# Supplementary material for: A redox active organodiselenide as an efficacious catalyst for the synthesis of oxygen-containing heterocyclic compounds
Source: Royal Society of Chemistry journal article supplement (doi:10.1039/d3nj01423a), 2023-01-01

# SUPPLEMENTARY INFORMATION

## A redox active organodiselenide as an efficacious catalyst for synthesis of oxygen containing heterocyclic compounds

Noimur Rahman <sup>\*a</sup>, Nisha Kushwah <sup>b</sup> and K. Indira Priyadarsini<sup>a</sup>

---

<sup>a</sup>*School of Chemical Sciences, UM-DAE, Centre for Excellence in Basic Sciences, Mumbai University (Kalina Campus), Santa Cruz (East), Mumbai-400098, India*

<sup>b</sup>*Chemistry Division, Bhabha Atomic Research Centre, Trombay, Mumbai-400085, India*

\*Corresponding author E-mail address: dr.noimur@gmail.com

\*Corresponding author. Tel.: +91 9863599033

---

| Table of Content                                                               | Page No. |
|--------------------------------------------------------------------------------|----------|
| 1. X Ray Crystallography Data for compound <b>4a</b>                           | 2        |
| 2. X Ray Crystallography Data for compound <b>4c</b>                           | 3        |
| 3. X Ray Crystallography Data for compound <b>4i</b>                           | 4        |
| 4. Spectral data of the synthesized compounds                                  | 5        |
| 5. <sup>1</sup> H and <sup>13</sup> C NMR Spectra of the synthesized compounds | 11       |

## 1. X Ray Crystallography Data for the compound 4a

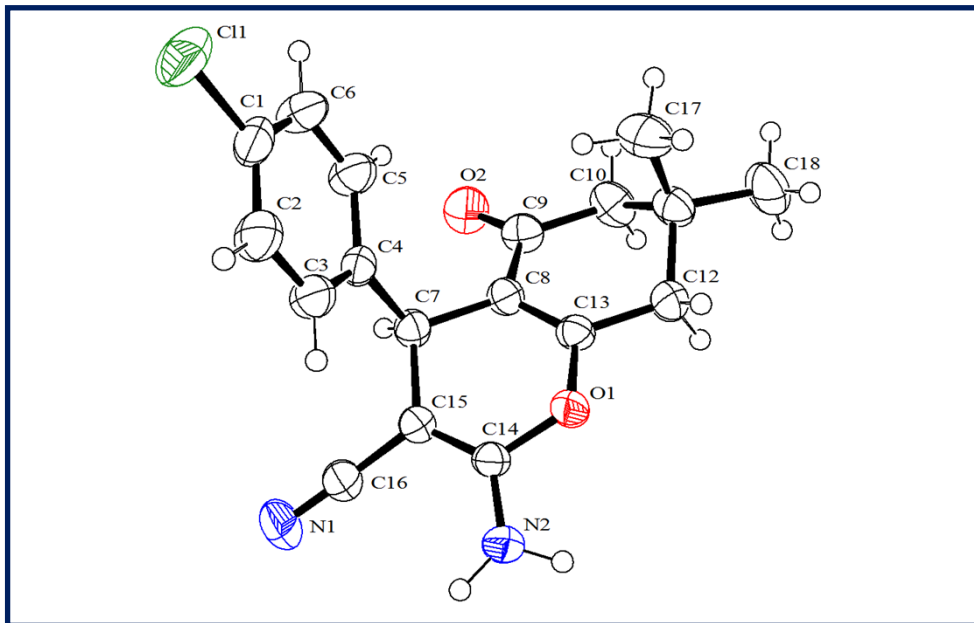

X-ray crystallography data for compound **4a** (CCDC NO. 2249462)

**Datablock: shelx**

---

Bond precision: C-C = 0.0045 Å Wavelength=1.54184

Cell: a=9.4113 (1) b=16.8257 (1) c=10.9139 (1)  
alpha=90 beta=112.124 (1) gamma=90

Temperature: 298 K

|                        | Calculated       | Reported         |
|------------------------|------------------|------------------|
| Volume                 | 1600.99 (3)      | 1600.99 (3)      |
| Space group            | P 21/n           | P 21/n           |
| Hall group             | -P 2yn           | -P 2yn           |
| Moiety formula         | C18 H17 Cl N2 O2 | ?                |
| Sum formula            | C18 H17 Cl N2 O2 | C18 H17 Cl N2 O2 |
| Mr                     | 328.79           | 328.79           |
| Dx, g cm <sup>-3</sup> | 1.364            | 1.364            |
| Z                      | 4                | 4                |
| Mu (mm <sup>-1</sup> ) | 2.204            | 2.204            |
| F000                   | 688.0            | 688.0            |
| F000'                  | 691.31           |                  |
| h, k, lmax             | 11, 21, 13       | 11, 21, 13       |
| Nref                   | 3398             | 3363             |
| Tmin, Tmax             | 0.876, 0.896     | 0.683, 1.000     |
| Tmin'                  | 0.802            |                  |

Correction method= # Reported T Limits: Tmin=0.683 Tmax=1.000  
AbsCorr = MULTI-SCAN

Data completeness= 0.990 Theta(max)= 77.336

R(reflections)= 0.0655 ( 2879) wR2(reflections)= 0.2959 ( 3363)

S = 1.085 Npar= 218

## 2. X Ray Crystallography Data for the compound **4c**

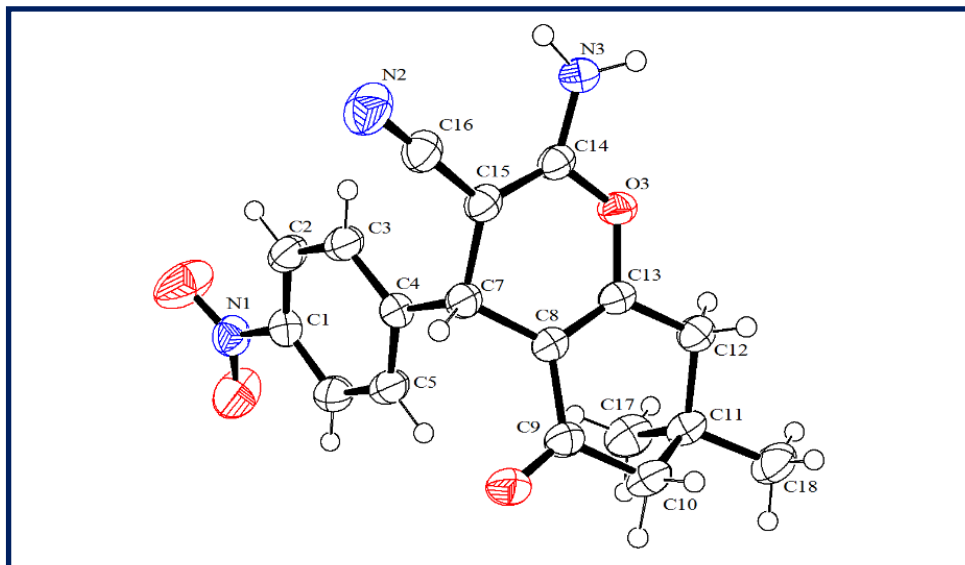

X-ray crystallography data for compound **4c** (CCDC NO. 2249461)

### Datablock: shelx

Bond precision: C-C = 0.0029 Å                      Wavelength=1.54184

Cell:                      a=15.8444 (1)                      b=6.5350 (1)                      c=16.2557 (1)  
                                  alpha=90                      beta=98.636 (1)                      gamma=90

Temperature:              298 K

|                        | Calculated    | Reported      |
|------------------------|---------------|---------------|
| Volume                 | 1664.08 (3)   | 1664.08 (3)   |
| Space group            | P 21/n        | P 21/n        |
| Hall group             | -P 2yn        | -P 2yn        |
| Moiety formula         | C19 H20 N2 O2 | ?             |
| Sum formula            | C19 H20 N2 O2 | C19 H20 N2 O2 |
| Mr                     | 308.37        | 308.37        |
| Dx, g cm <sup>-3</sup> | 1.231         | 1.231         |
| Z                      | 4             | 4             |
| Mu (mm <sup>-1</sup> ) | 0.643         | 0.643         |
| F000                   | 656.0         | 656.0         |
| F000'                  | 657.91        |               |
| h, k, lmax             | 20, 8, 20     | 19, 8, 20     |
| Nref                   | 3518          | 3468          |
| Tmin, Tmax             | 0.938, 0.968  | 0.520, 1.000  |
| Tmin'                  | 0.938         |               |

Correction method= # Reported T Limits: Tmin=0.520 Tmax=1.000  
 AbsCorr = MULTI-SCAN

Data completeness= 0.986                      Theta(max)= 77.073

R(reflections)= 0.0658 ( 3067)

wR2(reflections)=  
 0.2688 ( 3468)

S = 1.150

Npar= 220

### 3. X Ray Crystallography Data for the compound 4i

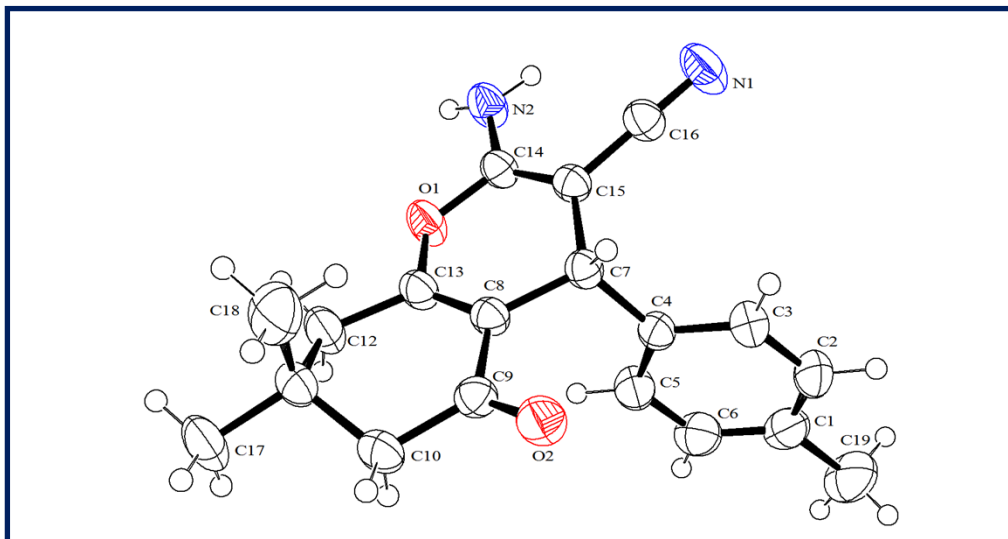

X-ray crystallography data for compound **4i** (CCDC NO. 2249463)

#### Datablock: shelx

Bond precision: C-C = 0.0020 Å                      Wavelength=1.54184  
 Cell:                      a=9.5870 (1)                      b=16.5558 (1)                      c=10.7117 (1)  
                                          alpha=90                      beta=111.072 (1)                      gamma=90  
 Temperature:                      298 K

|                        | Calculated    | Reported      |
|------------------------|---------------|---------------|
| Volume                 | 1586.48 (3)   | 1586.47 (3)   |
| Space group            | P 21/n        | P 21/n        |
| Hall group             | -P 2yn        | -P 2yn        |
| Moiety formula         | C18 H17 N3 O4 | ?             |
| Sum formula            | C18 H17 N3 O4 | C18 H17 N3 O4 |
| Mr                     | 339.35        | 339.34        |
| Dx, g cm <sup>-3</sup> | 1.421         | 1.421         |
| Z                      | 4             | 4             |
| Mu (mm <sup>-1</sup> ) | 0.848         | 0.848         |
| F000                   | 712.0         | 712.0         |
| F000'                  | 714.33        |               |
| h, k, lmax             | 12, 20, 13    | 12, 20, 13    |
| Nref                   | 3347          | 3288          |
| Tmin, Tmax             | 0.919, 0.958  | 0.712, 1.000  |
| Tmin'                  | 0.919         |               |

Correction method= # Reported T Limits: Tmin=0.712 Tmax=1.000  
 AbsCorr = MULTI-SCAN

Data completeness= 0.982                      Theta(max)= 76.864

R(reflections)= 0.0395 ( 2904)

wR2(reflections)=  
0.1347 ( 3288)

S = 1.147

Npar= 237

## SPECTRAL DATA OF THE SYNTHESIZED COMPOUNDS

### 2-amino-4-(4-chlorophenyl)-5,6,7,8-tetrahydro-7,7-dimethyl-5-oxo-4H-chromene-3-carbonitrile, 4a

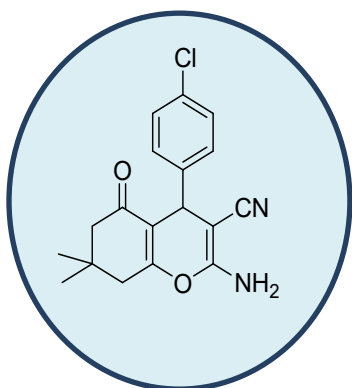

Off white solid, m.p. 213-215 °C,  
 IR (KBr):  $\nu$  3381, 3185, 2953, 2187, 1672, 1633, 1495, 1240  $\text{cm}^{-1}$ .  
 $^1\text{H}$  NMR (400 MHz, DMSO- $d_6$ ):  $\delta$  7.32 (d,  $J = 7.9$  Hz, 2H), 7.15 (d,  $J = 8.0$  Hz, 2H), 7.01 (s, 2H), 4.17 (s, 1H), 2.49 (s, 2H), 2.23 (d,  $J = 16.1$  Hz, 1H), 2.07 (d,  $J = 16.0$  Hz, 1H), 1.01 (s, 3H), 0.92 (s, 3H) ppm.  $^{13}\text{C}$  NMR (100 MHz, DMSO- $d_6$ ):  $\delta$  196.40, 163.22, 158.93, 144.13, 131.61, 129.54, 128.75, 120.02, 112.73, 58.29, 50.37, 35.53, 32.22, 28.72, 27.26 ppm.

### 2-amino-4-(4-bromophenyl)-5,6,7,8-tetrahydro-7,7-dimethyl-5-oxo-4H-chromene-3-carbonitrile, 4b

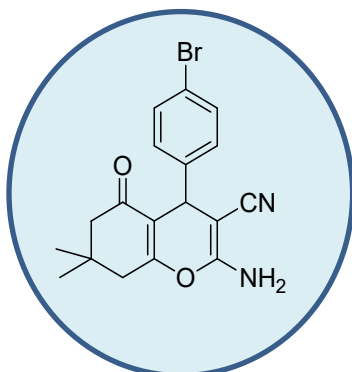

White solid, m.p. 203-205 °C,  
 IR (KBr):  $\nu$  3379, 3283, 3192, 2965, 2194, 1676, 1607, 1489, 1258  $\text{cm}^{-1}$ .  $^1\text{H}$  NMR (400 MHz, DMSO- $d_6$ ):  $\delta$  7.33 (d,  $J = 7.5$  Hz, 2H), 7.16 (d,  $J = 7.5$  Hz, 2H), 7.03 (s, 2H), 4.18 (s, 1H), 2.49 (s, 2H), 2.23 (d,  $J = 16.0$  Hz, 1H), 2.08 (d,  $J = 16.0$  Hz, 1H), 1.01 (s, 3H), 0.93 (s, 3H) ppm.  $^{13}\text{C}$  NMR (100 MHz, DMSO- $d_6$ ):  $\delta$  196.24, 163.13, 158.94, 144.16, 131.59, 129.56, 128.75, 120.01, 112.76, 58.26, 50.38, 35.55, 32.23, 28.74, 27.29 ppm.

### 2-amino-4-(4-nitrophenyl)-5,6,7,8-tetrahydro-7,7-dimethyl-5-oxo-4H-chromene-3-carbonitrile, 4c

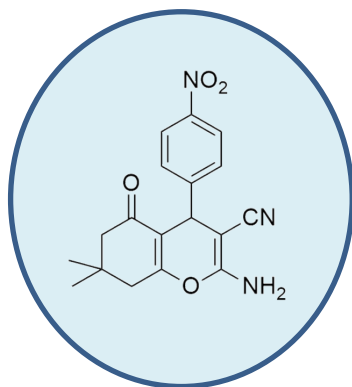

White solid, m.p. 178-179 °C,  
 IR (KBr):  $\nu$  3391, 3317, 3215, 2964, 2191, 1673, 1607, 1484, 1257  $\text{cm}^{-1}$ .  $^1\text{H}$  NMR (400 MHz, DMSO- $d_6$ ):  $\delta$  8.15 (d,  $J = 6.9$  Hz, 2H), 7.43 (d,  $J = 6.9$  Hz, 2H), 7.15 (s, 2H), 4.35 (s, 1H), 2.52 (s, 2H), 2.25 (d,  $J = 15.8$  Hz, 1H), 2.09 (d,  $J = 15.9$  Hz, 1H), 1.02 (s, 3H), 0.94 (s, 3H) ppm.  $^{13}\text{C}$  NMR (100 MHz, DMSO- $d_6$ ):  $\delta$  196.27, 163.63, 159.03, 152.72, 146.71, 129.06, 124.12, 119.78, 112.16, 57.48, 50.31, 36.10, 32.25, 28.68, 27.37 ppm.

**2-amino-4-(3-methoxyphenyl)-5,6,7,8-tetrahydro-7,7-dimethyl-5-oxo-4H-chromene-3-carbonitrile, 4d**

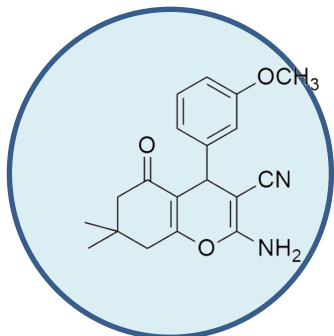

White solid, m.p. 210-211 °C,  
 IR (KBr):  $\nu$  3381, 3192, 2188, 1689, 1604, 1098  $\text{cm}^{-1}$ .  $^1\text{H}$  NMR (400 MHz, DMSO- $d_6$ ):  $\delta$  7.19 (t,  $J$  = 7.6 Hz, 1H), 6.97 (s, 2H), 6.72 (dd,  $J$  = 14.9, 7.9 Hz, 2H), 6.64 (s, 1H), 4.13 (s, 1H), 3.69 (s, 3H), 2.50 (s, 2H), 2.25 (d,  $J$  = 16.1 Hz, 1H), 2.10 (d,  $J$  = 16.1 Hz, 1H), 1.02 (s, 3H), 0.95 (s, 3H).  $^{13}\text{C}$  NMR (100 MHz, DMSO- $d_6$ ):  $\delta$  196.22, 163.10, 159.66, 146.74, 129.92, 120.14, 119.78, 113.68, 113.03, 111.91, 55.36, 50.41, 35.89, 32.22, 28.87, 27.17 ppm.

**2-amino-4-(4-cyanophenyl)-5,6,7,8-tetrahydro-7,7-dimethyl-5-oxo-4H-chromene-3-carbonitrile, 4e**

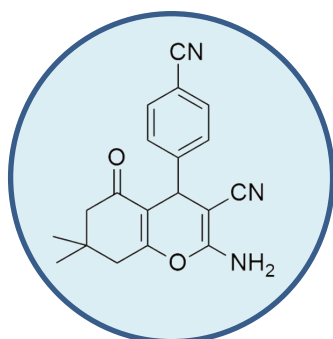

Off white solid, m.p. 224-225 °C °C,  
 IR (KBr):  $\nu$  3398, 3324, 3213, 2964, 2227, 1686, 1658, 1605, 1215, 859  $\text{cm}^{-1}$ .  $^1\text{H}$  NMR (400 MHz, DMSO- $d_6$ ):  $\delta$  7.75 (d,  $J$  = 7.5 Hz, 2H), 7.34 (d,  $J$  = 7.6 Hz, 2H), 7.11 (s, 1H), 4.27 (s, 1H), 2.50 – 2.44 (m, 2H), 2.24 (d,  $J$  = 16.0 Hz, 1H), 2.09 (d,  $J$  = 16.0 Hz, 1H), 1.02 (s, 3H), 0.93 (s, 3H) ppm.  $^{13}\text{C}$  NMR (100 MHz, DMSO- $d_6$ ):  $\delta$  196.27, 163.59, 158.99, 150.66, 132.86, 128.79, 119.80, 119.22, 112.18, 109.88, 57.59, 50.31, 36.24, 32.26, 28.66, 27.38 ppm.

**2-amino-7,7-dimethyl-4-(2-nitrostyryl)-5-oxo-5,6,7,8-tetrahydro-4H-chromene-3-carbonitrile, 4f**

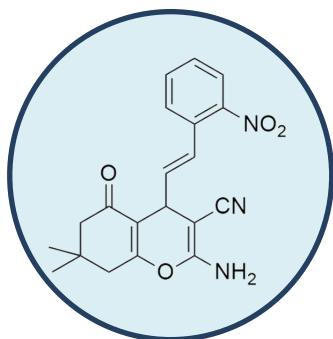

White solid, m.p. 185-187 °C,  
 IR (KBr):  $\nu$  3388, 3293, 3025, 2956, 2187, 1681, 1658, 1604, 1377, 1243  $\text{cm}^{-1}$ .  $^1\text{H}$  NMR (400 MHz, DMSO- $d_6$ ): 7.89 (d,  $J$  = 7.8 Hz, 2H), 7.58 (ddd,  $J$  = 47.8, 14.1, 7.0 Hz, 1H), 7.10 (s, 2H), 6.65 (d,  $J$  = 15.6 Hz, 1H), 6.24 (dd,  $J$  = 15.5, 6.6 Hz, 1H), 3.86 (d,  $J$  = 6.2 Hz, 2H), 2.49-2.16 (m, 4H), 1.02 (s, 3H), 0.99 (s, 3H) ppm.  $^{13}\text{C}$  NMR (100 MHz, DMSO- $d_6$ ):  $\delta$  196.40, 163.28, 159.91, 148.14, 137.11, 133.72, 131.29, 128.99, 128.42, 124.63, 124.03, 120.11, 111.96, 54.88, 50.46, 33.17, 32.22, 28.79, 27.21 ppm.

**2-amino-4-(2-fluorophenyl)-5,6,7,8-tetrahydro-7,7-dimethyl-5-oxo-4H-chromene-3-carbonitrile, 4g**

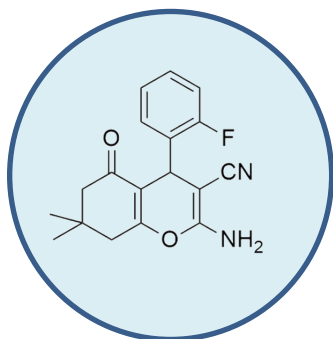

White solid, m.p. 213-215 °C,

IR (KBr):  $\nu$  3471, 3324, 3015, 2961, 2870, 2198, 1653, 1607, 1470, 1368, 1249  $\text{cm}^{-1}$ .  $^1\text{H}$  NMR (400 MHz,  $\text{DMSO-d}_6$ ):  $\delta$  7.29 – 7.06 (m, 4H), 6.98 (s, 2H), 4.44 (s, 1H), 2.49 (q,  $J = 17.7$  Hz, 1H), 2.24 (d,  $J = 16.1$  Hz, 1H), 2.06 (d,  $J = 16.1$  Hz, 1H), 1.02 (s, 3H), 0.93 (s, 3H) ppm.  $^{13}\text{C}$  NMR (100 MHz,  $\text{DMSO-d}_6$ ):  $\delta$  196.30, 163.71, 159.23, 158.77, 131.62, 131.46, 130.08, 129.14, 129.05, 124.90, 111.80, 56.56, 50.32, 32.20, 30.28, 28.90, 26.97 ppm.

**2-amino-4-(3-fluorophenyl)-5,6,7,8-tetrahydro-7,7-dimethyl-5-oxo-4H-chromene-3-carbonitrile, 4h**

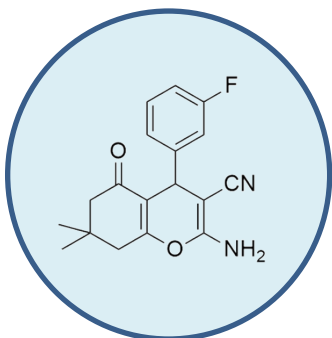

White solid, m.p. 211-212 °C,

IR (KBr):  $\nu$  3473, 3327, 3009, 2970, 2868, 2195, 1652, 1609, 1473, 1366, 1247  $\text{cm}^{-1}$ .  $^1\text{H}$  NMR (400 MHz,  $\text{DMSO-d}_6$ ):  $\delta$  7.32 (d,  $J = 5.7$  Hz, 1H), 6.97 (dd,  $J = 27.8, 10.9$  Hz, 4H), 4.22 (s, 1H), 2.51 (s, 2H), 2.24 (d,  $J = 15.8$  Hz, 1H), 2.11 (d,  $J = 15.9$  Hz, 1H), 1.02 (s, 3H), 0.94 (s, 3H) ppm.  $^{13}\text{C}$  NMR (100 MHz,  $\text{DMSO-d}_6$ ):  $\delta$  196.26, 163.32, 158.99, 148.10, 130.79, 130.70, 123.68, 119.98, 114.01, 113.73, 112.63, 58.21, 50.39, 35.77, 32.23, 28.69, 27.32 ppm.

**2-amino-7,7-dimethyl-5-oxo-4-(*p*-tolyl)-5,6,7,8-tetrahydro-4H-chromene-3-carbonitrile, 4i**

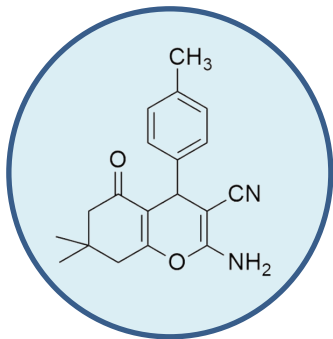

Off white solid, m.p. 215-217 °C,

IR (KBr):  $\nu$  3424, 3328, 3025, 2953, 2197, 1675, 1637, 1511, 1249  $\text{cm}^{-1}$ .  $^1\text{H}$  NMR (400 MHz,  $\text{DMSO-d}_6$ ):  $\delta$  7.08 – 6.98 (m, 4H), 6.91 (s, 2H), 4.10 (s, 1H), 2.23 (d,  $J = 9.4$  Hz, 4H), 2.06 (d,  $J = 16.1$  Hz, 1H), 1.01 (s, 3H), 0.92 (s, 3H) ppm.  $^{13}\text{C}$  NMR (100 MHz,  $\text{DMSO-d}_6$ ):  $\delta$  196.36, 162.90, 158.89, 142.19, 136.18, 129.36, 127.49, 120.23, 113.28, 58.99, 50.42, 35.59, 32.21, 28.84, 27.16, 21.00 ppm.

**2-amino-7,7-dimethyl-5-oxo-4-phenyl-5,6,7,8-tetrahydro-4H-chromene-3-carbonitrile, 4j**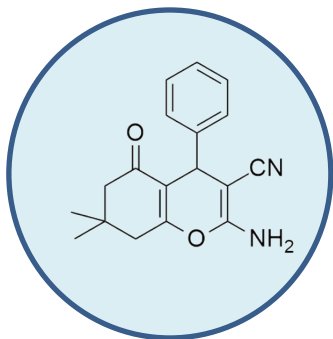

Off white solid, m.p. 225-227 °C,  
 IR (KBr):  $\nu$  3398, 3326, 3211, 3026, 2963, 2201, 1686, 1602, 1247  $\text{cm}^{-1}$ .  $^1\text{H}$  NMR (400 MHz,  $\text{DMSO-d}_6$ ):  $\delta$  7.27-7.14 (m, 5H), 6.08 (s, 2H), 4.16 (s, 1H), 2.51 (s, 2H), 2.23 (d, 1H,  $J = 16$  Hz), 2.12 (d, 1H,  $J = 16$  Hz), 1.03 (s, 3H), 0.95 (s, 3H) ppm.  $^{13}\text{C}$  NMR (100 MHz,  $\text{DMSO-d}_6$ ):  $\delta$  196.33, 163.07, 158.94, 145.14, 128.82, 127.57, 127.08, 120.19, 113.16, 58.83, 50.42, 36.00, 32.24, 28.83, 27.22 ppm.

**2-amino-5-oxo-4-(*p*-tolyl)-5,6,7,8-tetrahydro-4H-chromene-3-carbonitrile, 5a**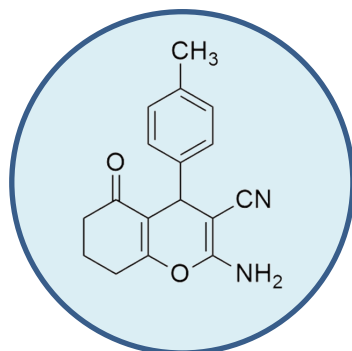

White solid, m.p. 211-213 °C,  
 IR (KBr):  $\nu$  3411, 3334, 3217, 2195, 1680, 1661, 1604, 1363  $\text{cm}^{-1}$ .  $^1\text{H}$  NMR (400 MHz,  $\text{DMSO-d}_6$ ):  $\delta$  7.02 (d, 2H,  $J = 8$  Hz), 6.99 (d, 2H,  $J = 8$  Hz), 6.86 (s, 2H), 4.10 (s, 1H), 2.57-2.27 (m, 4H), 2.21 (s, 3H), 1.92-1.85 (m, 2H) ppm.  $^{13}\text{C}$  NMR (100 MHz,  $\text{DMSO-d}_6$ ):  $\delta$  196.44, 164.78, 158.87, 142.23, 136.10, 129.33, 127.46, 120.21, 114.38, 58.91, 36.78, 35.45, 26.88, 20.99, 20.24 ppm.

**2-amino-4-(2-fluorophenyl)-5-oxo-5,6,7,8-tetrahydro-4H-chromene-3-carbonitrile, 5b**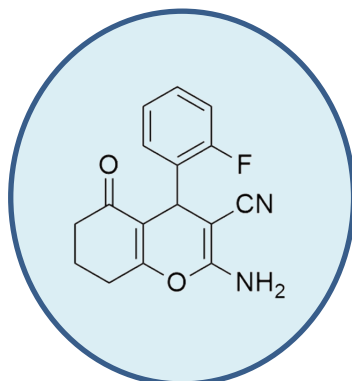

White solid, m.p. 214-216 °C,  
 IR (KBr):  $\nu$  3329, 3255, 3183, 2957, 2191, 1653, 1607, 1472, 1369  $\text{cm}^{-1}$ .  $^1\text{H}$  NMR (400 MHz,  $\text{DMSO-d}_6$ ):  $\delta$  7.21 – 7.02 (m, 4H), 6.94 (s, 2H), 4.43 (s, 1H), 2.58 (t,  $J = 5.4$  Hz, 2H), 2.24 (dt,  $J = 12.0, 5.9$  Hz, 2H), 1.91 (dd,  $J = 12.3, 6.4$  Hz, 2H) ppm.  $^{13}\text{C}$  NMR (100 MHz,  $\text{DMSO-d}_6$ ):  $\delta$  196.38, 165.60, 160.47, 159.13, 129.90, 128.93, 124.97, 119.92, 115.91, 112.88, 57.32, 36.69, 29.90, 26.89, 20.27 ppm.



**2-amino-4-(2-methoxyphenyl)-5-oxo-5,6,7,8-tetrahydro-4H-chromene-3-carbonitrile, 5c**

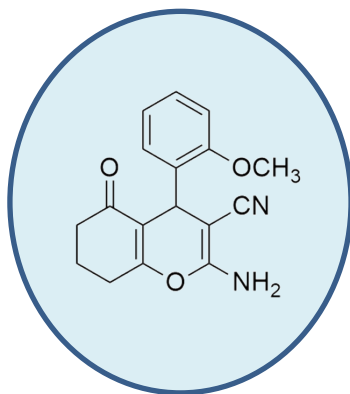

White solid, m.p. 208-210 °C,  
 IR (KBr):  $\nu$  3382, 3325, 3190, 2962, 2187, 1685, 1606, 1099  $\text{cm}^{-1}$ .  
 $^1\text{H}$  NMR (400 MHz,  $\text{DMSO-d}_6$ ):  $\delta$  7.12 (t,  $J = 7.4$  Hz, 1H), 6.93 (t,  $J = 6.6$  Hz, 2H), 6.81 (t,  $J = 7.2$  Hz, 1H), 6.72 (s, 2H), 4.50 (s, 1H), 3.73 (s, 3H), 2.53 (d,  $J = 29.9$  Hz, 2H), 2.33 – 2.09 (m, 2H), 2.04 – 1.69 (m, 2H) ppm.  $^{13}\text{C}$  NMR (100 MHz,  $\text{DMSO-d}_6$ ):  $\delta$  196.37, 165.57, 159.36, 157.25, 132.92, 128.52, 128.20, 120.96, 120.24, 113.53, 112.11, 58.16, 56.15, 36.85, 30.08, 26.93, 20.37 ppm.

**2-amino-4-(3-methoxyphenyl)-5-oxo-5,6,7,8-tetrahydro-4H-chromene-3-carbonitrile, 5d**

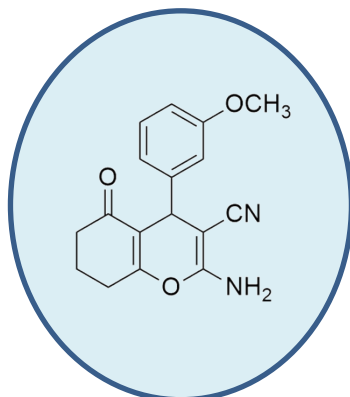

White solid, m.p. 210-212 °C,  
 IR (KBr):  $\nu$  3392, 3315, 3214, 2959, 2197, 1677, 1604, 1487, 1259  $\text{cm}^{-1}$ .  $^1\text{H}$  NMR (400 MHz,  $\text{DMSO-d}_6$ ):  $\delta$  7.17 (t,  $J = 7.7$  Hz, 1H), 6.91 (s, 2H), 6.80 – 6.58 (m, 3H), 4.12 (s, 1H), 3.68 (s, 3H), 2.59 – 2.57 (m, 4H), 1.93-1.87 (m, 2H) ppm.  $^{13}\text{C}$  NMR (100 MHz,  $\text{DMSO-d}_6$ ):  $\delta$  196.47, 165.06, 159.65, 158.95, 146.73, 129.93, 119.71, 114.10, 113.74, 111.85, 58.63, 55.37, 36.77, 35.73, 26.88, 20.24 ppm.

**2-amino-4-(3,4-dimethoxyphenyl)-5-oxo-5,6,7,8-tetrahydro-4H-chromene-3-carbonitrile, 5e**

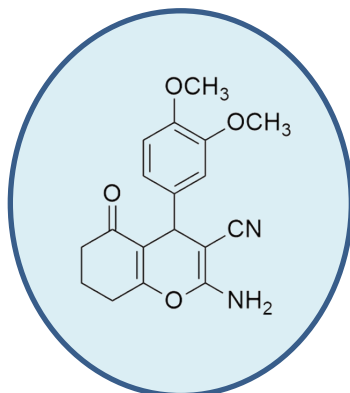

White solid, m.p. 214-217 °C,  
 IR (KBr):  $\nu$  3388, 3316, 3215, 2960, 2198, 1677, 1603, 1489, 1254  $\text{cm}^{-1}$ .  $^1\text{H}$  NMR (400 MHz,  $\text{DMSO-d}_6$ ):  $\delta$  6.96 – 6.75 (m, 3H), 6.68 (s, 1H), 6.61 (d,  $J = 7.9$  Hz, 1H), 3.68 (s, 6H), 2.57 (s, 2H), 2.24 (s, 2H), 1.99 – 1.78 (m, 2H) ppm.  $^{13}\text{C}$  NMR (100 MHz,  $\text{DMSO-d}_6$ ):  $\delta$  196.55, 164.77, 158.85, 148.89, 148.01, 137.78, 120.29, 119.43, 114.34, 112.39, 111.65, 58.91, 55.96, 36.83, 35.28, 26.90, 20.28 ppm.

**2-amino-4-(4-chlorophenyl)-5-oxo-5,6,7,8-tetrahydro-4H-chromene-3-carbonitrile, 5f**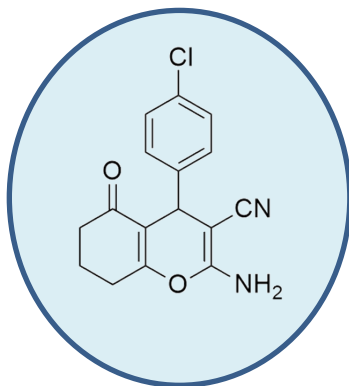

White solid, m.p. 221-223 °C,  
 IR (KBr):  $\nu$  3416, 3338, 3215, 2190, 1682, 1649, 1600, 1519,  
 1367  $\text{cm}^{-1}$ .  $^1\text{H}$  NMR (400 MHz,  $\text{DMSO-d}_6$ ):  $\delta$  7.30 (d,  $J = 7.7$  Hz,  
 2H), 7.14 (d,  $J = 7.8$  Hz, 2H), 6.96 (s, 2H), 4.16 (s, 1H), 2.57 (s,  
 2H), 2.30 – 2.15 (m, 2H), 1.90 (dd,  $J = 11.2, 5.7$  Hz, 2H) ppm.  $^{13}\text{C}$   
 NMR (100 MHz,  $\text{DMSO-d}_6$ ):  $\delta$  196.50, 165.18, 158.90, 144.18,  
 131.57, 129.51, 128.73, 113.79, 58.27, 36.73, 35.43, 26.90, 20.18  
 ppm.

**2-amino-4-(2-ethylphenyl)-5-oxo-5,6,7,8-tetrahydro-4H-chromene-3-carbonitrile, 5g**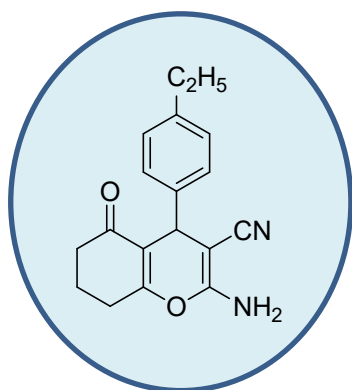

White solid, m.p. 213-215 °C,  
 IR (KBr):  $\nu$  3328, 3254, 3182, 2955, 2190, 1650, 1606, 1470,  
 1368  $\text{cm}^{-1}$ .  $^1\text{H}$  NMR (400 MHz,  $\text{DMSO-d}_6$ ):  $\delta$  7.08 (d,  $J = 8$  Hz,  
 2H), 7.01 (d,  $J = 8$  Hz, 2H), 6.87 (s, 2H), 4.11 (s, 1H), 2.57-2.47  
 (m, 2H), 2.27-2.21 (m, 2H), 1.93-1.84 (m, 2H), 1.93-1.44 (m, 3H),  
 1.12 (t,  $J = 7.5$  Hz, 2H) ppm.  $^{13}\text{C}$  NMR (100 MHz,  $\text{DMSO-d}_6$ ):  $\delta$   
 196.48, 164.86, 158.89, 142.44, 128.17, 127.46, 120.25, 114.37,  
 58.91, 36.78, 35.45, 28.16, 26.88, 20.23, 15.93 ppm.

# $^1\text{H}$ & $^{13}\text{C}$ NMR SPECTRA OF THE SYNTHESIZED COMPOUNDS

## $^1\text{H}$ NMR Spectrum of 4a

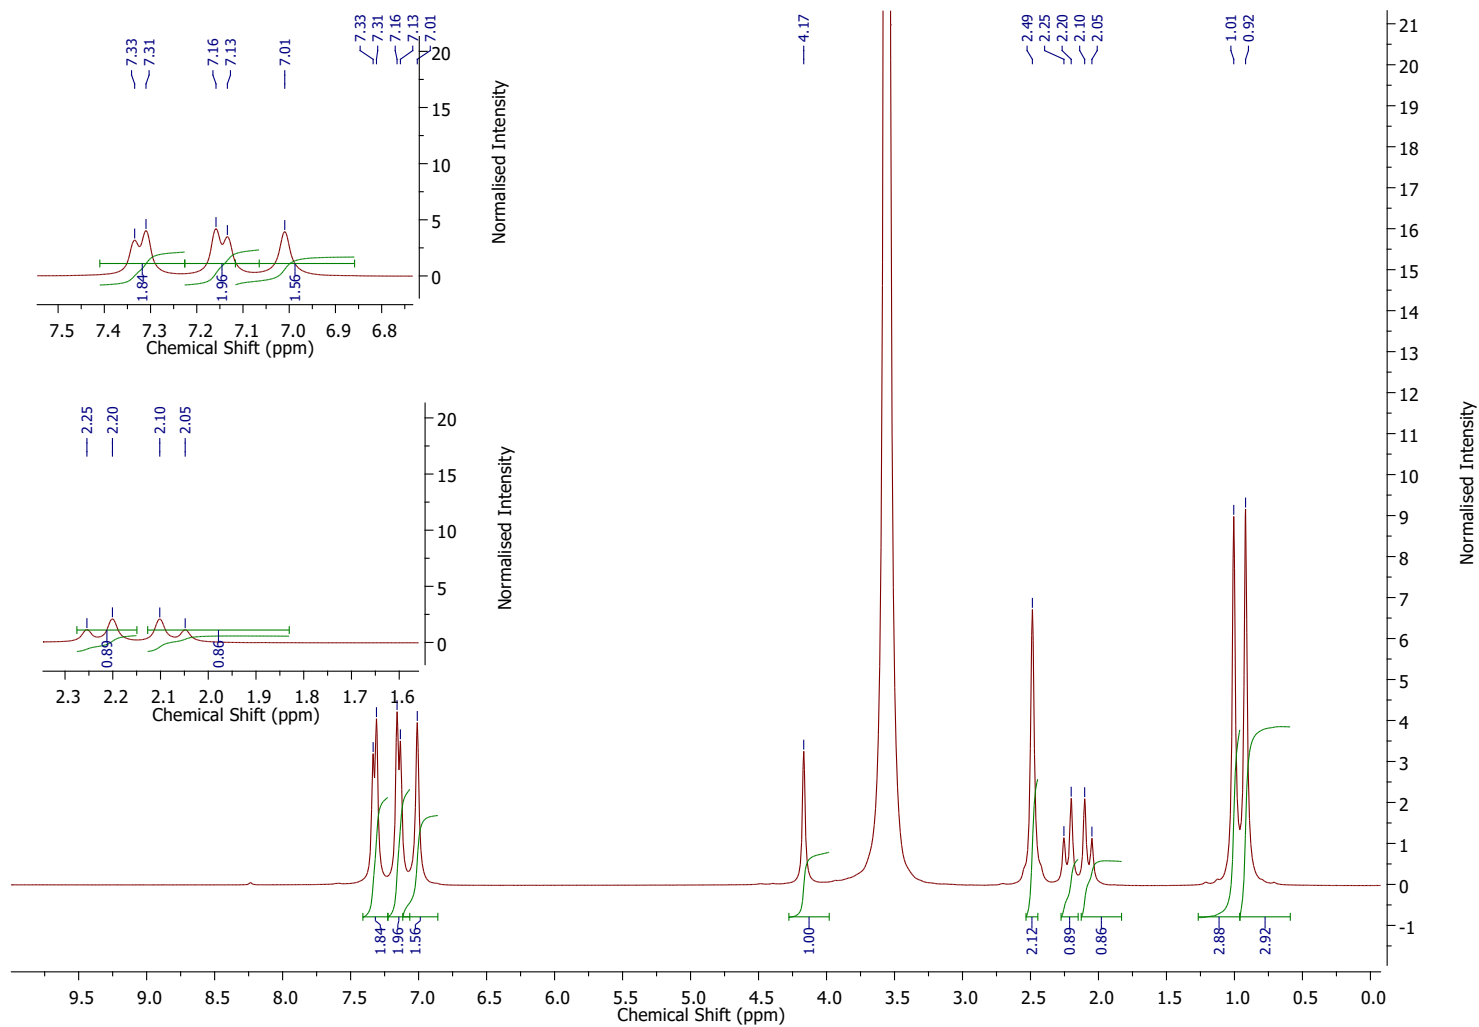

**$^{13}\text{C}$  NMR Spectrum of 4a**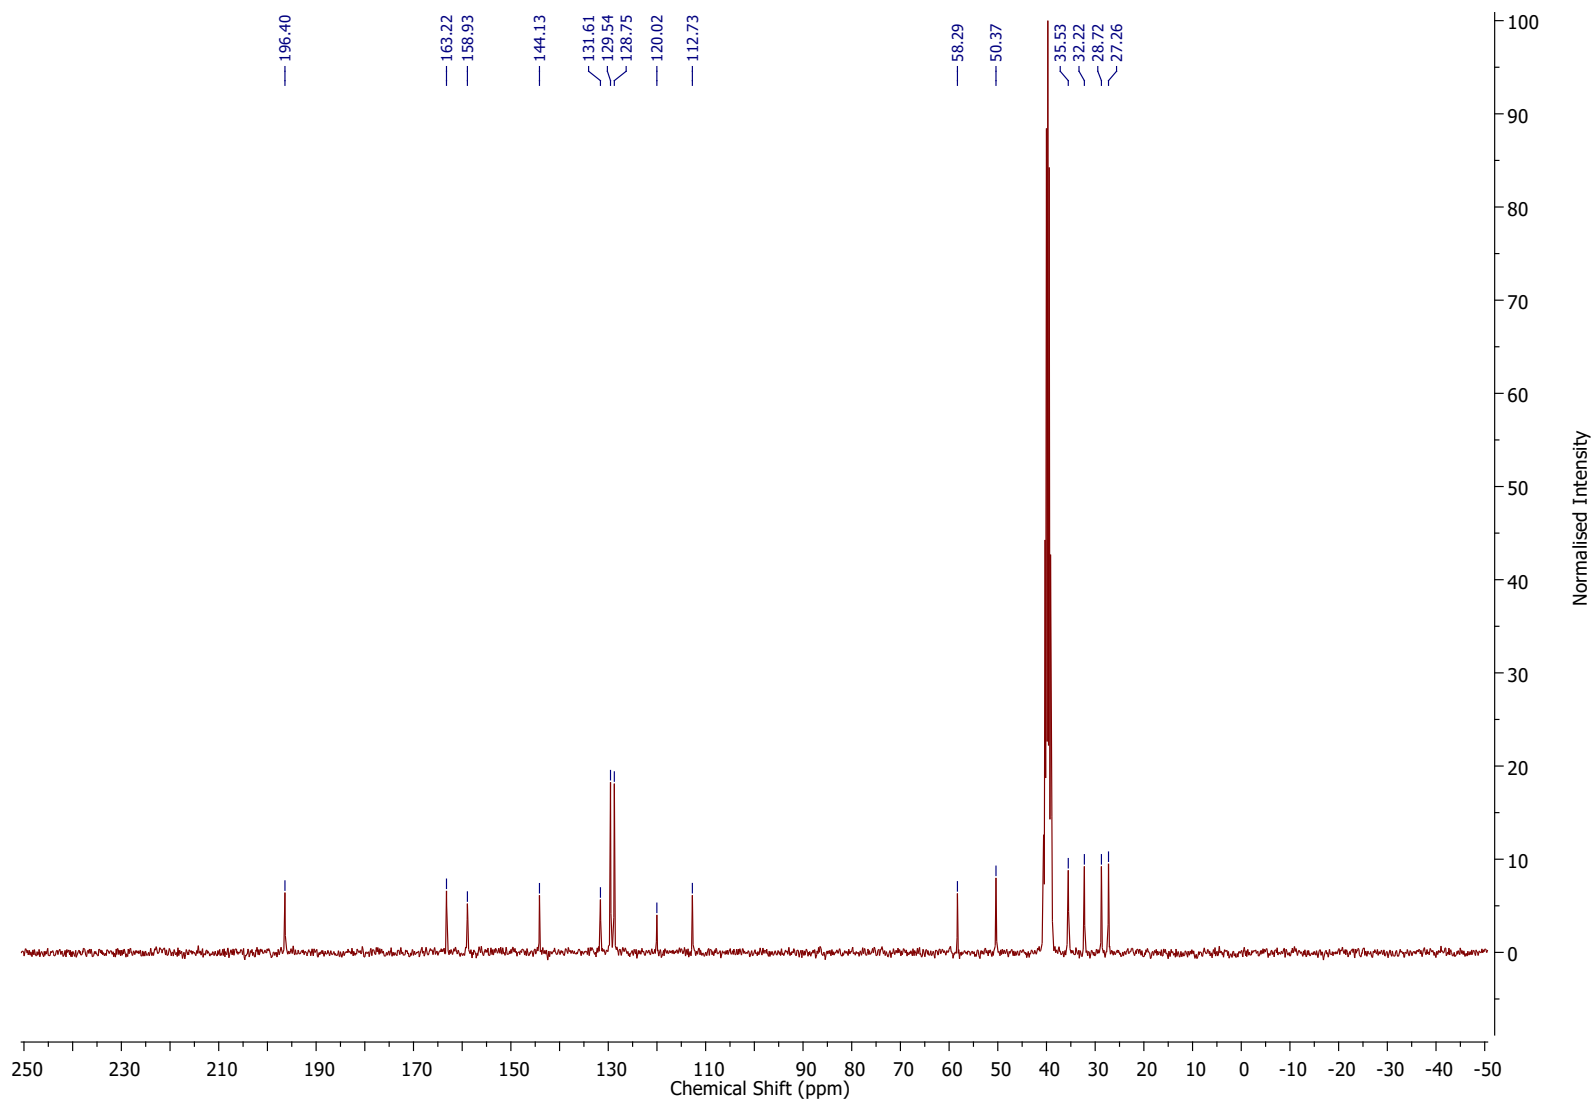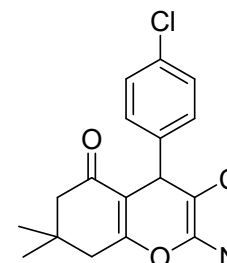

# $^1\text{H}$ NMR Spectrum of 4b

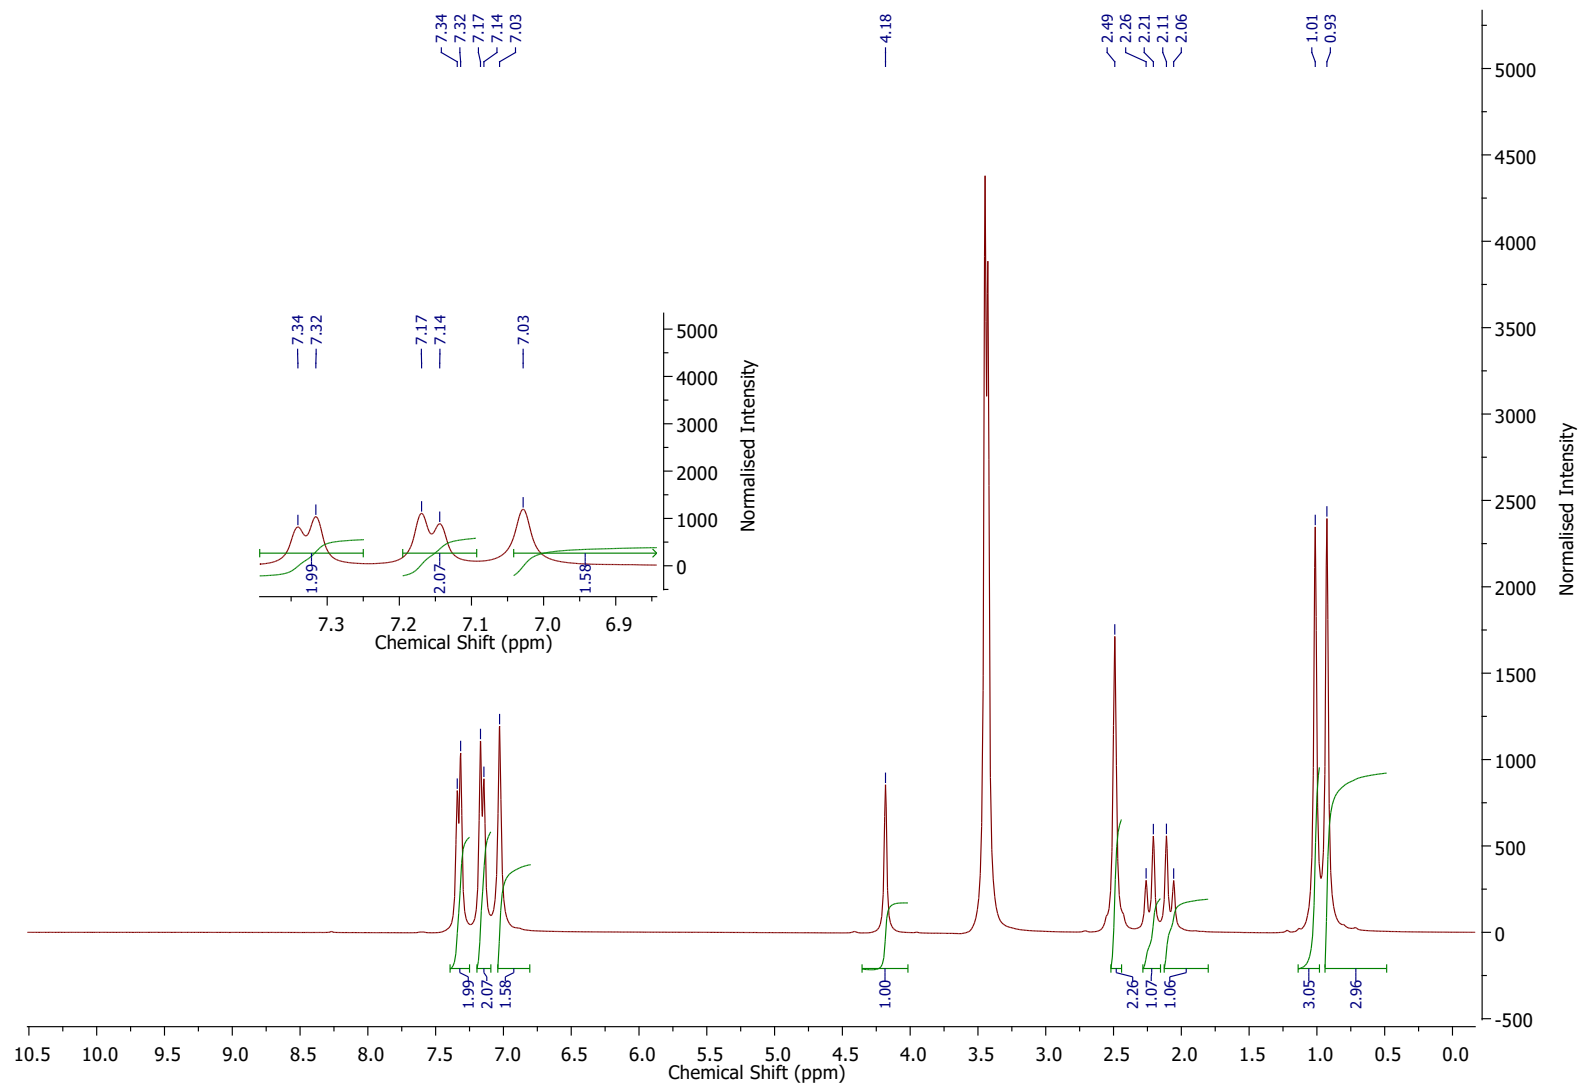

### $^{13}\text{C}$ NMR Spectrum of 4b

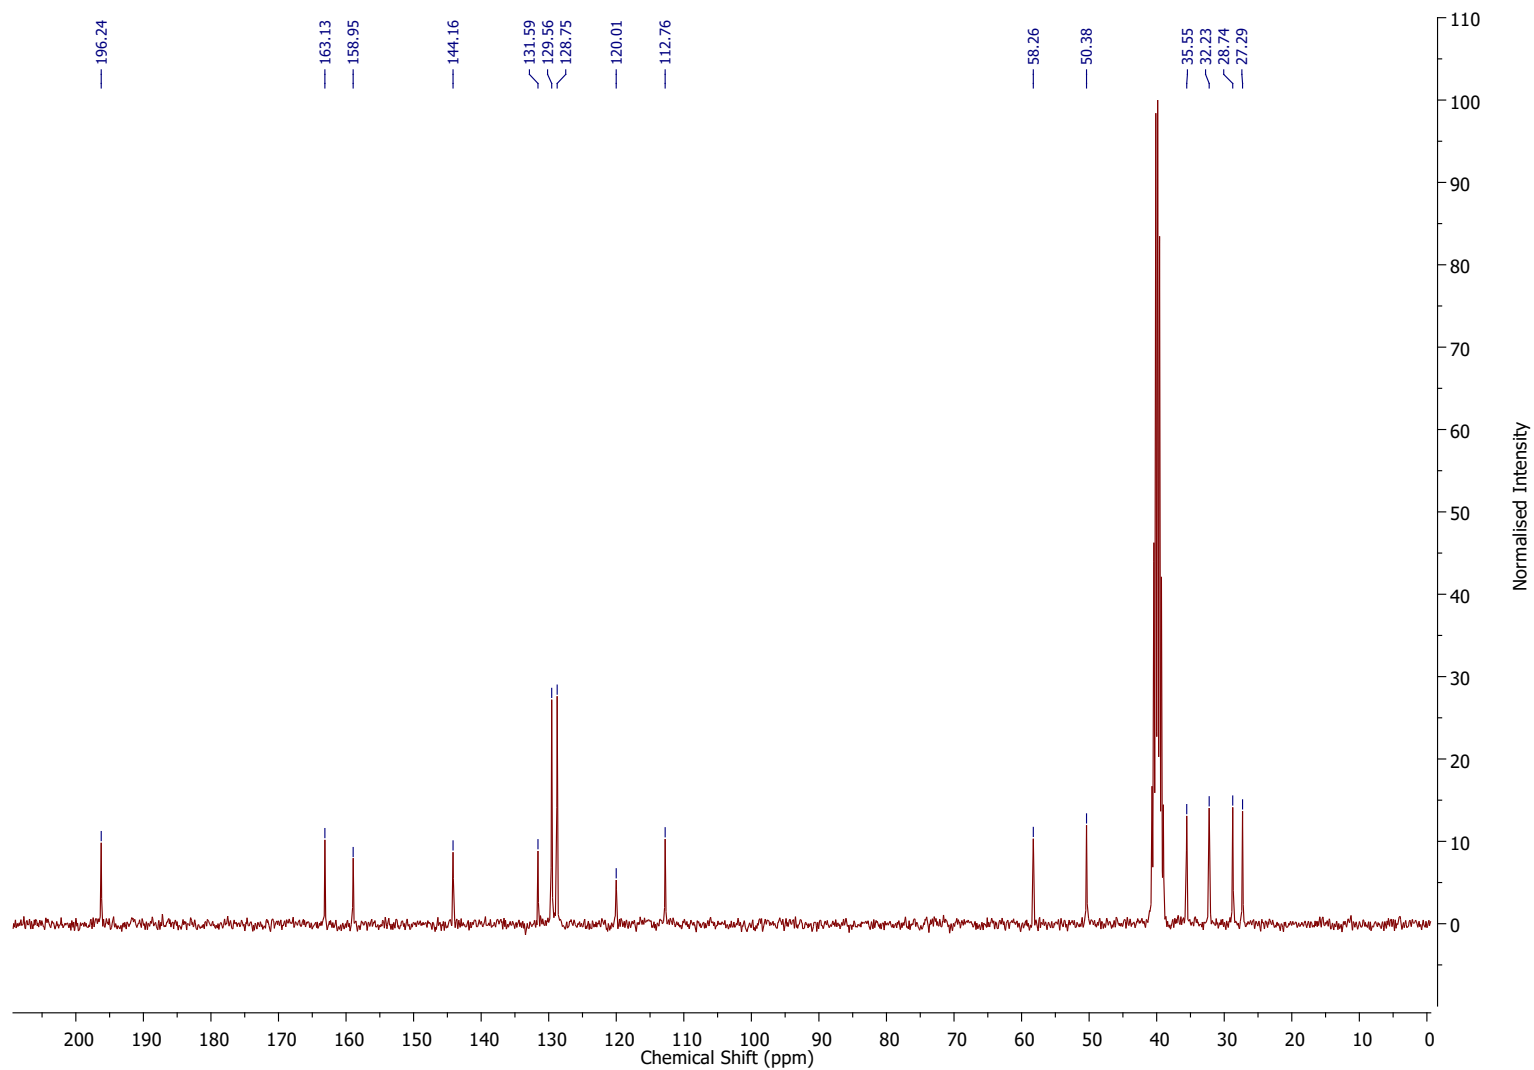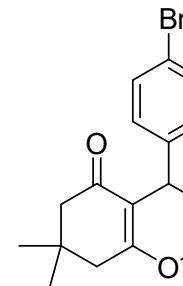

### $^1\text{H}$ NMR Spectrum of 4c

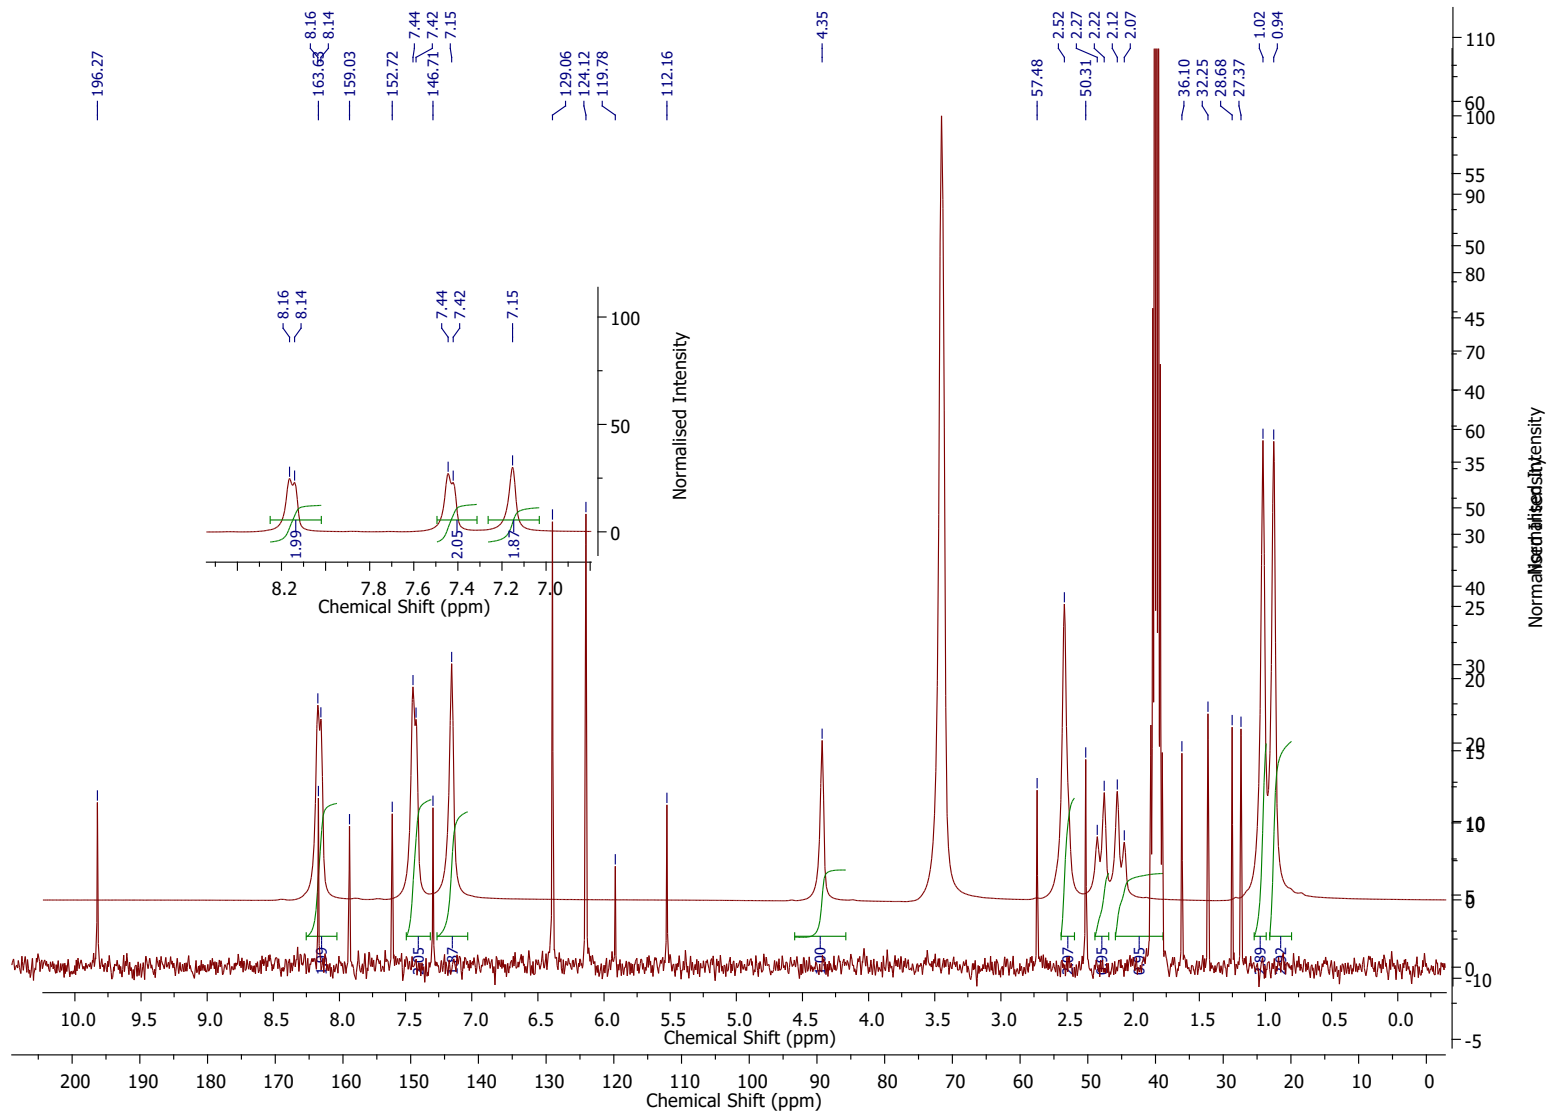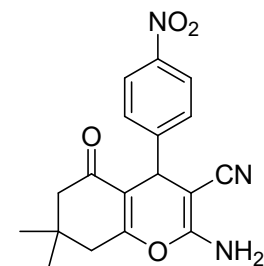

<sup>13</sup>C NMR Spectrum of 4c

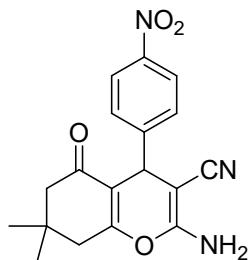

**<sup>1</sup>H NMR Spectrum of 4d**



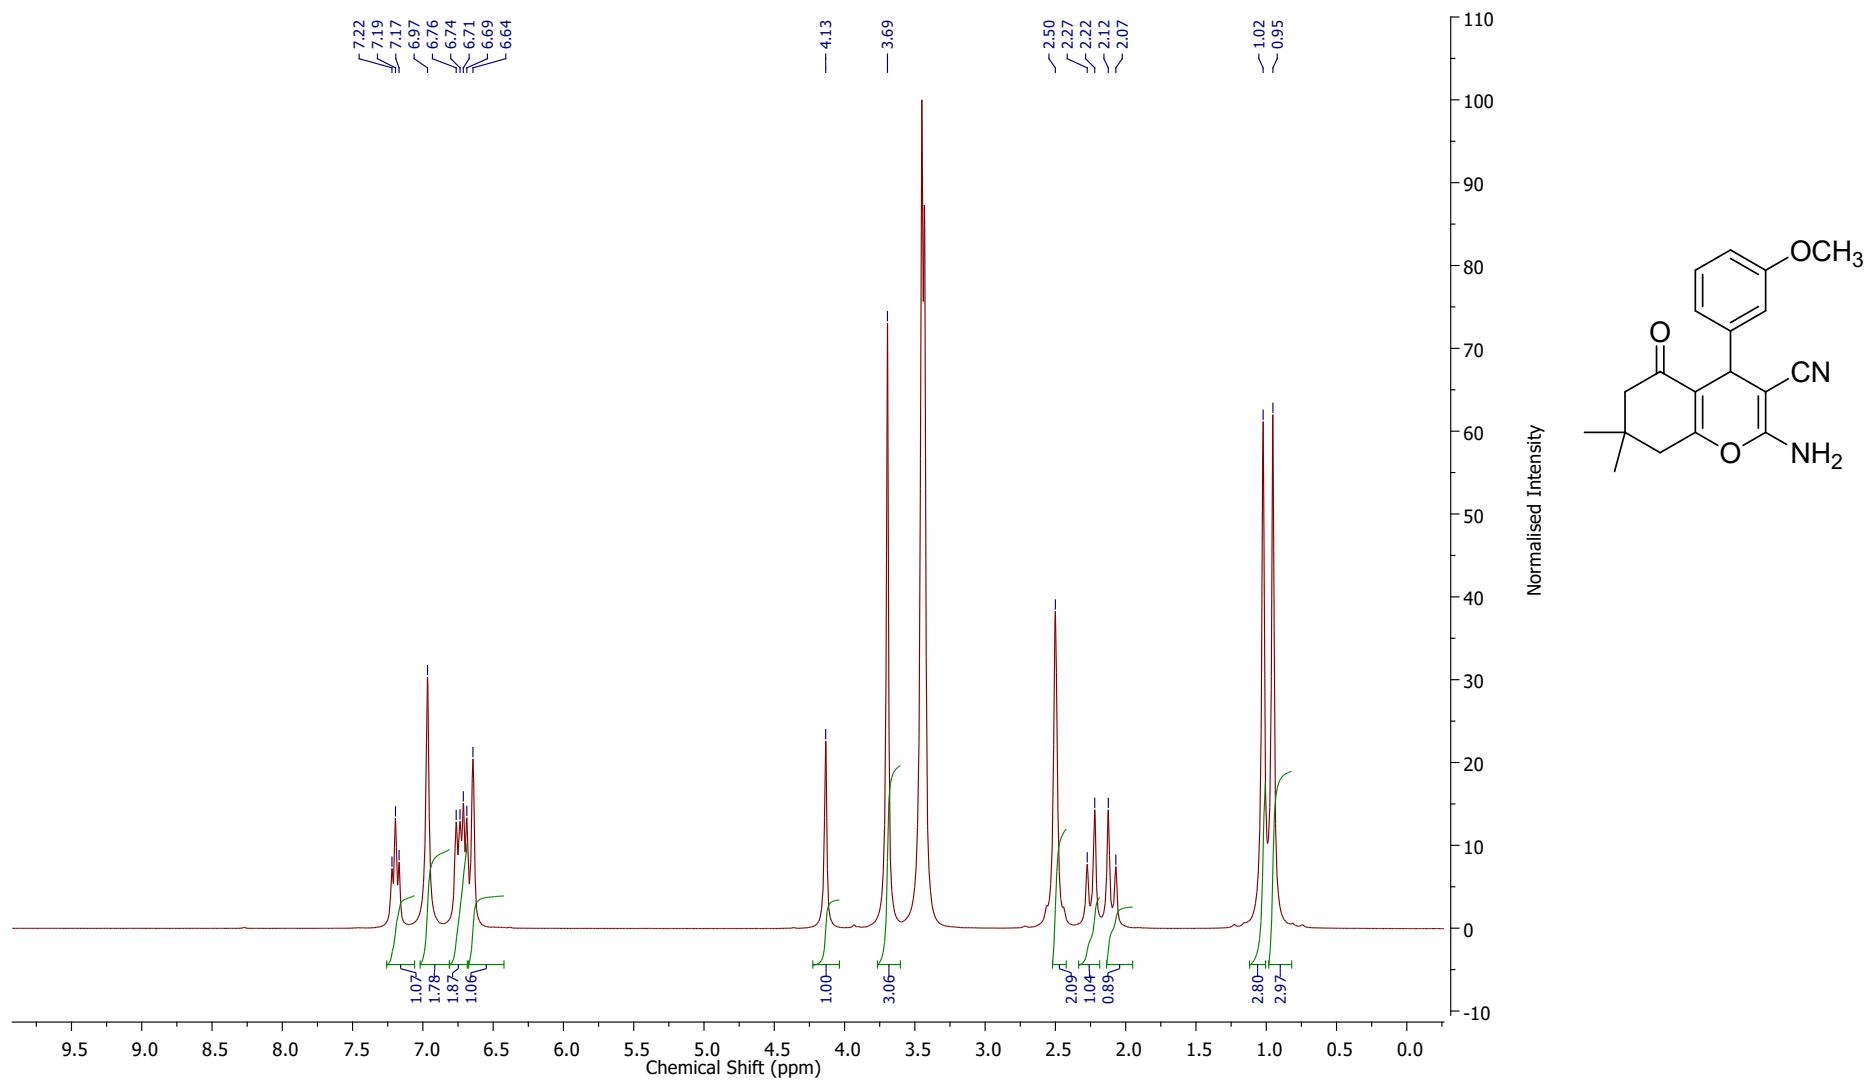

**<sup>13</sup>C NMR Spectrum of 4d**

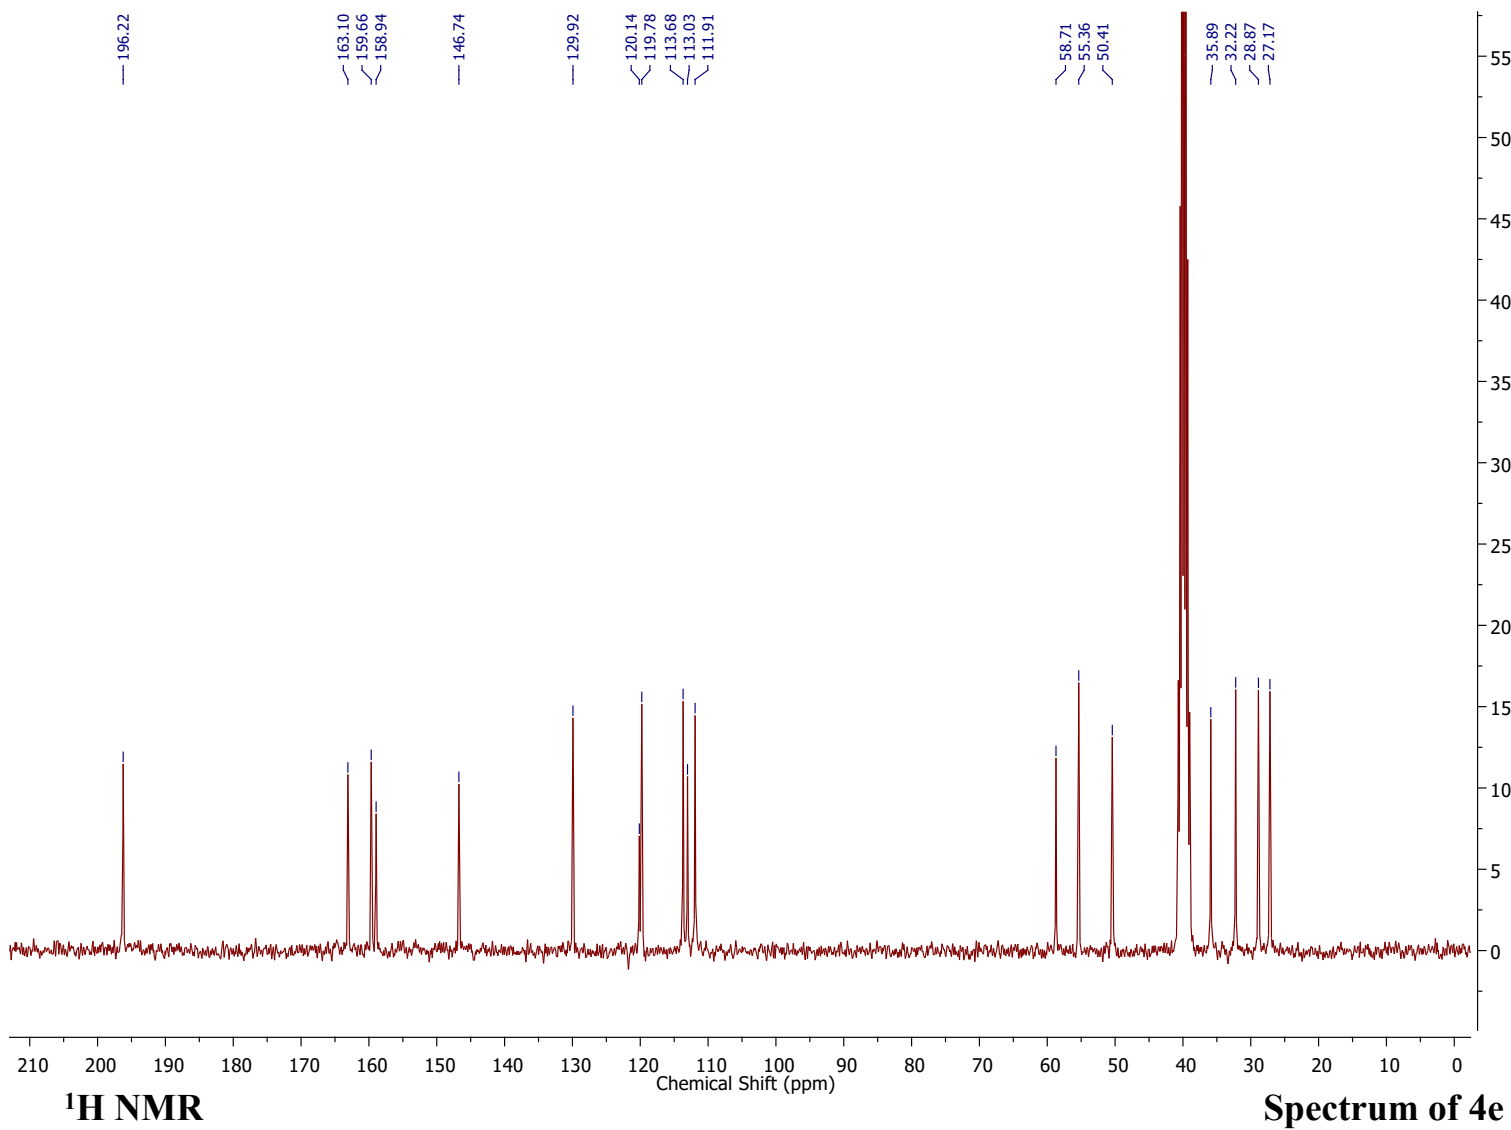

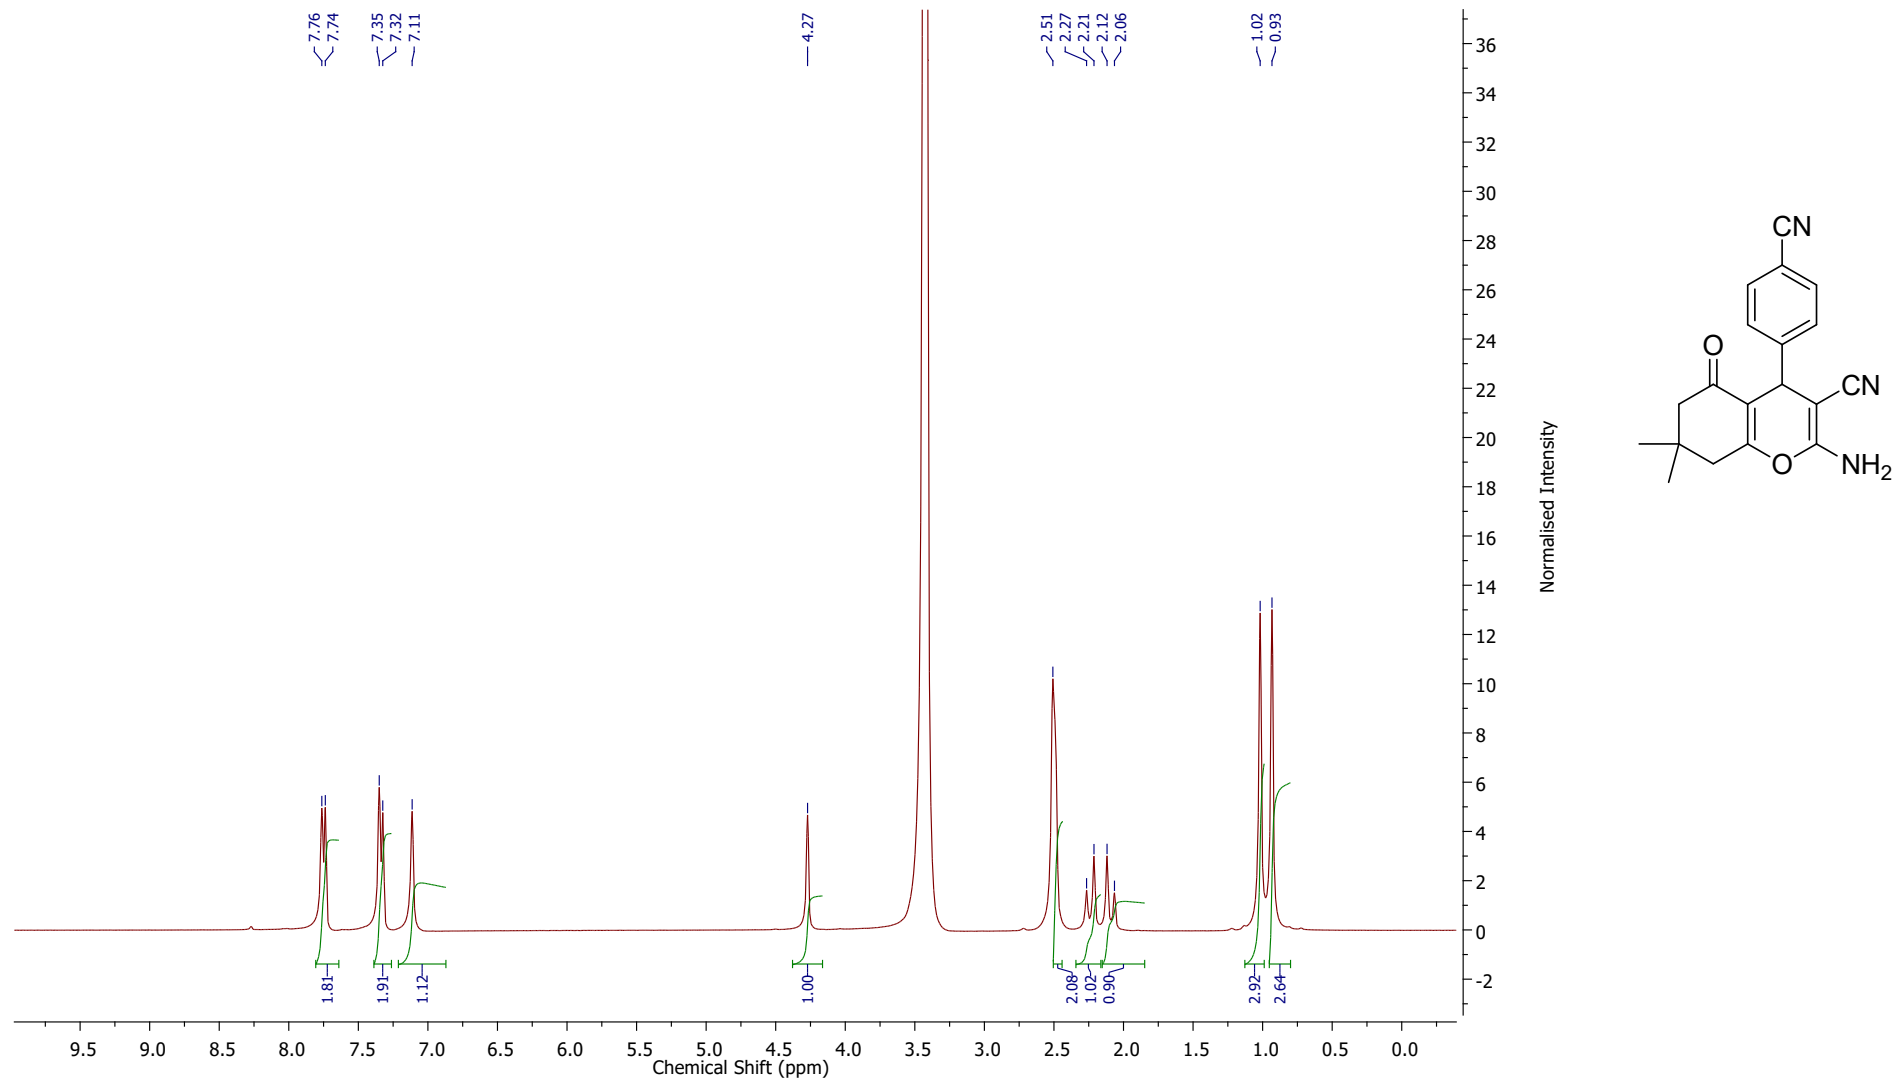

**<sup>13</sup>C NMR Spectrum of 4e**

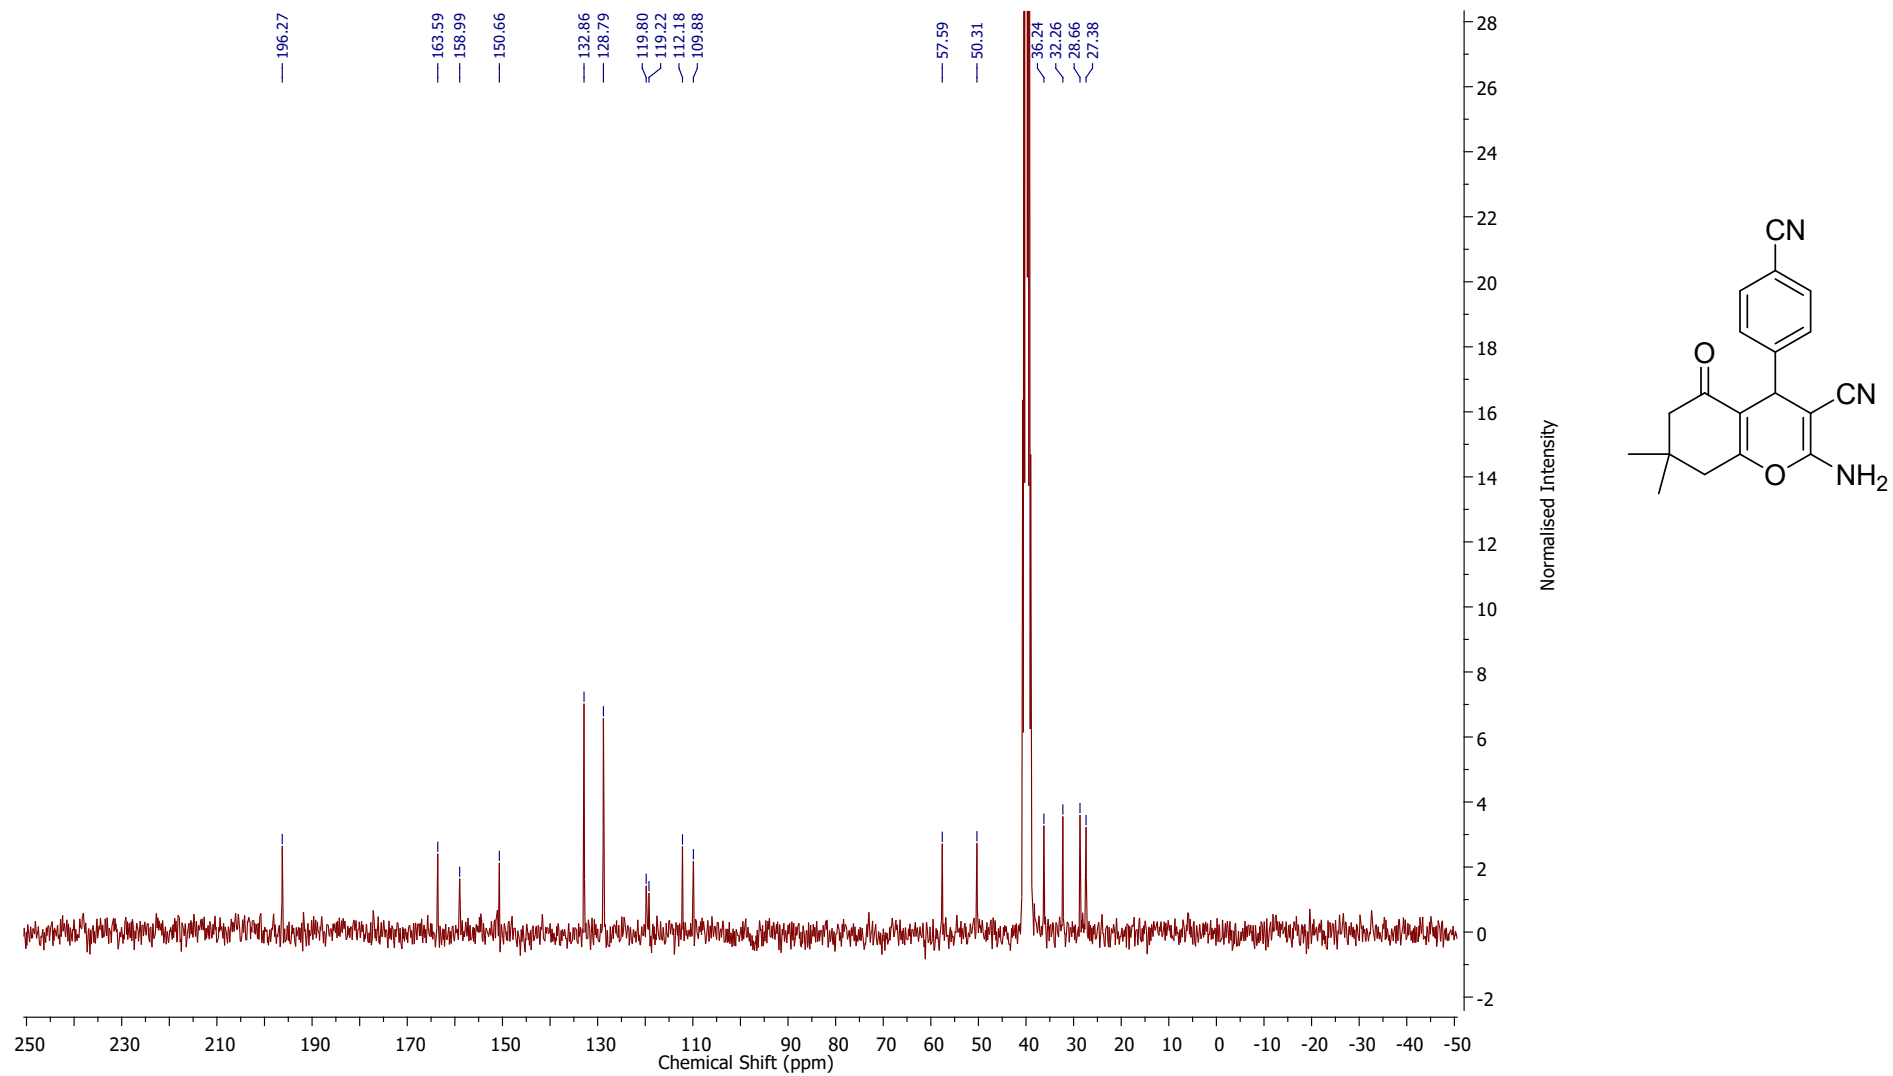

**<sup>1</sup>H NMR Spectrum of 4f**

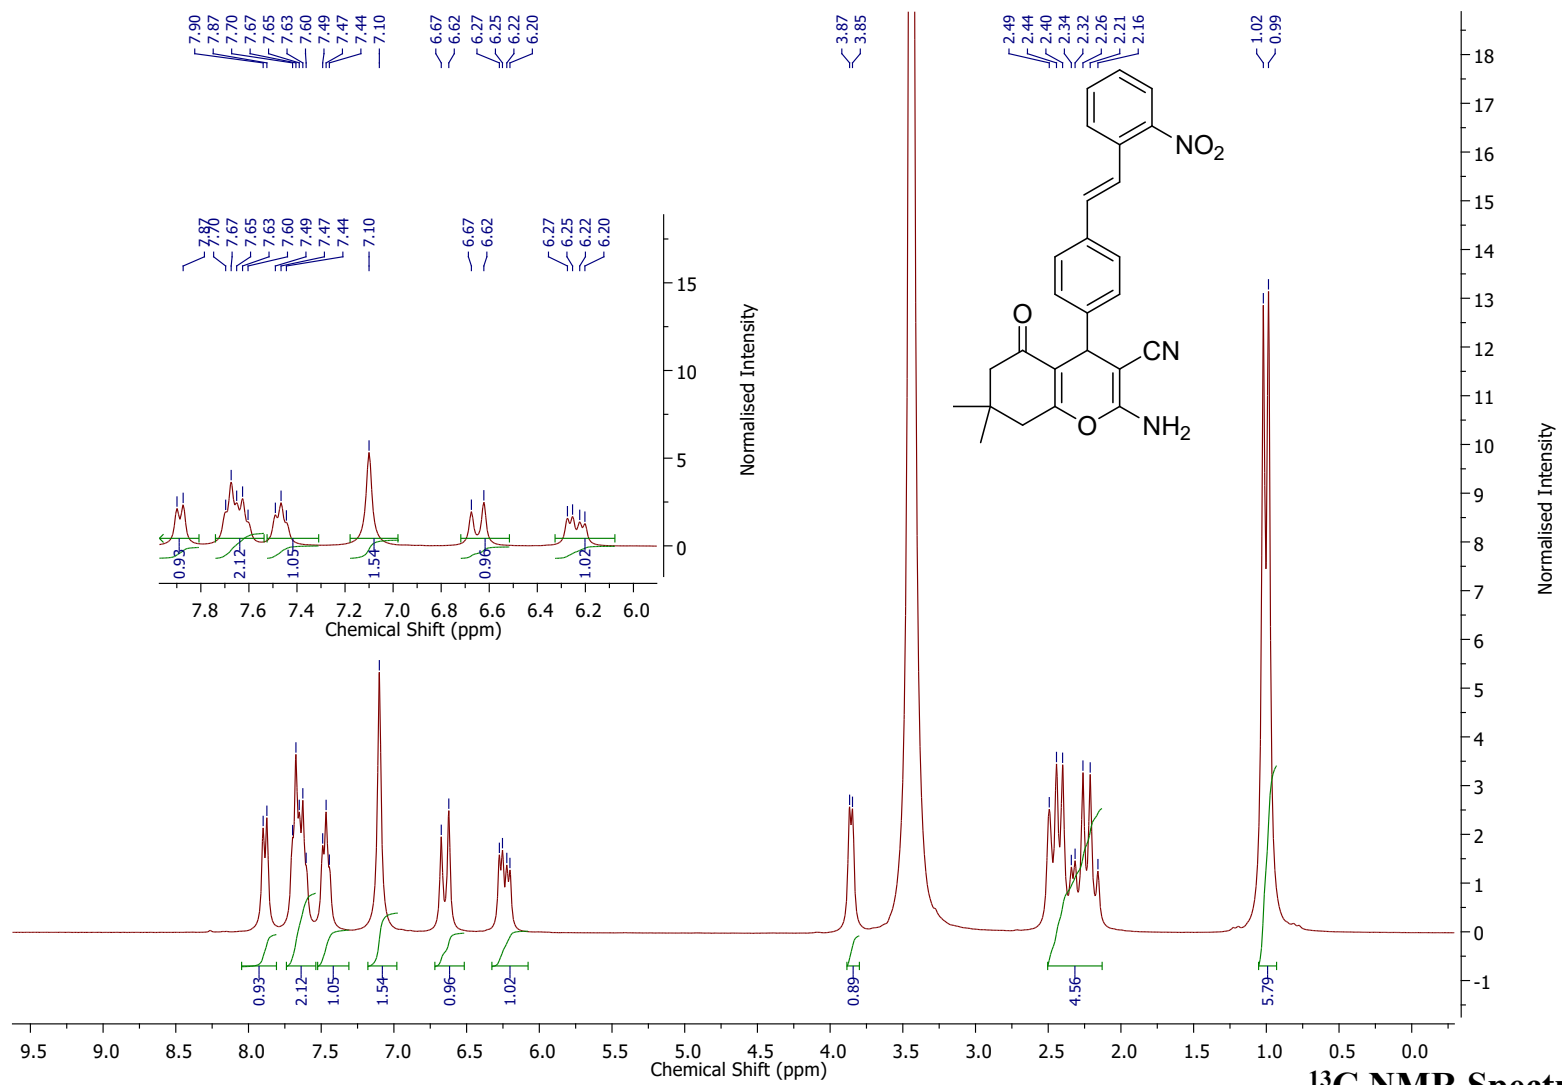**<sup>13</sup>C NMR Spectrum of 4f**

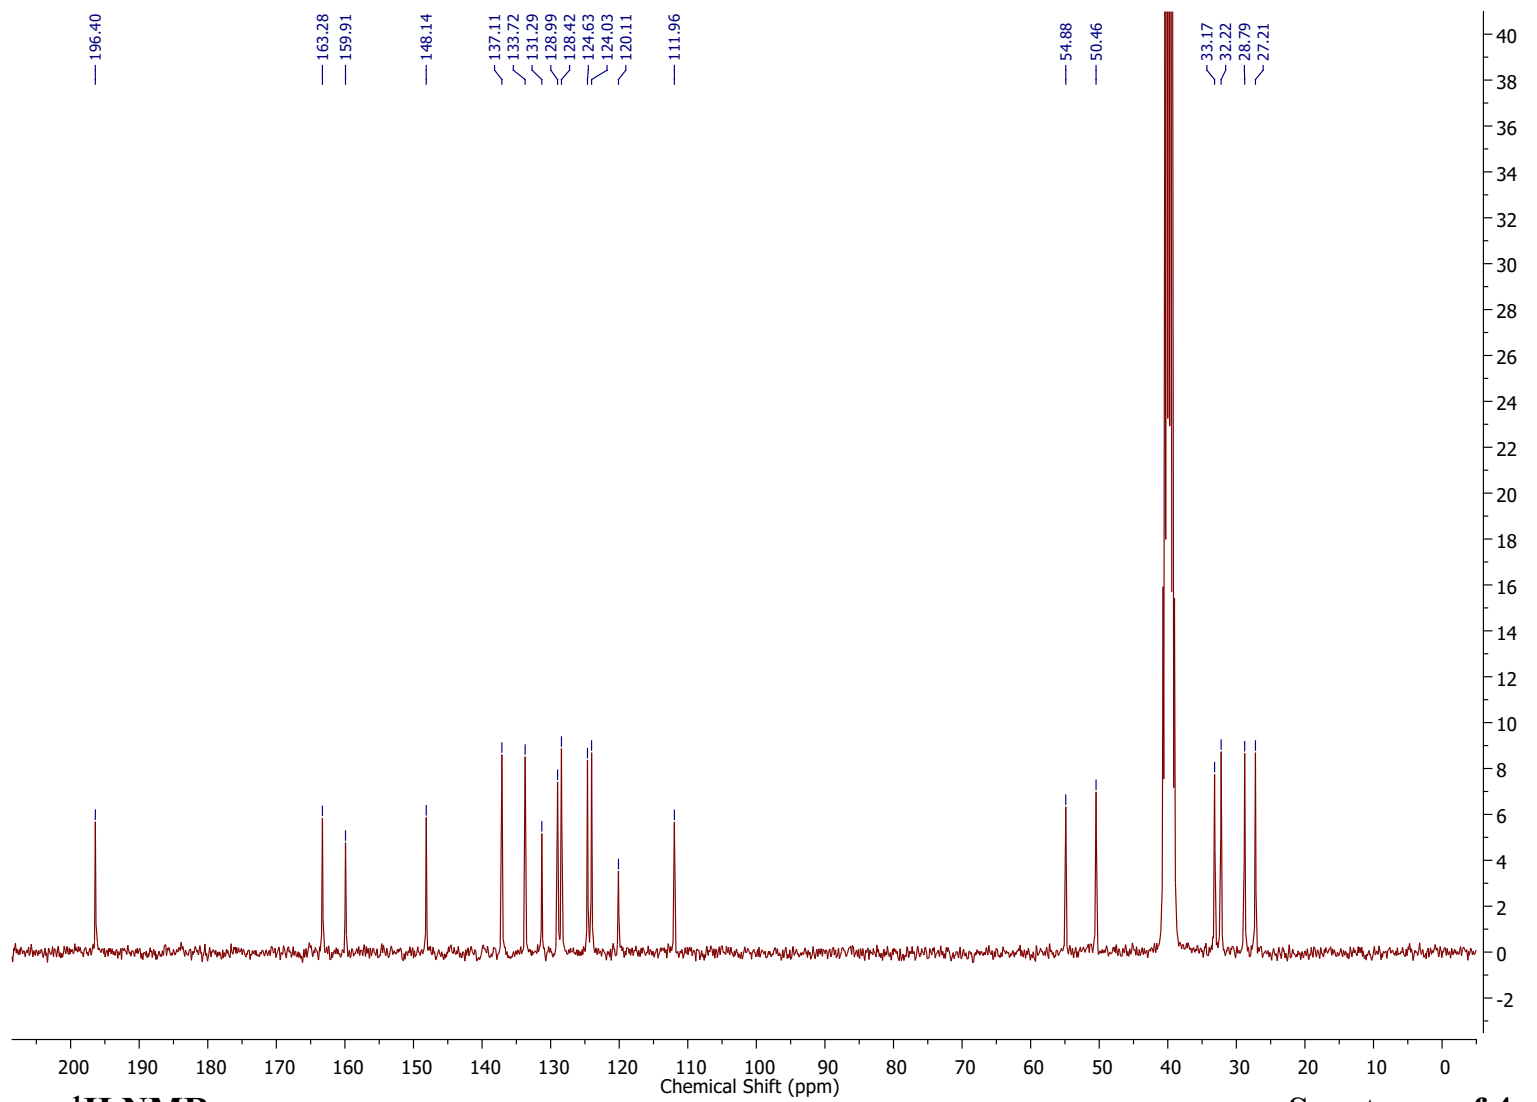

<sup>1</sup>H NMR

Spectrum of 4g

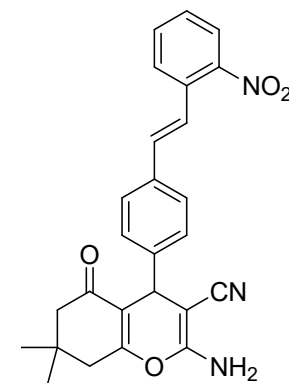

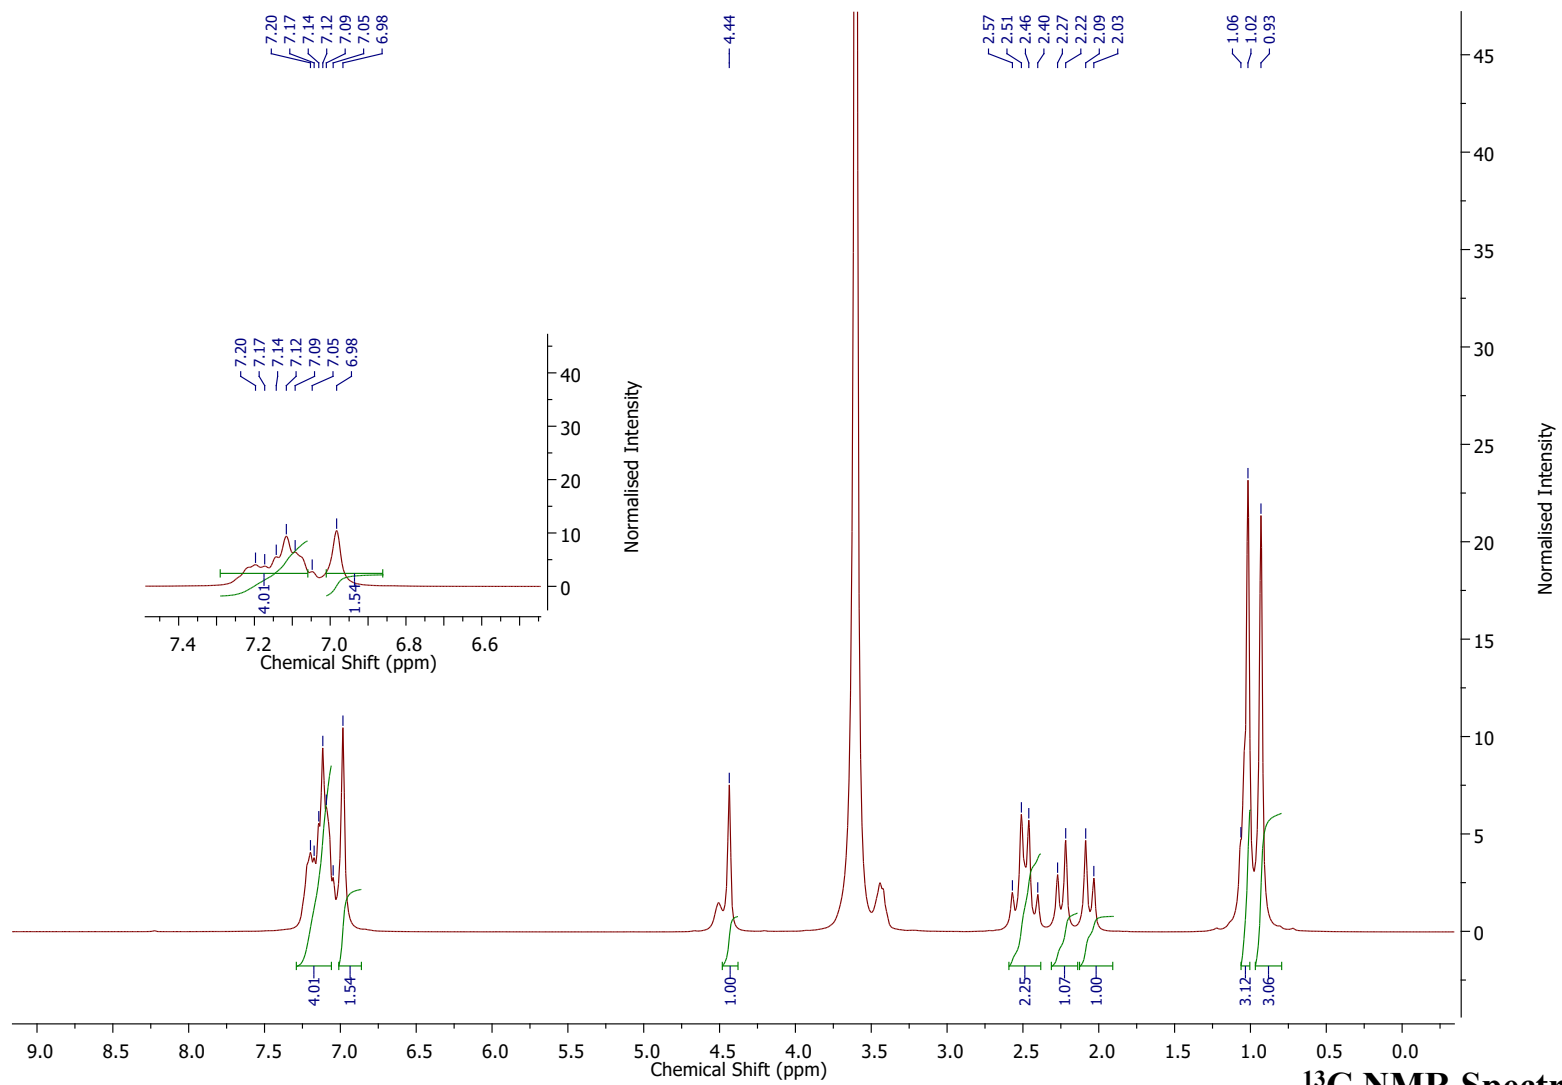 $^{13}\text{C}$  NMR Spectrum of 4g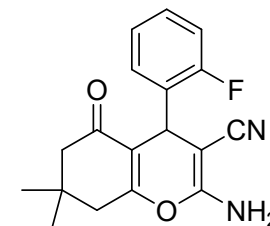

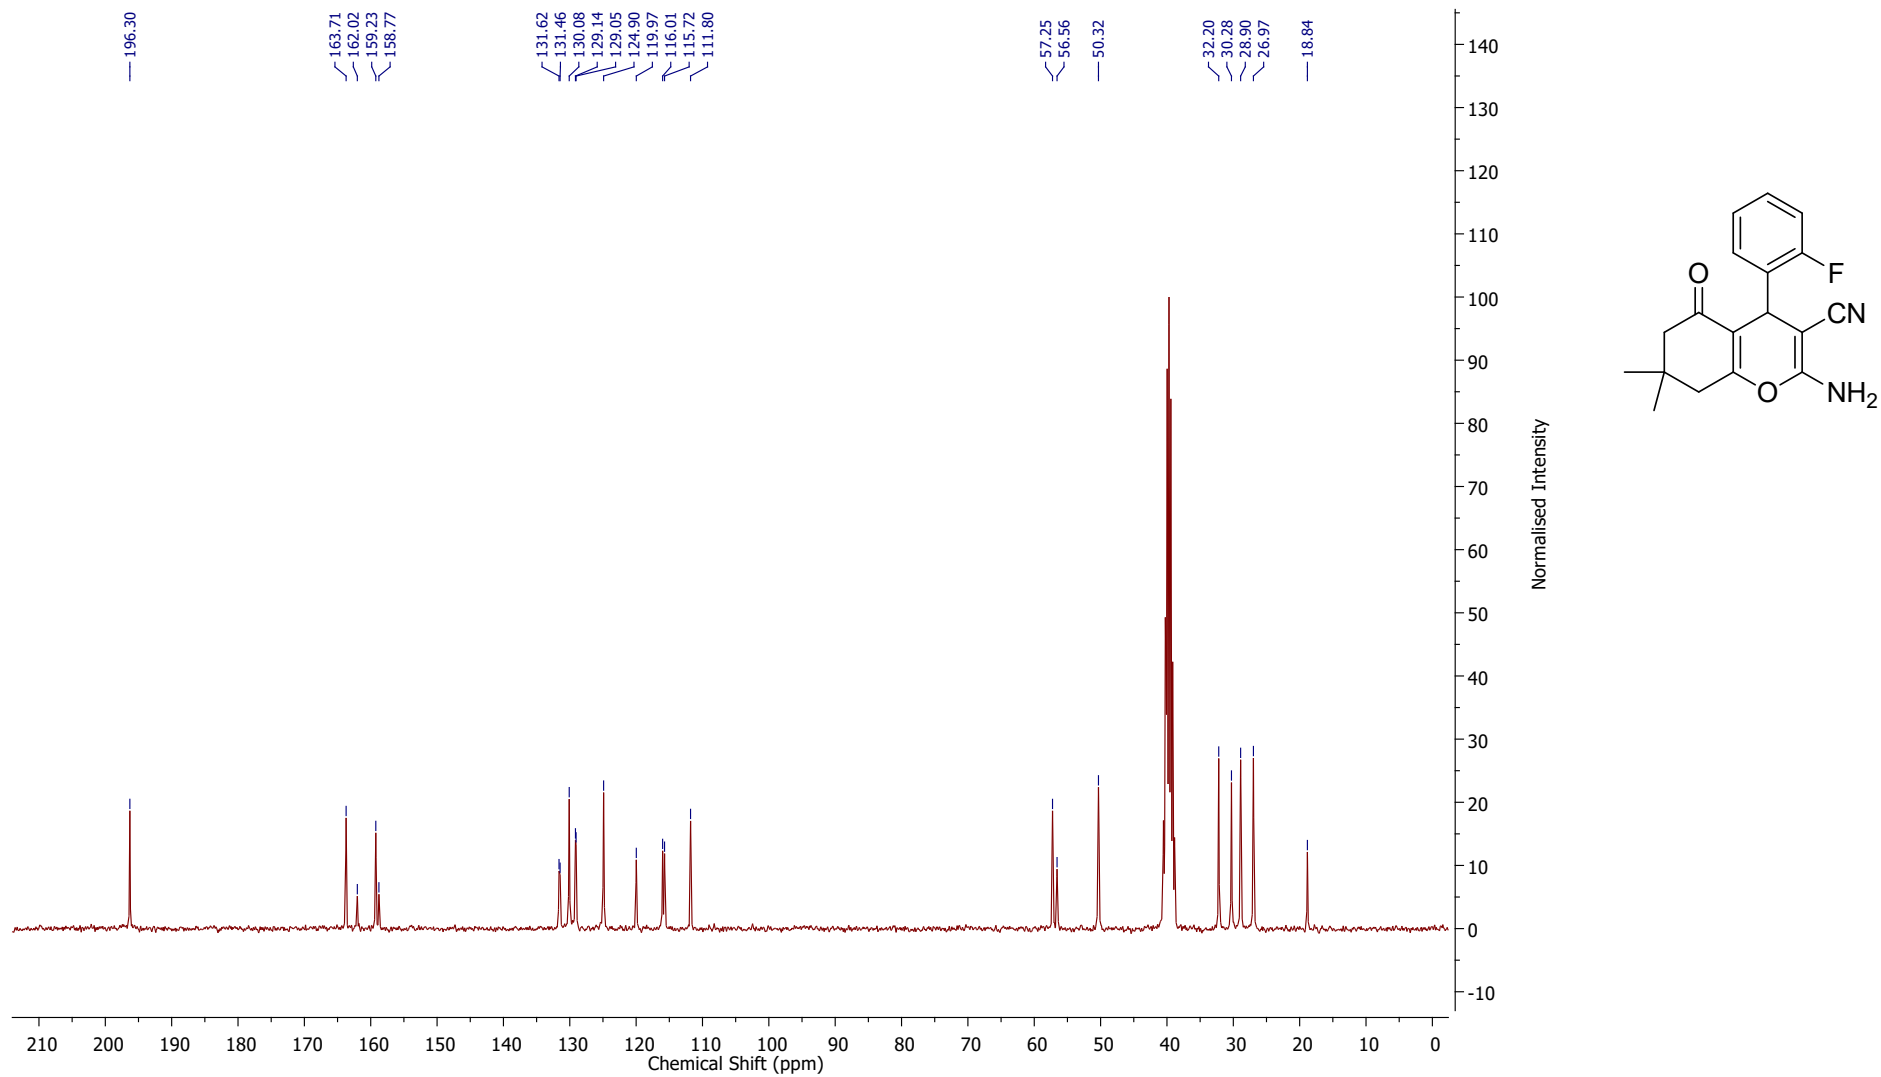

**<sup>1</sup>H NMR Spectrum of 4h**



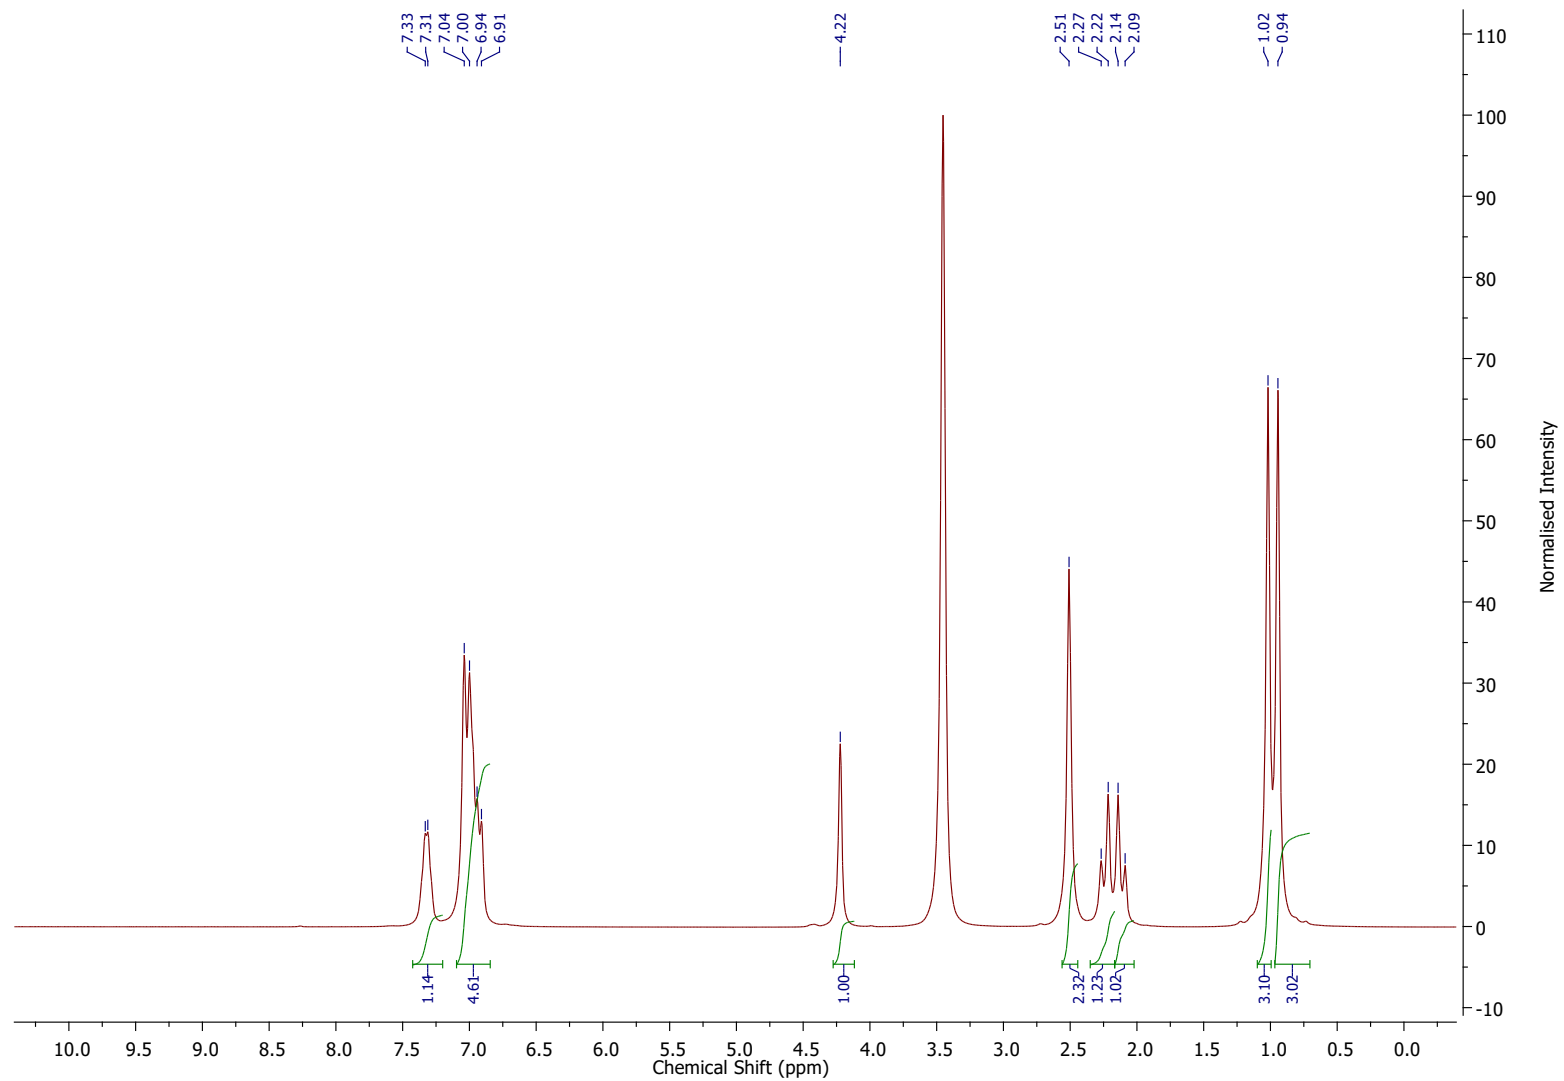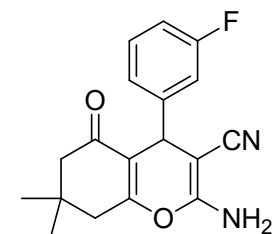

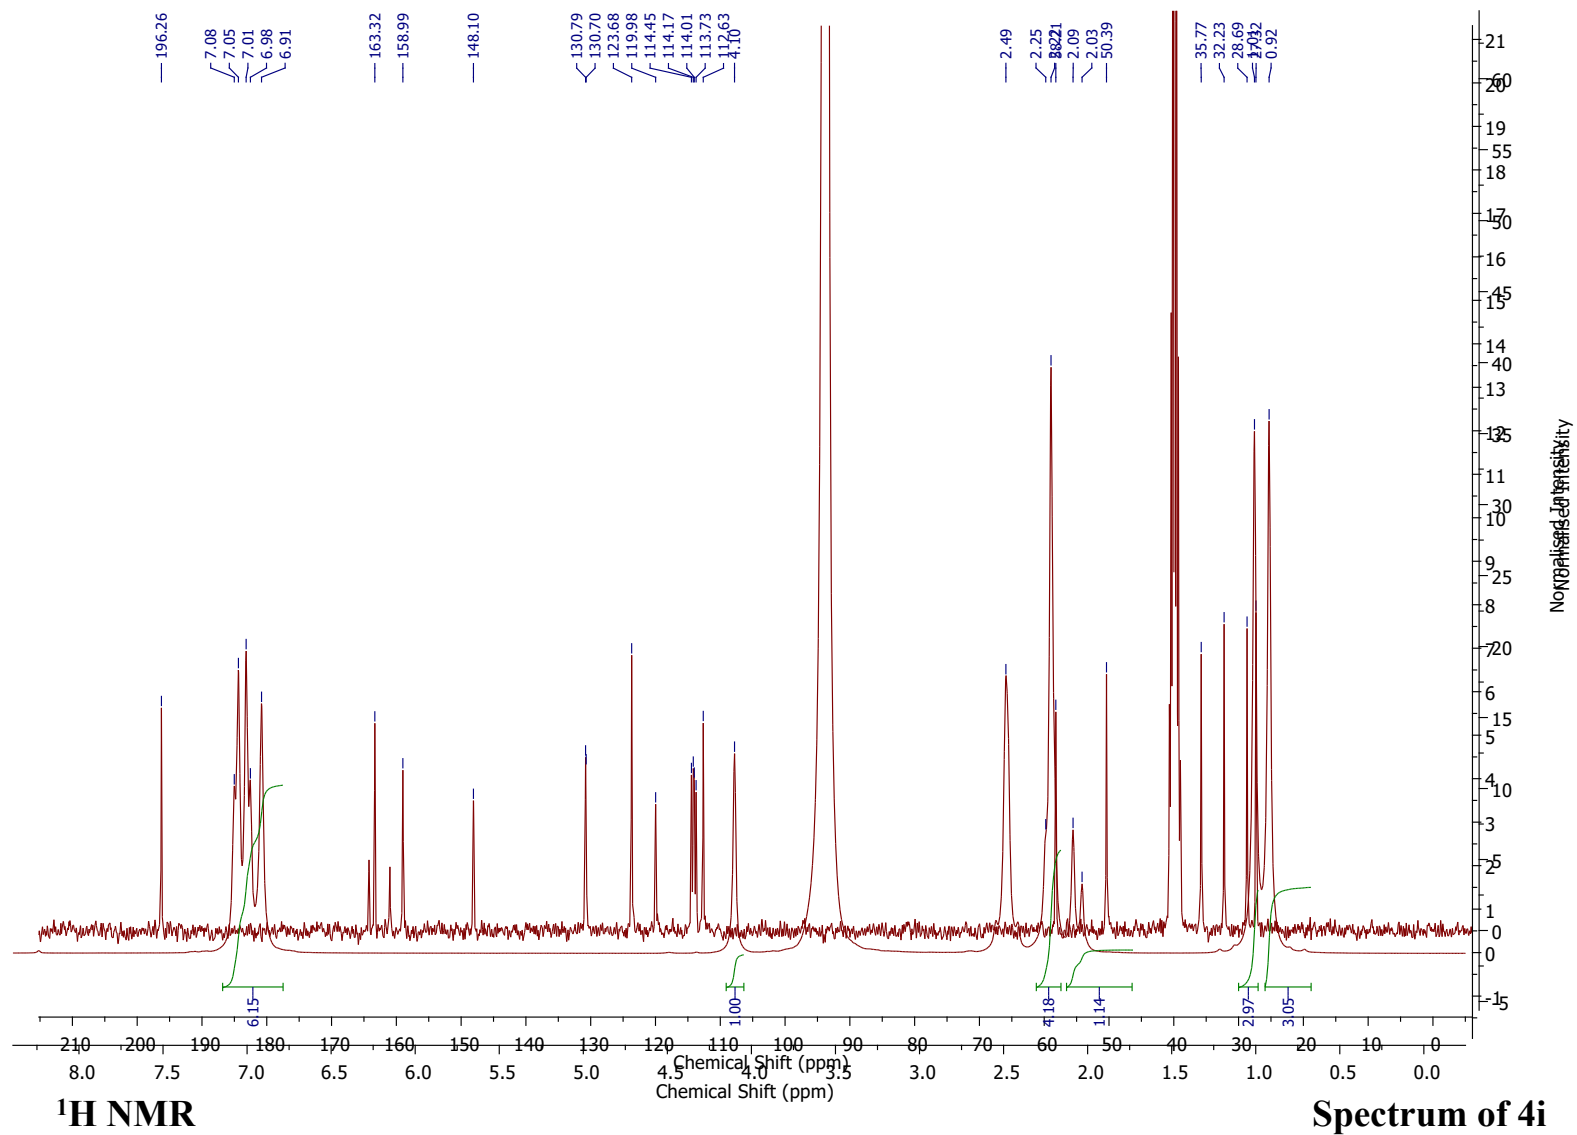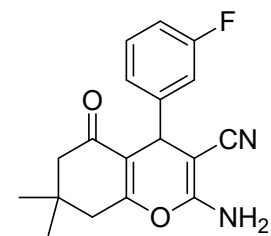

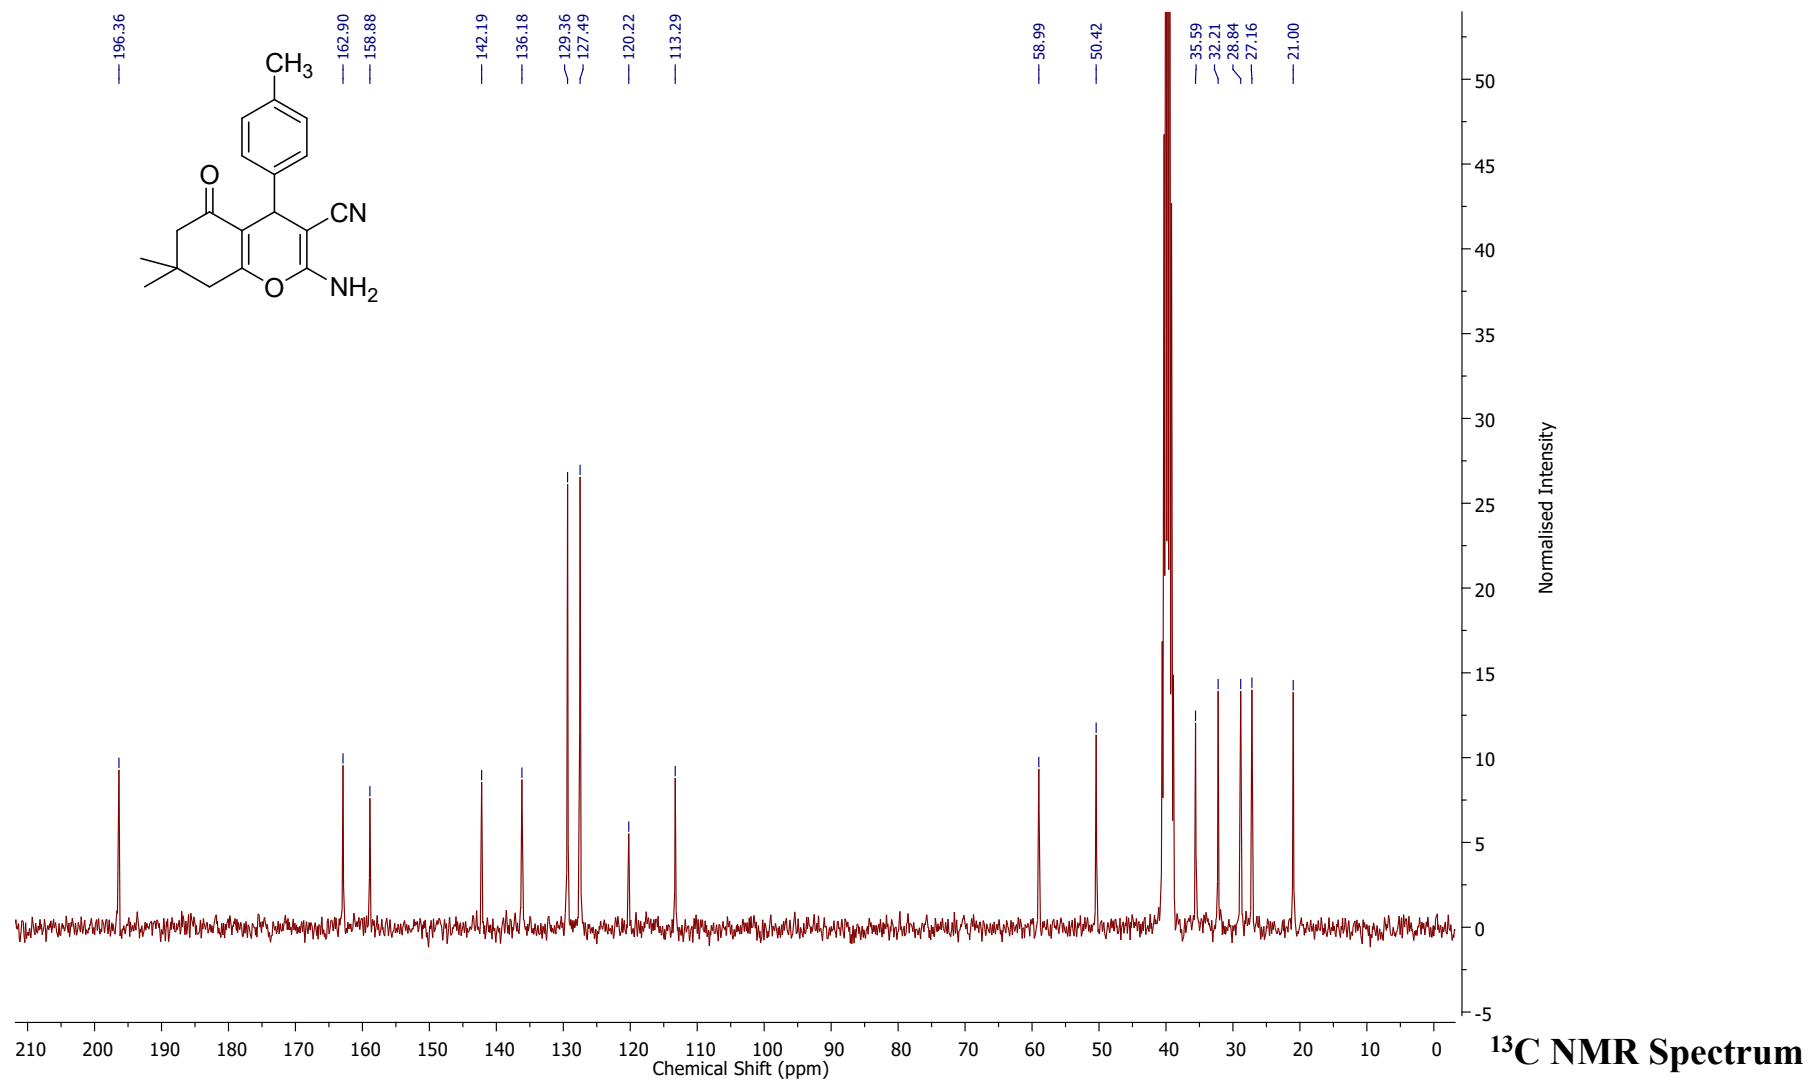

of 4i

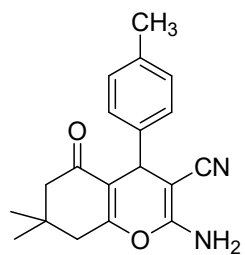

**<sup>1</sup>H NMR Spectrum of 4j**

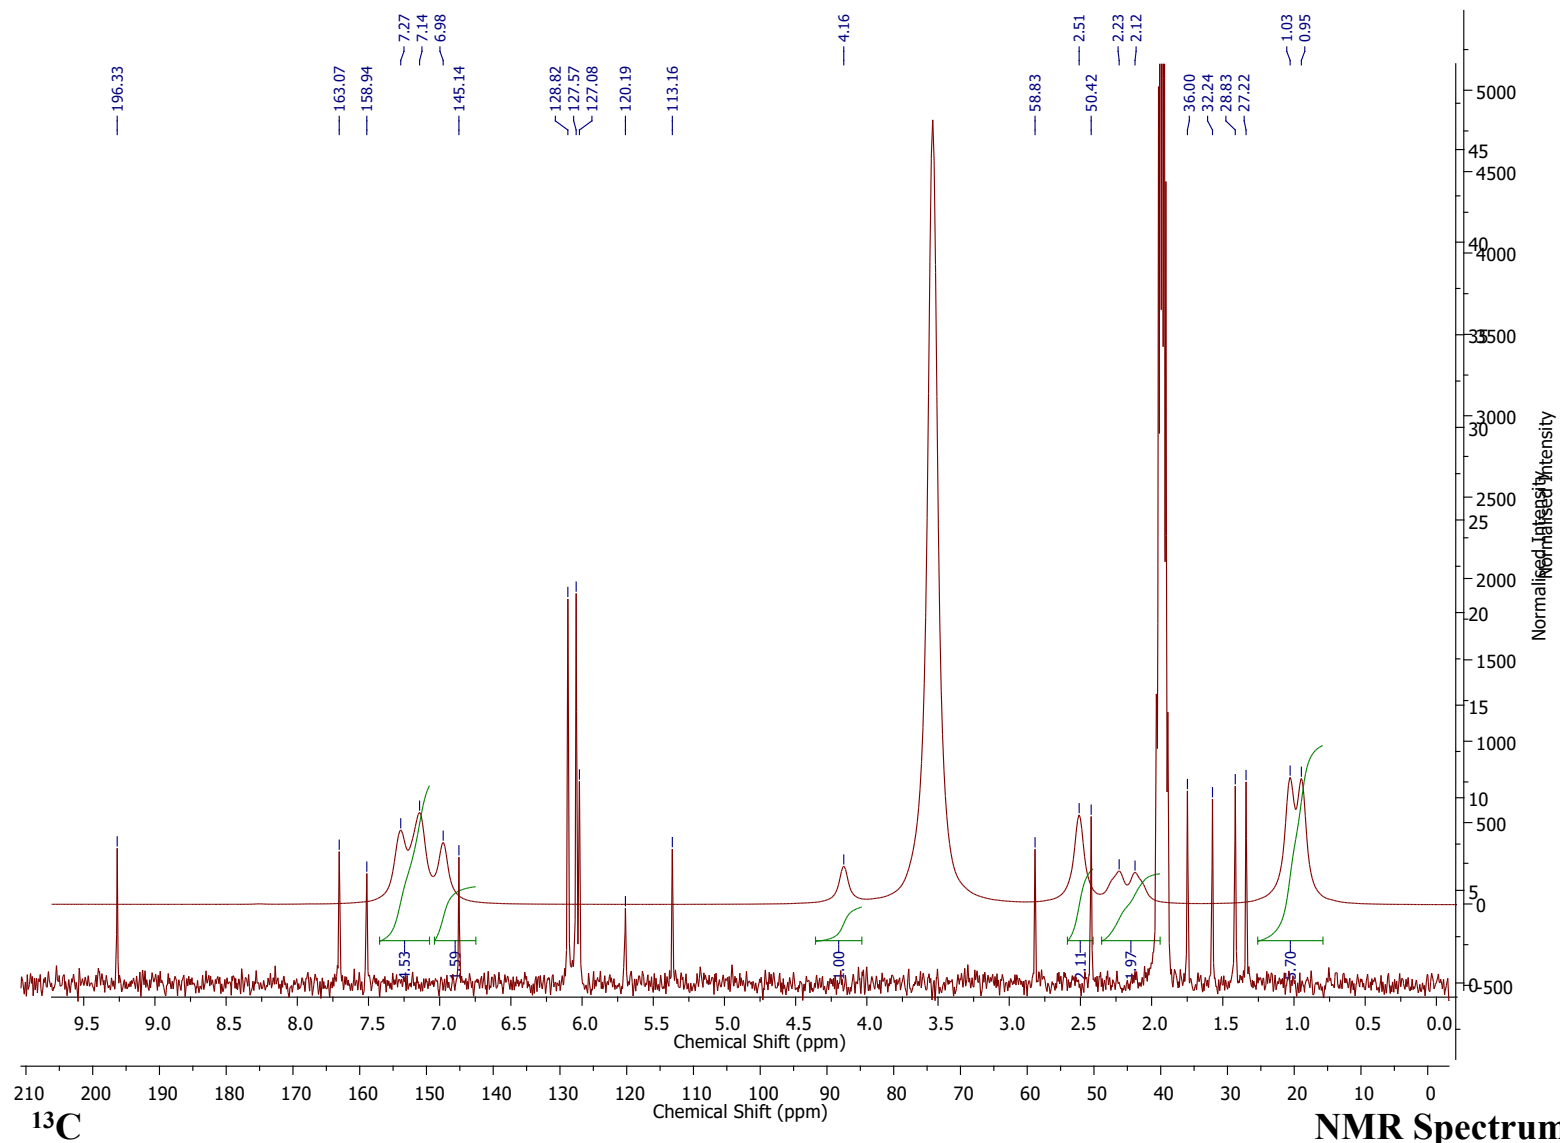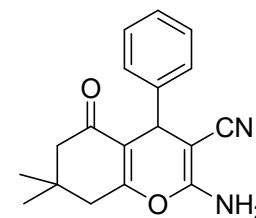

NMR Spectrum of 4j

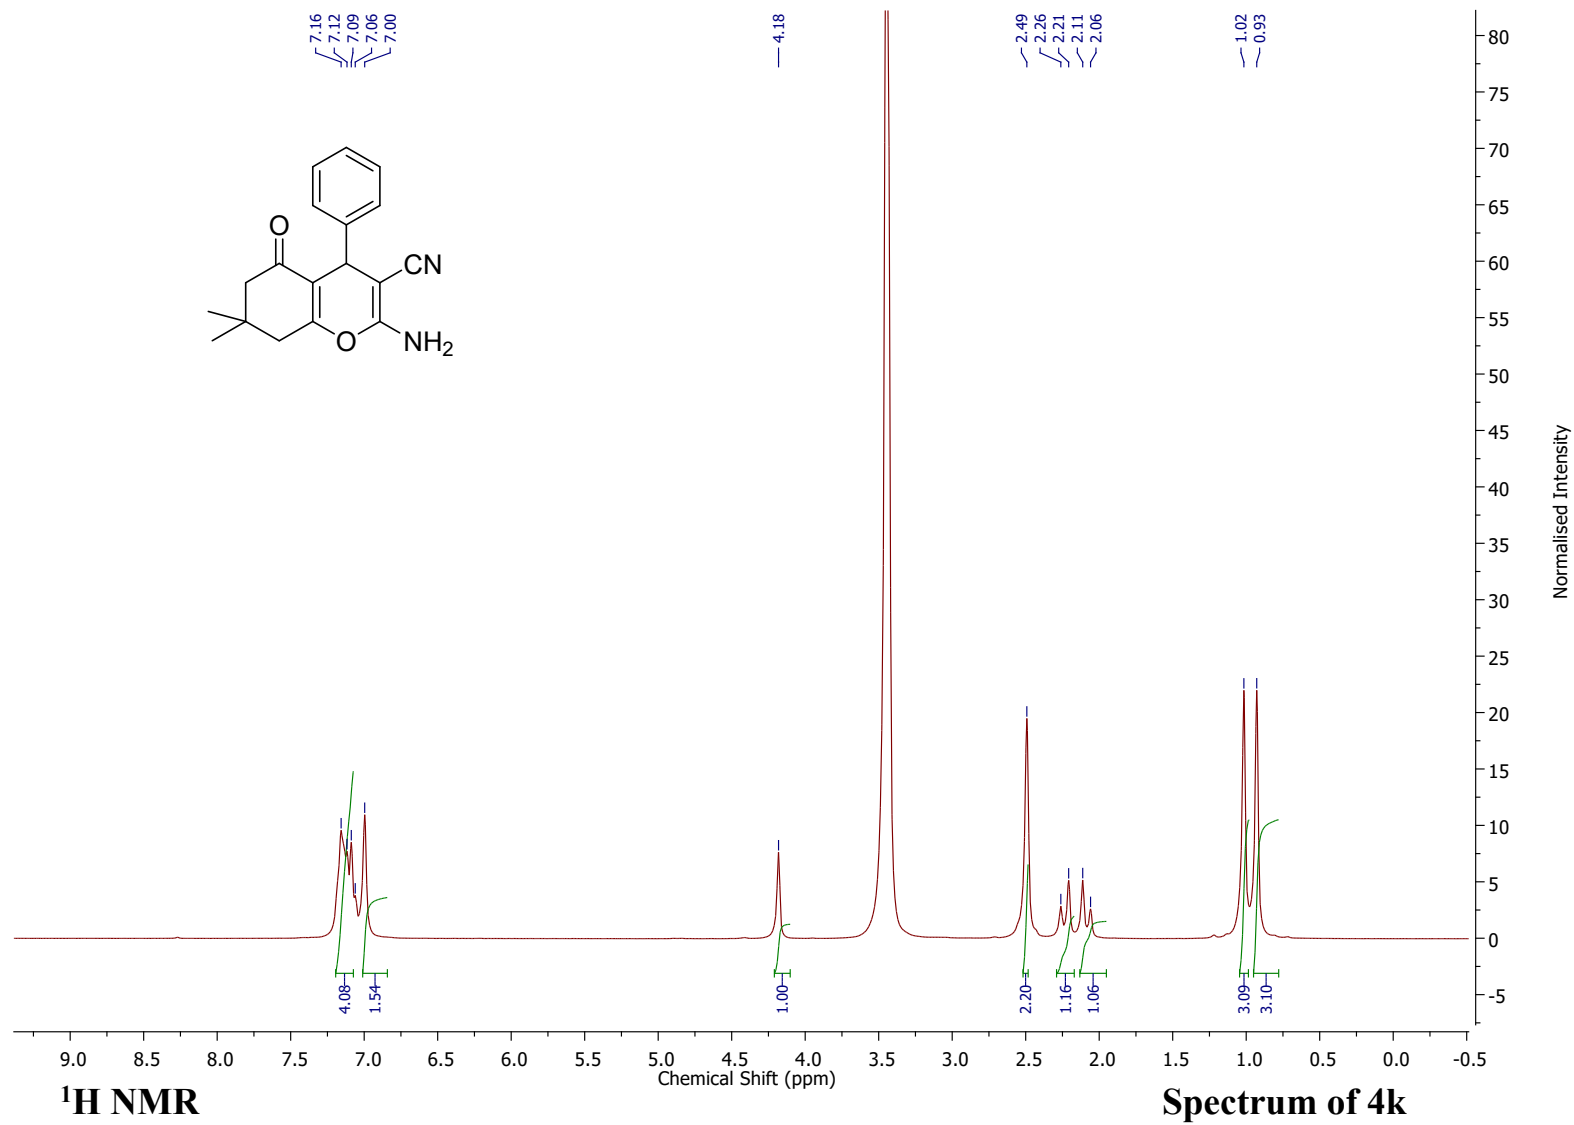

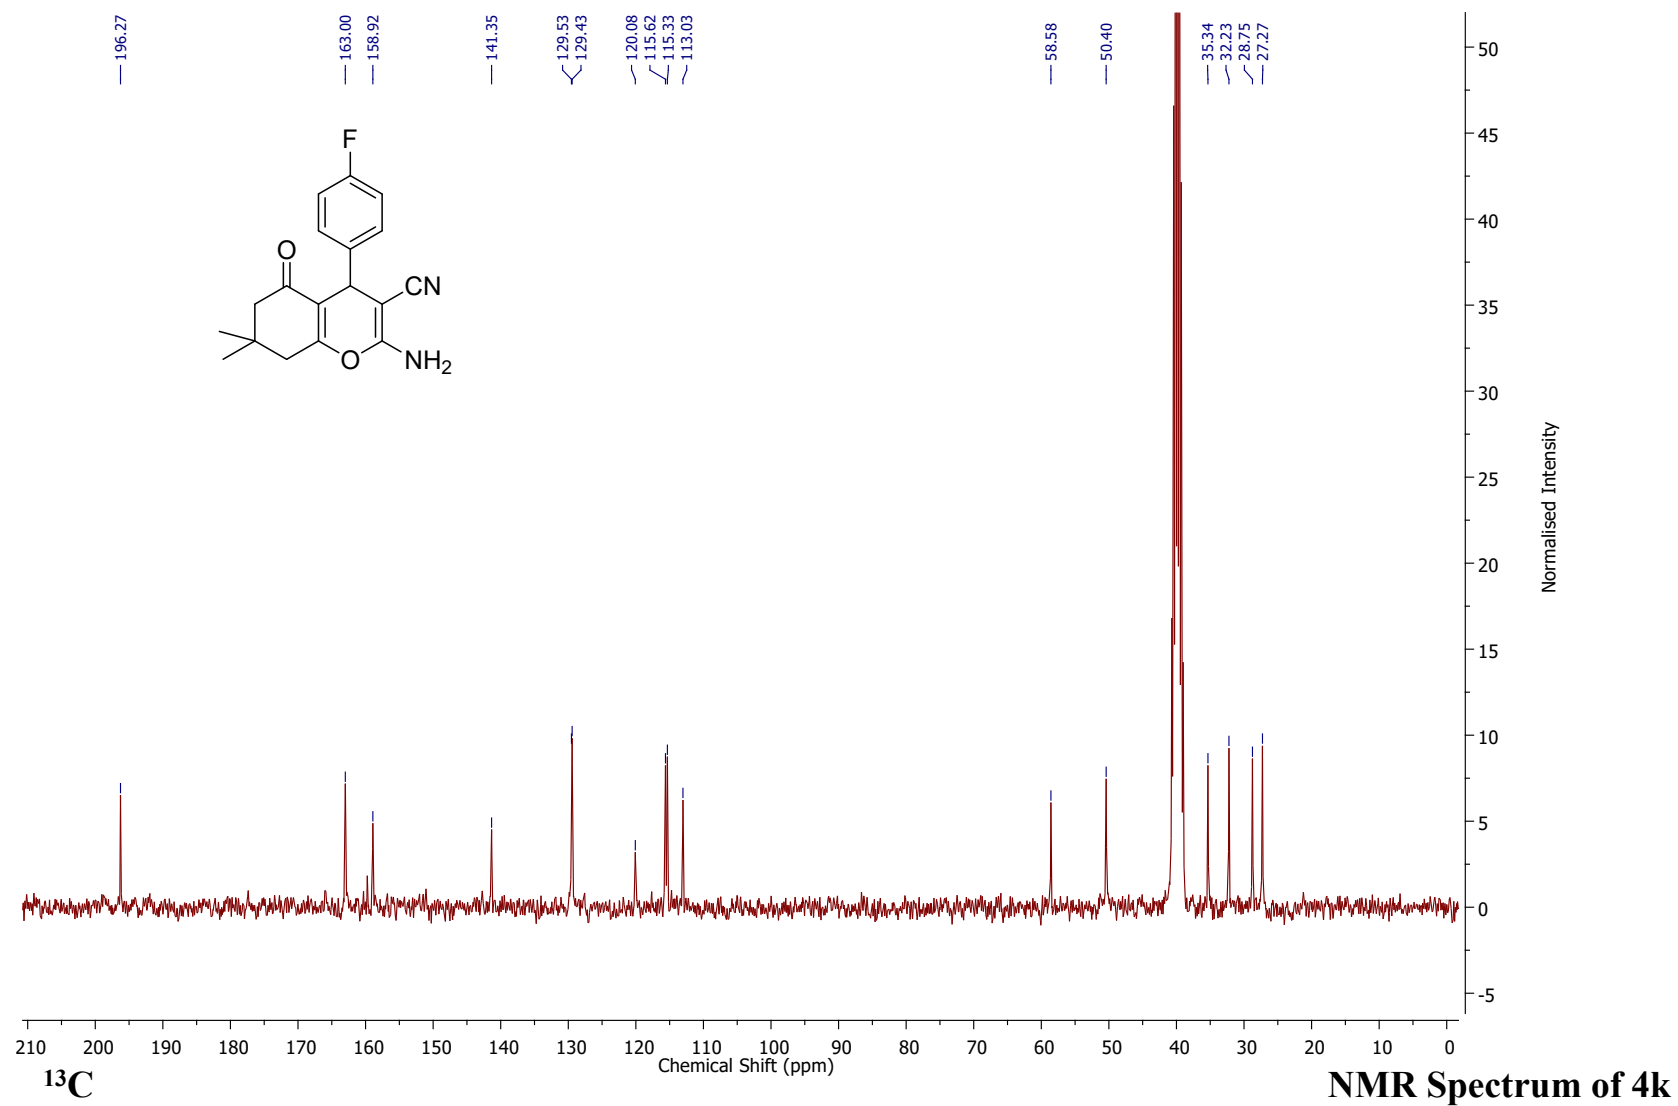

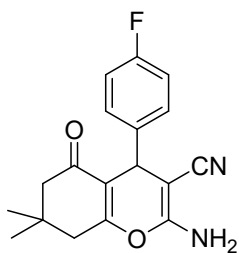

**<sup>1</sup>H NMR Spectrum of 5a**



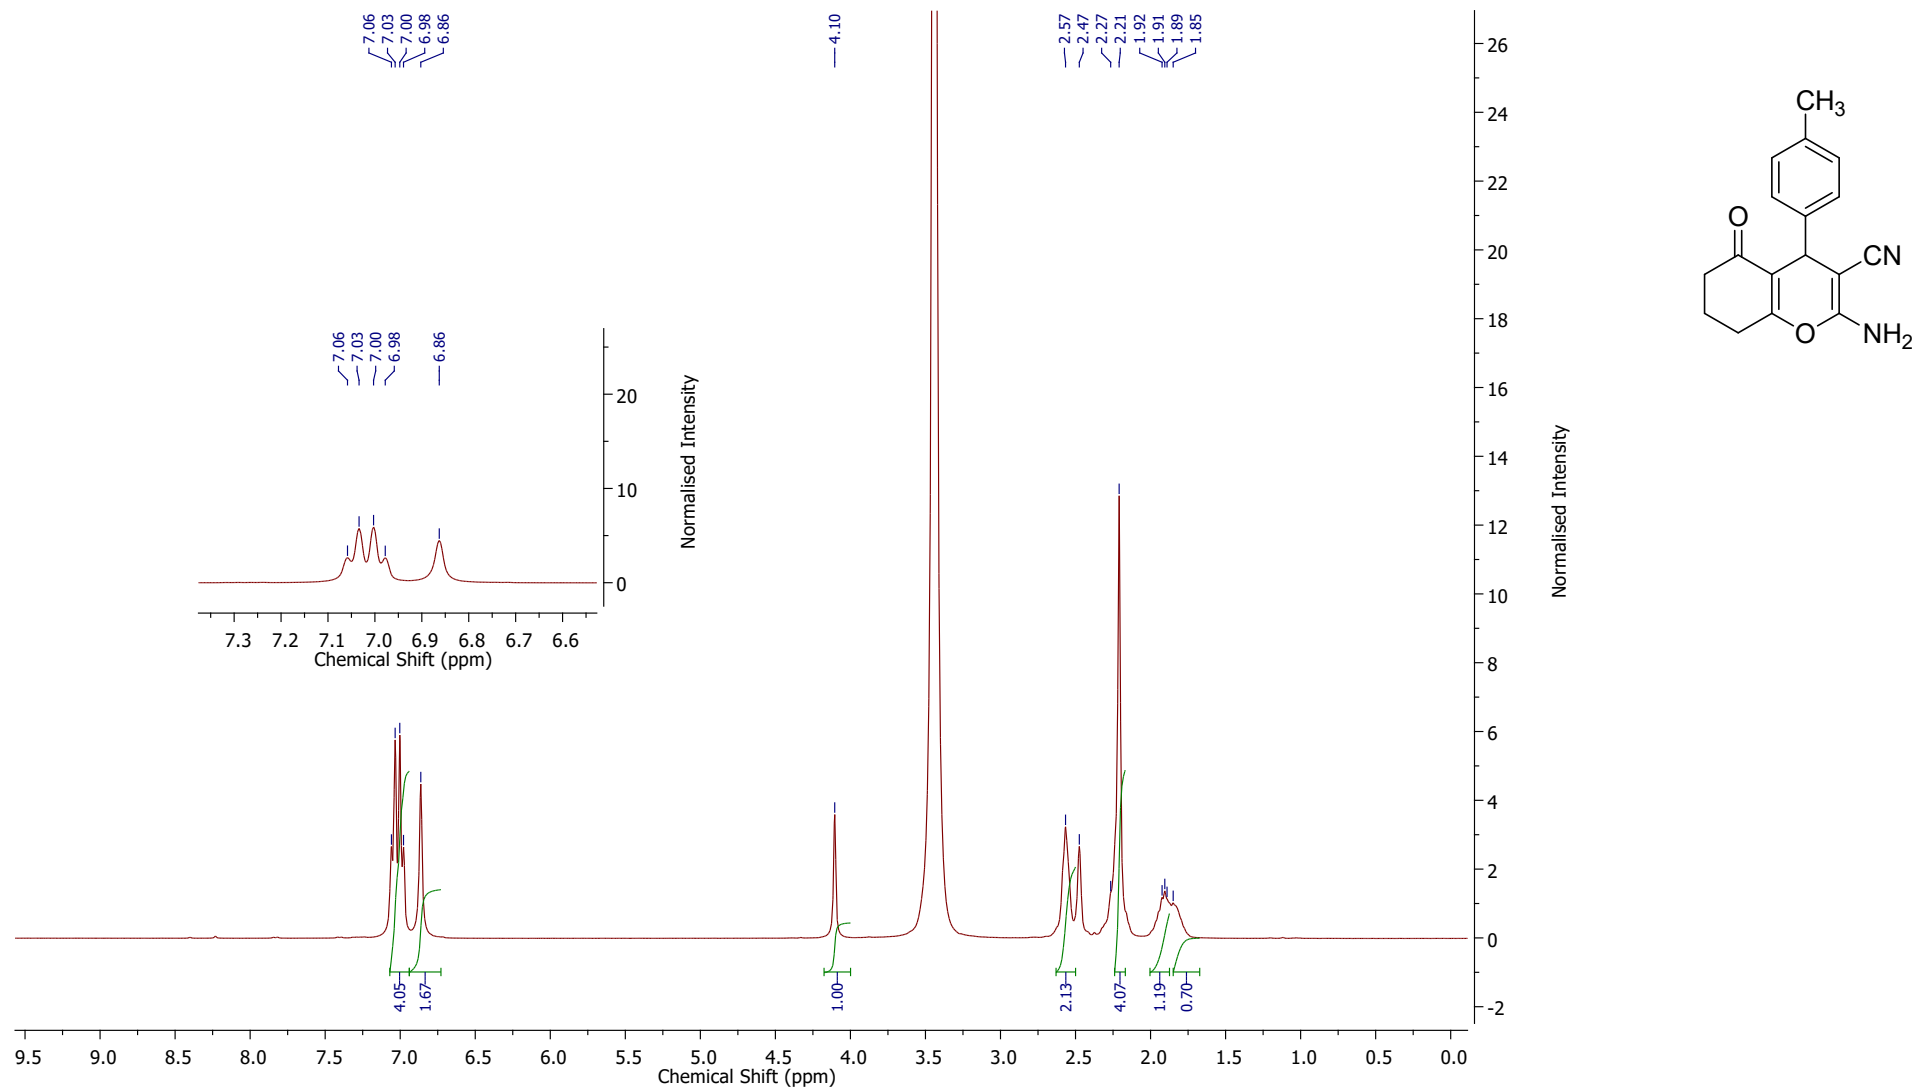

$^{13}\text{C}$  NMR Spectrum of 5a

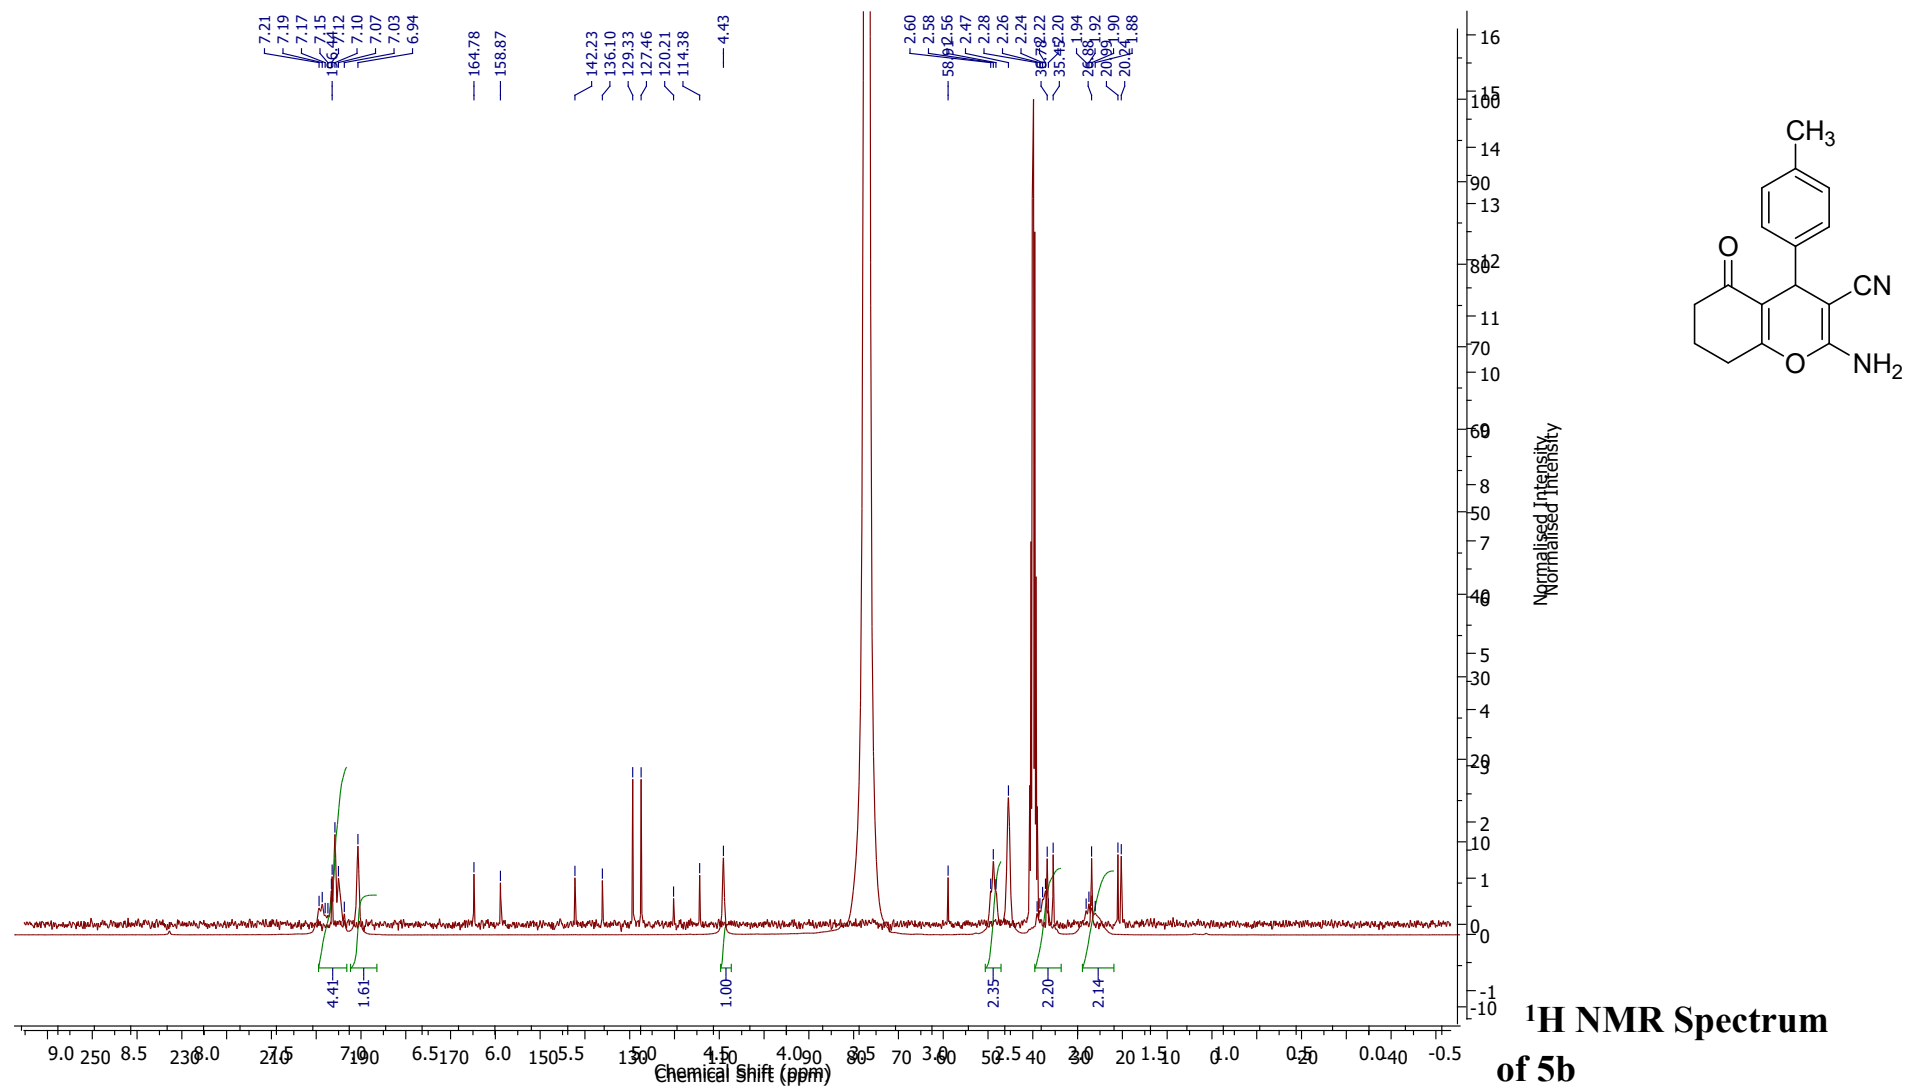

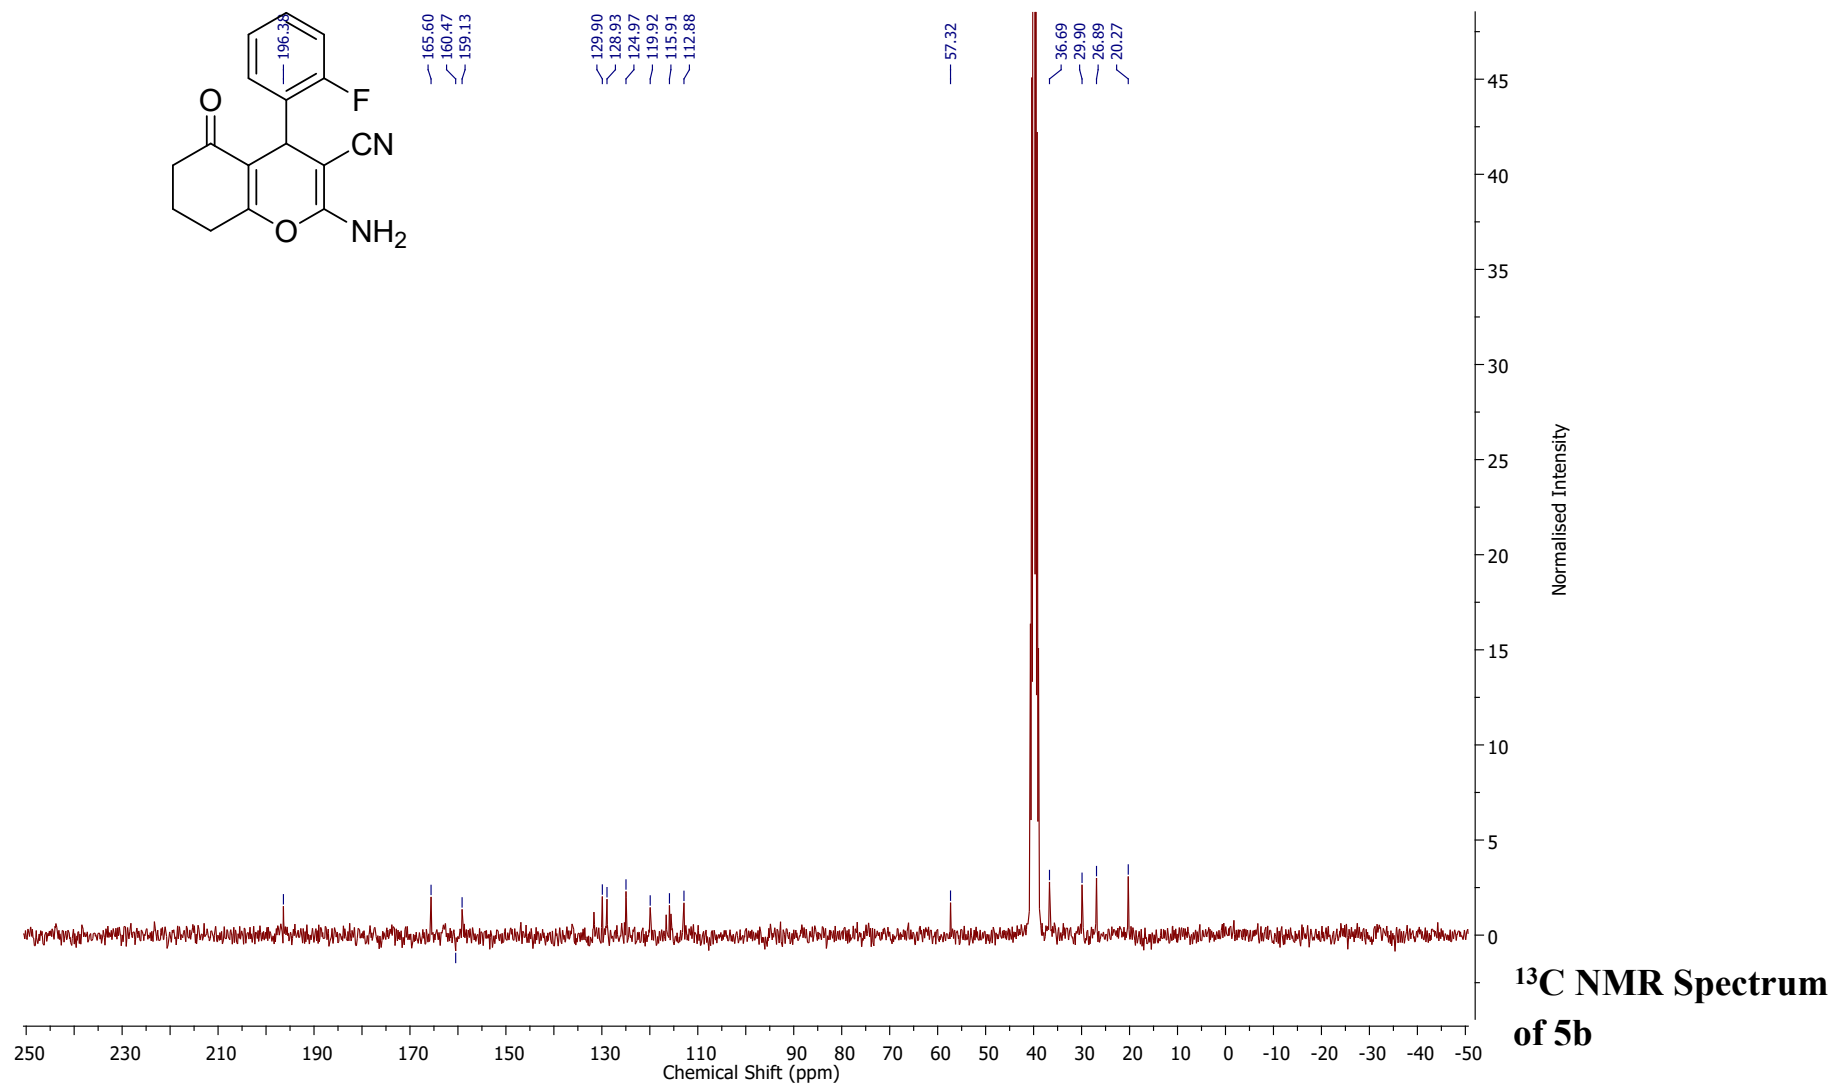

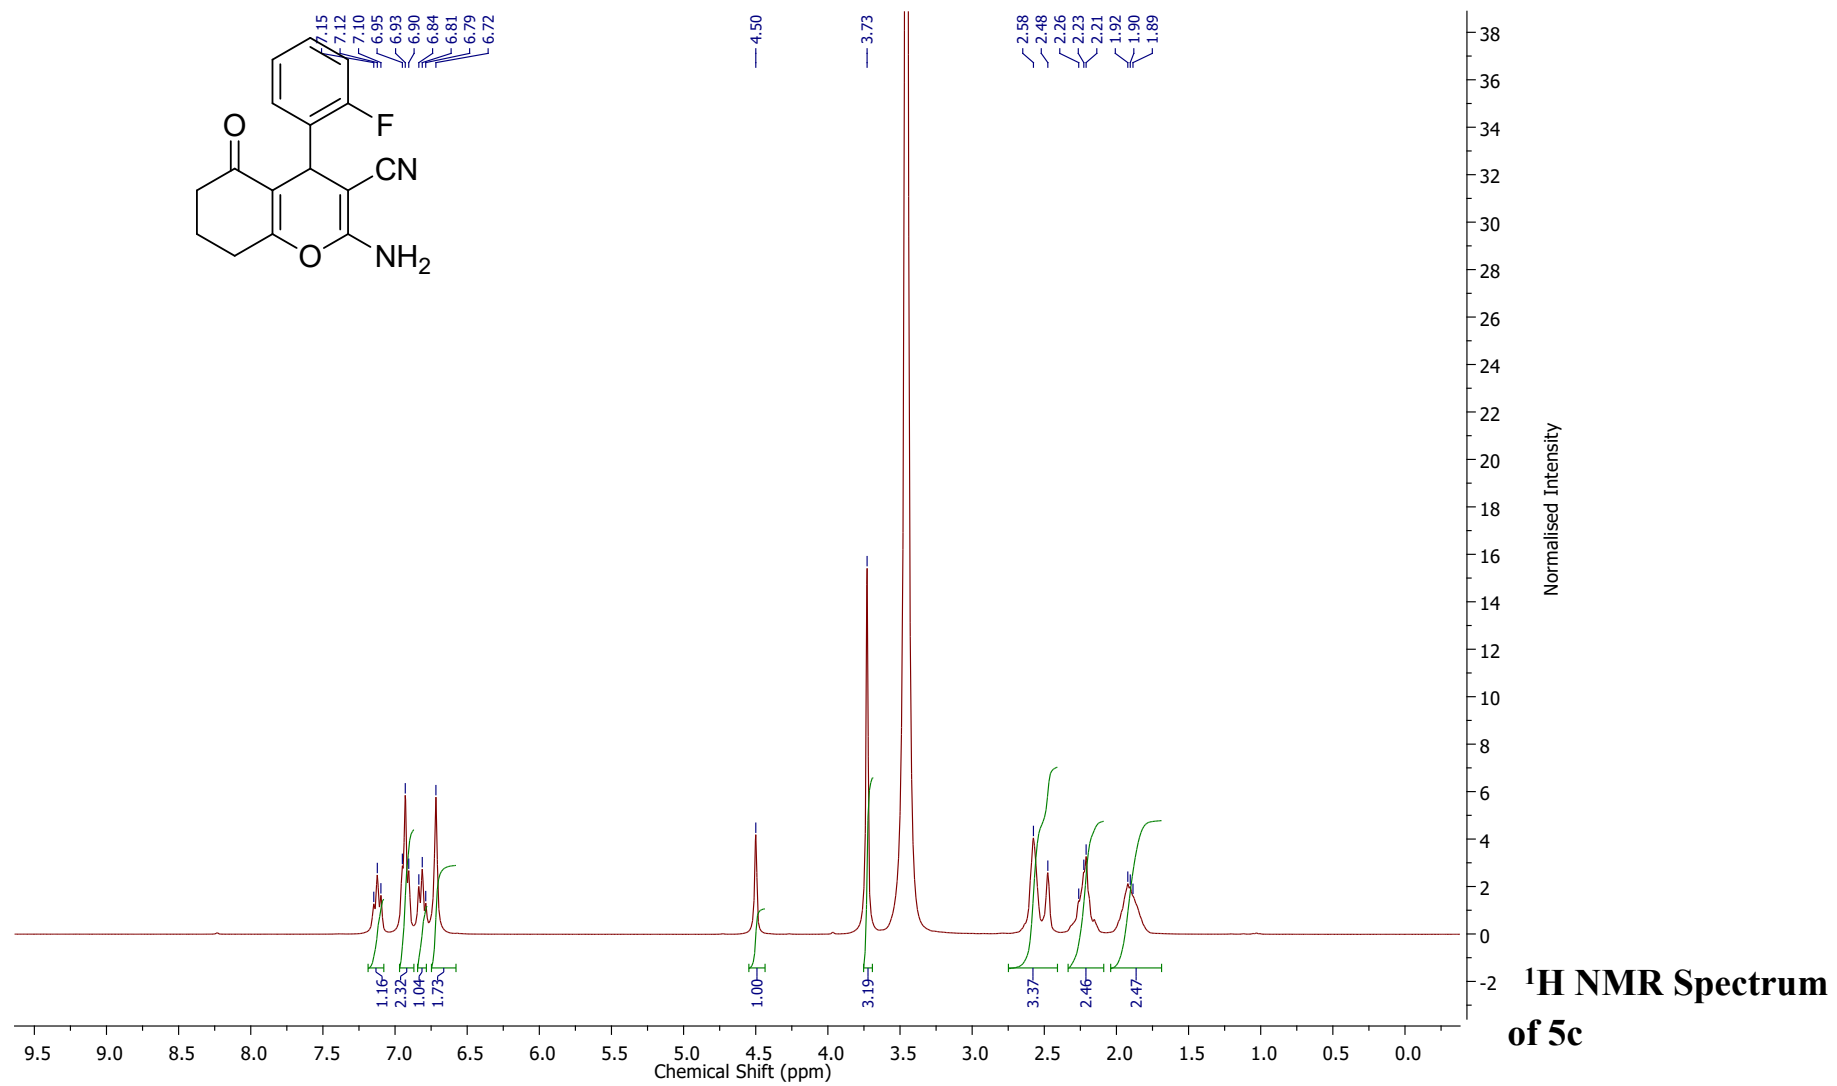

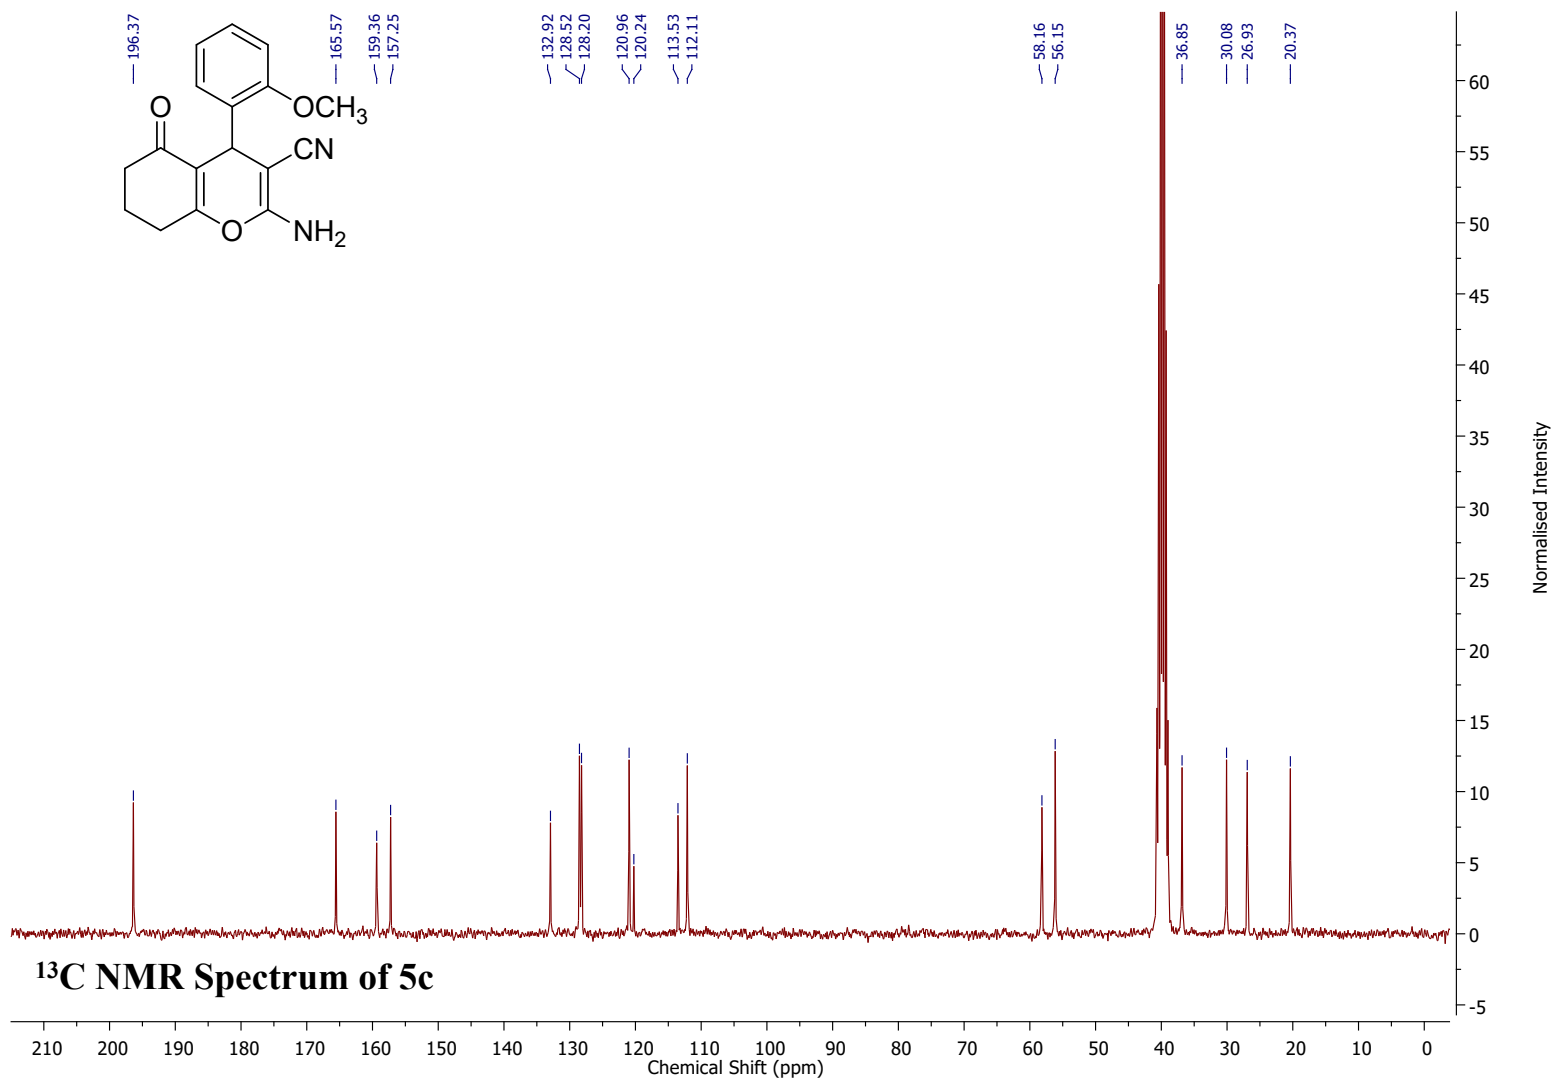

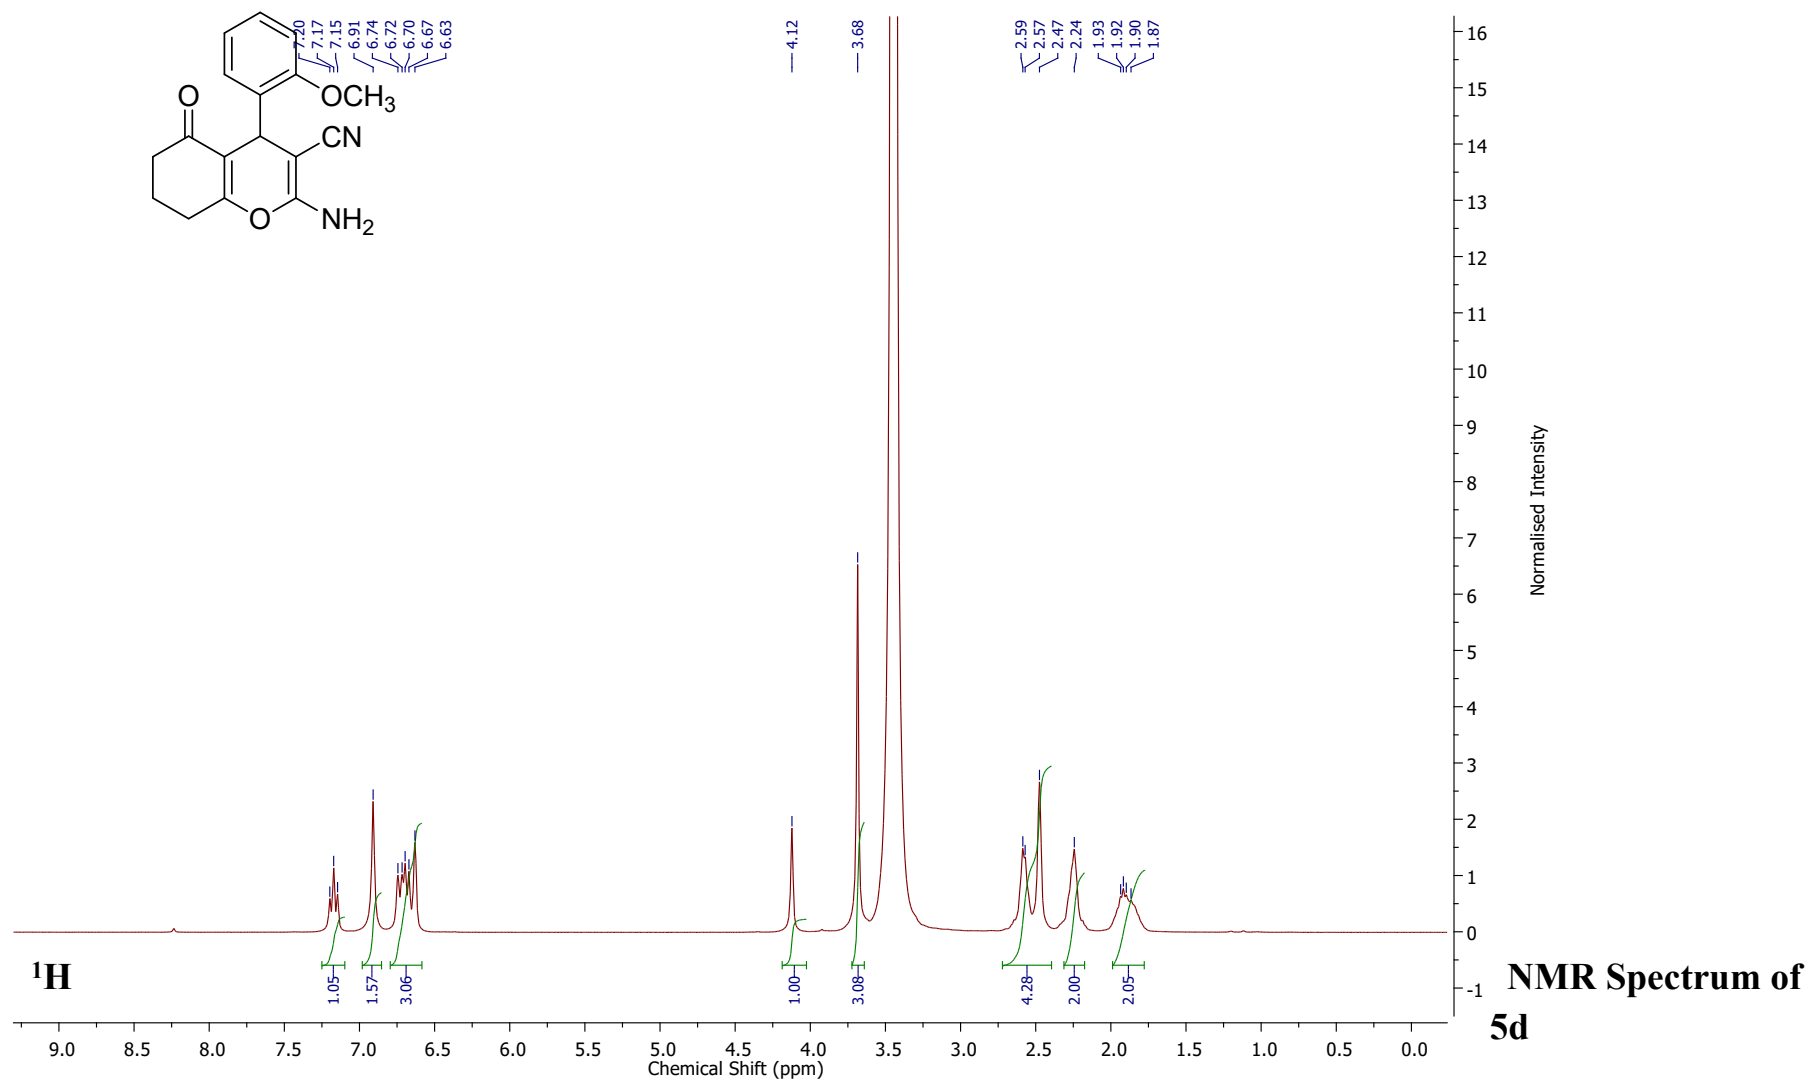

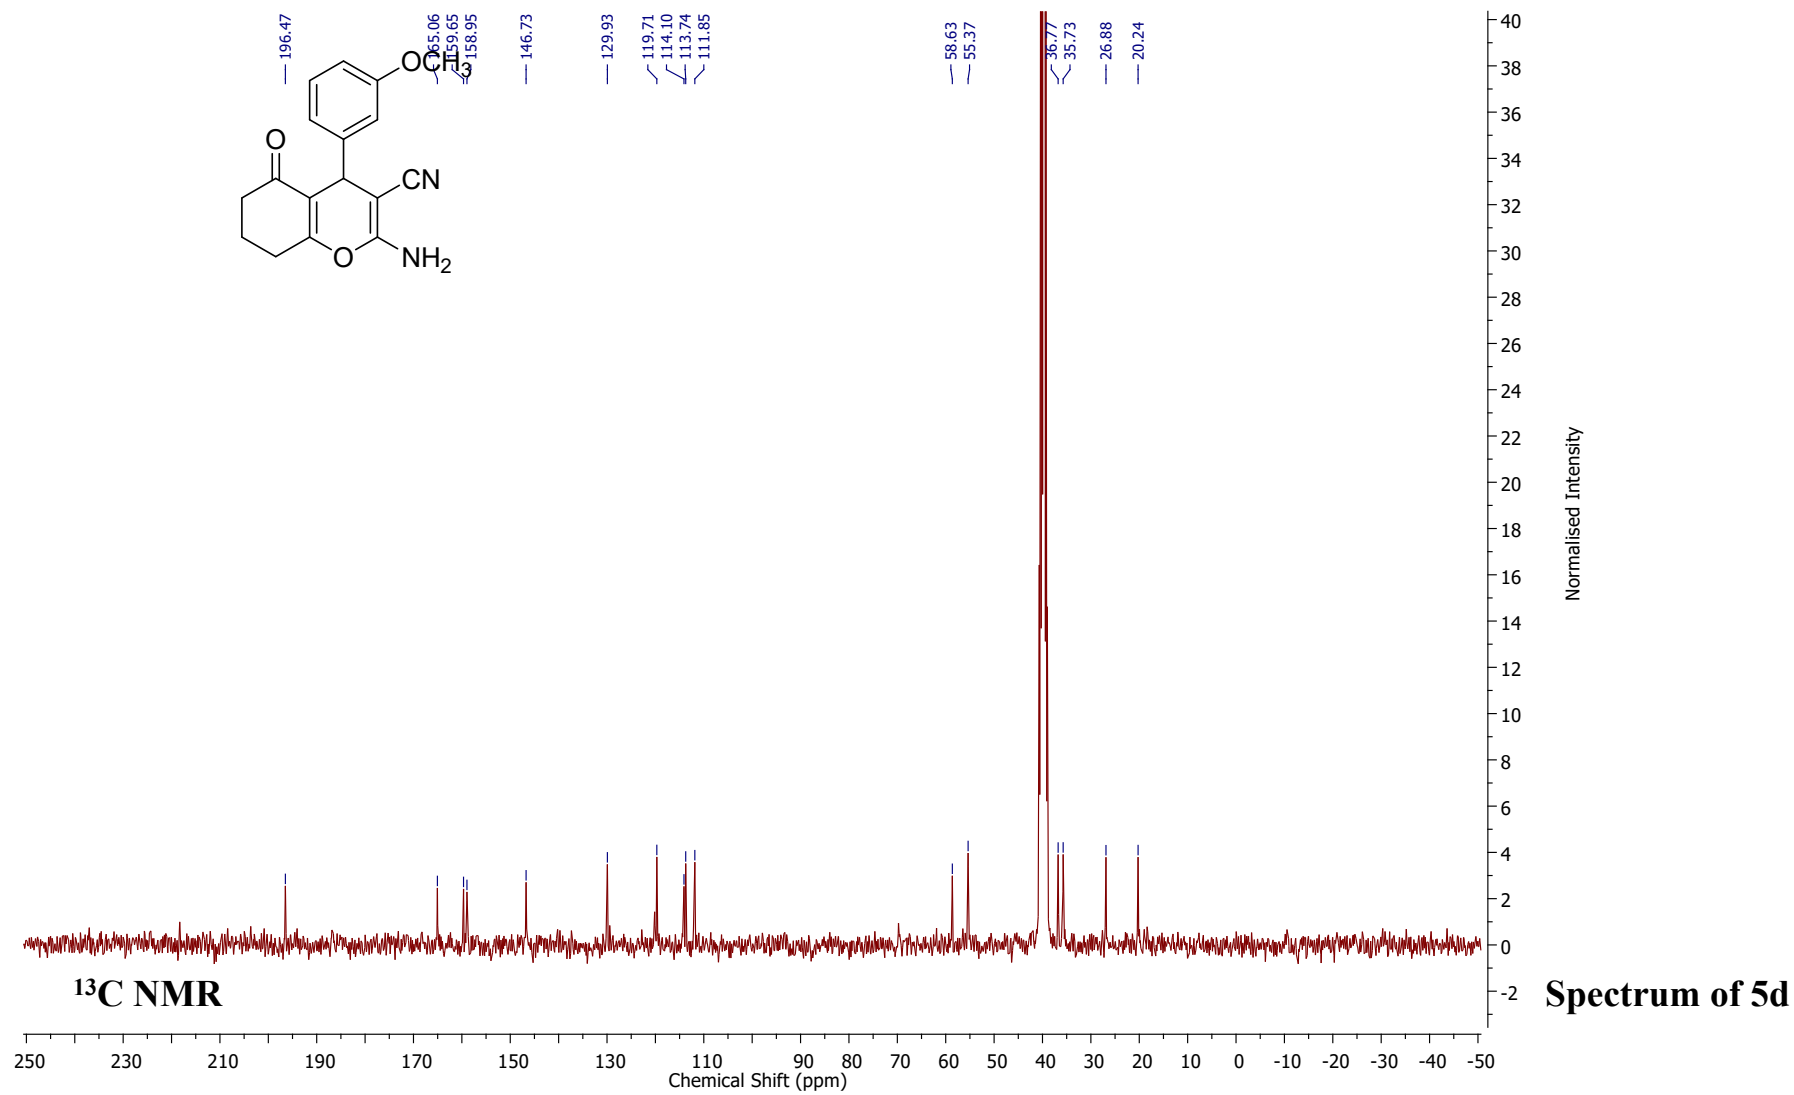

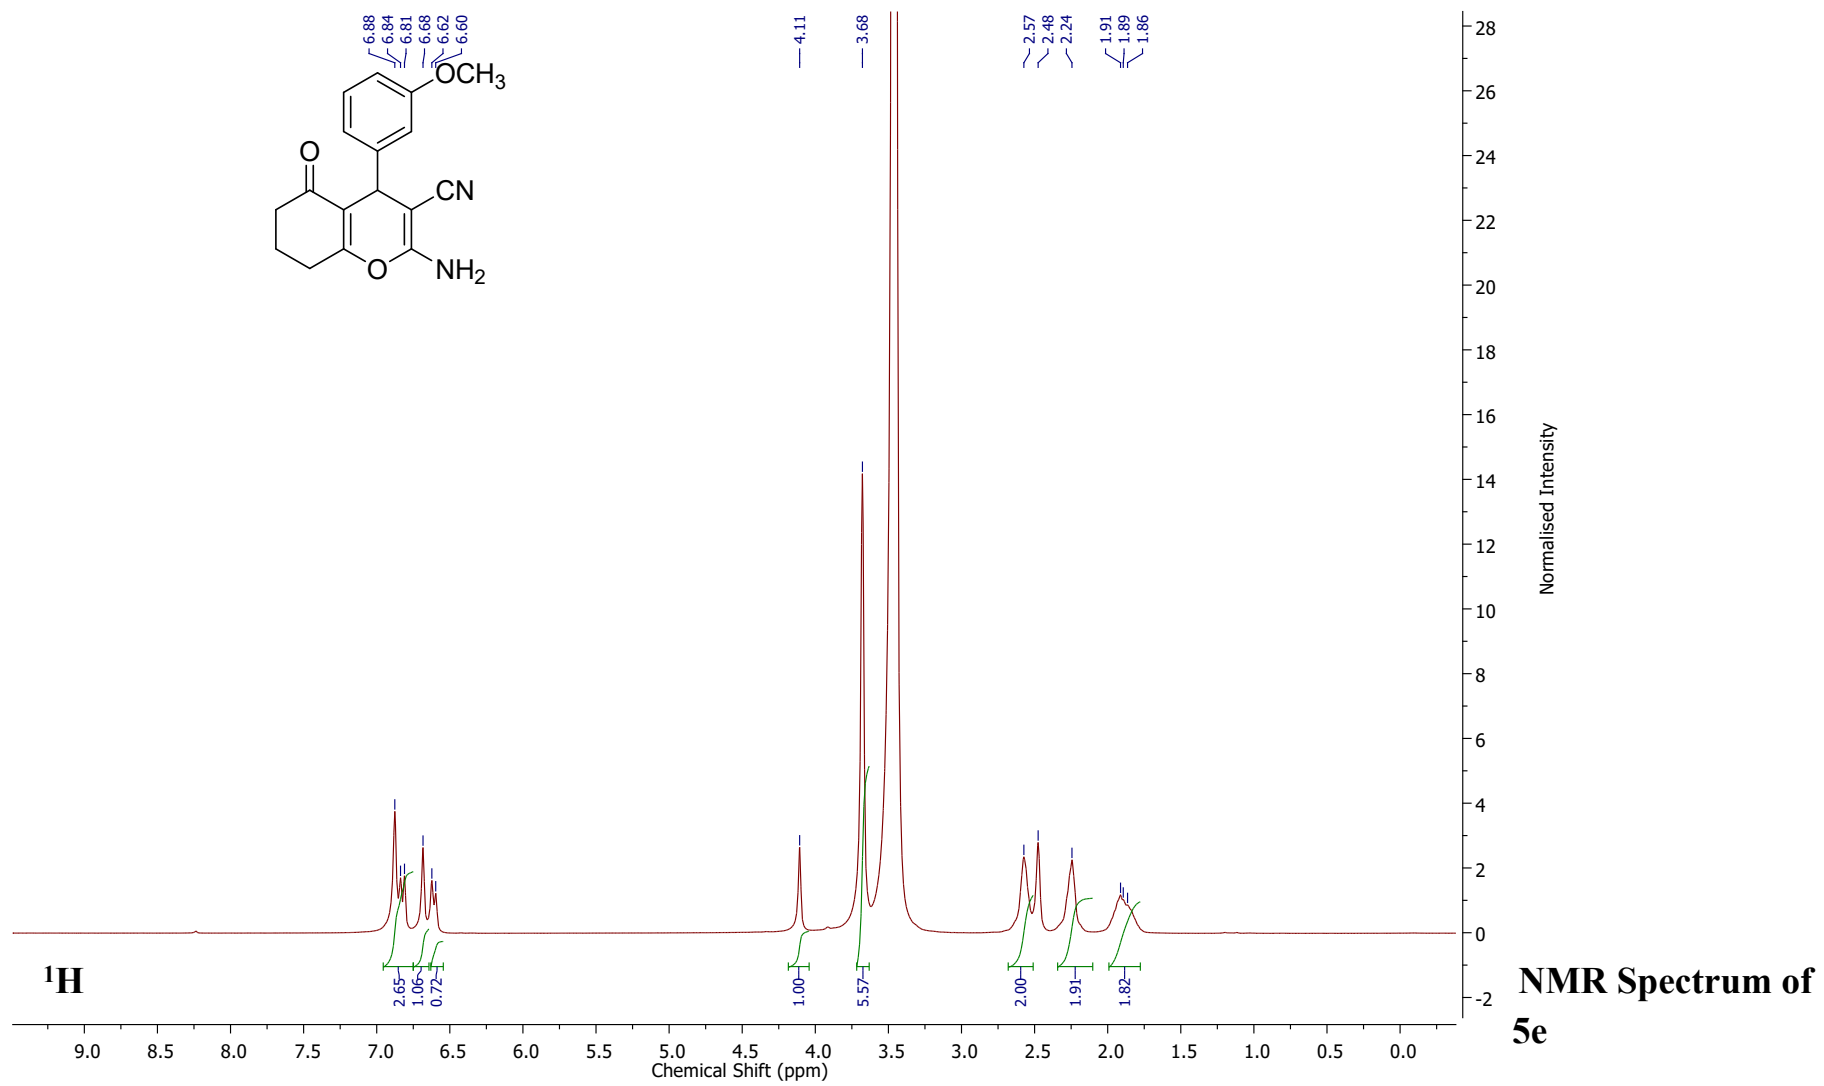



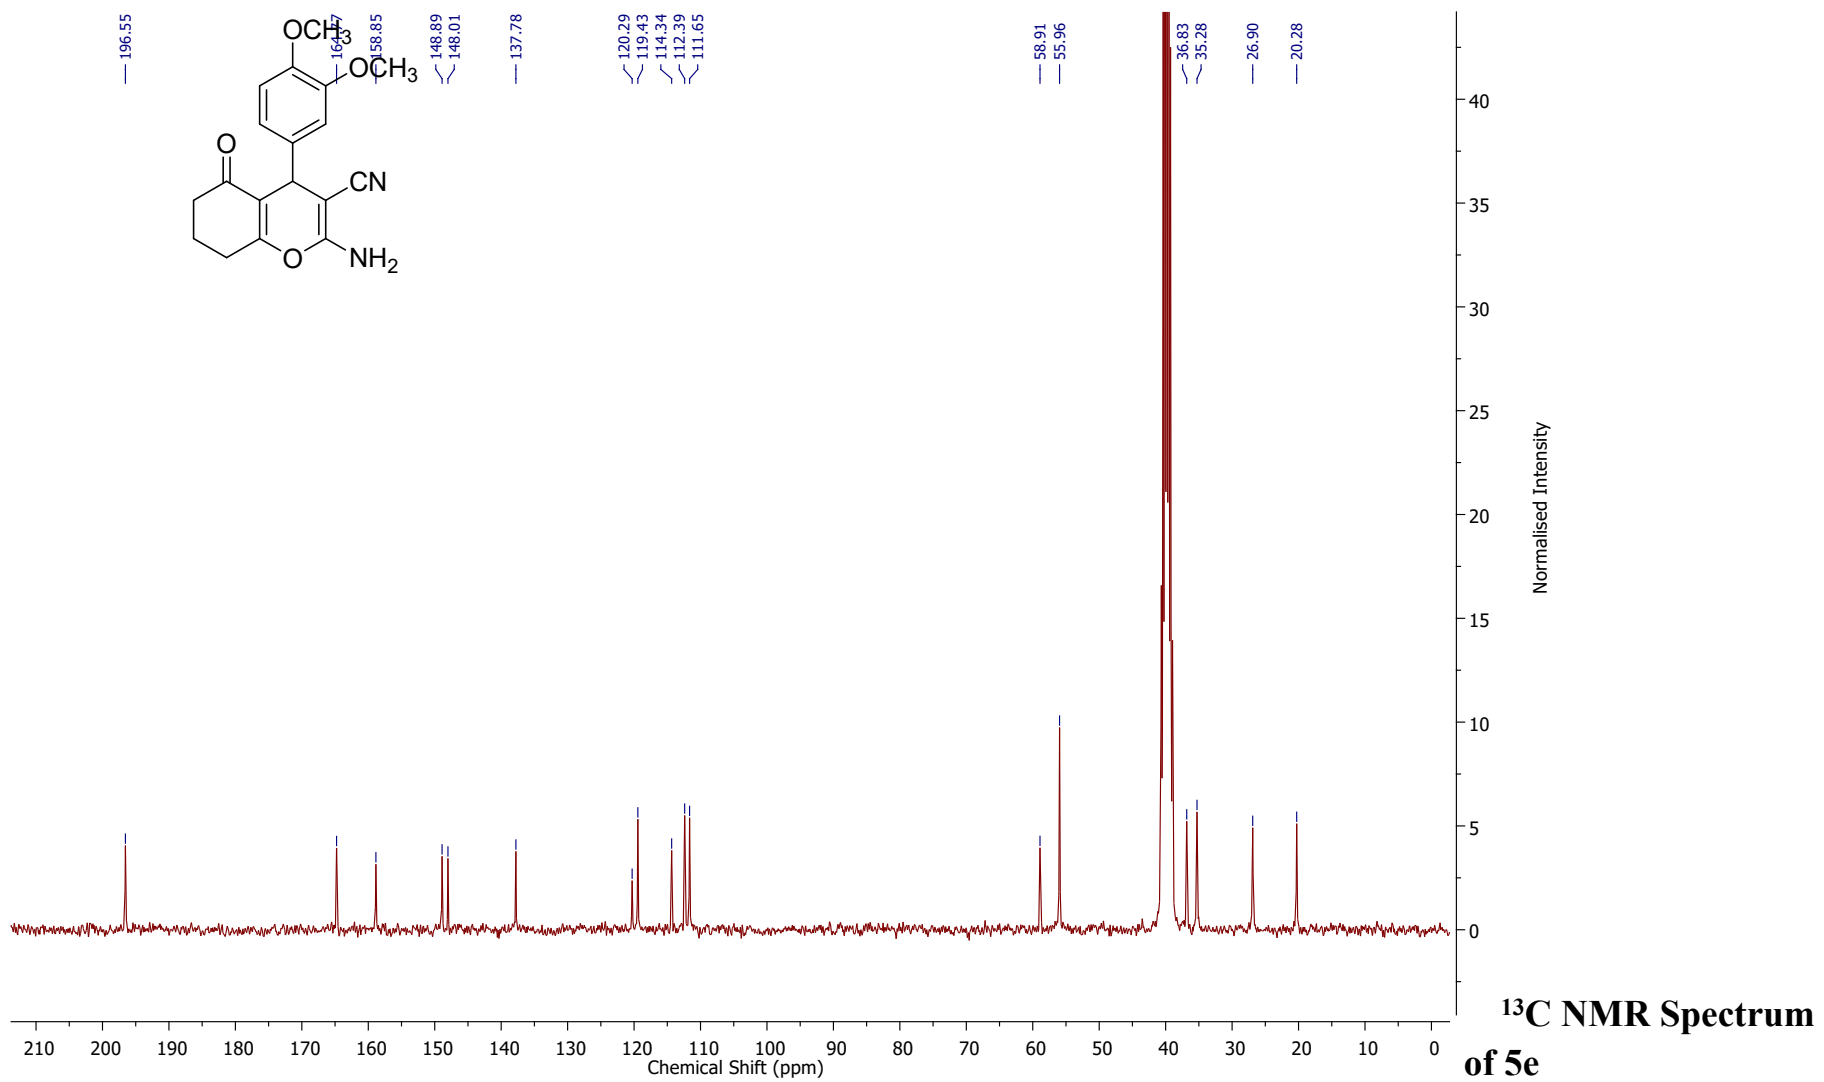

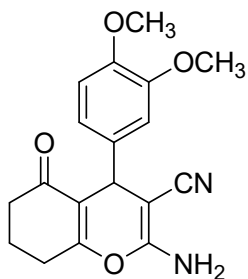

**<sup>1</sup>H NMR Spectrum of 5f**

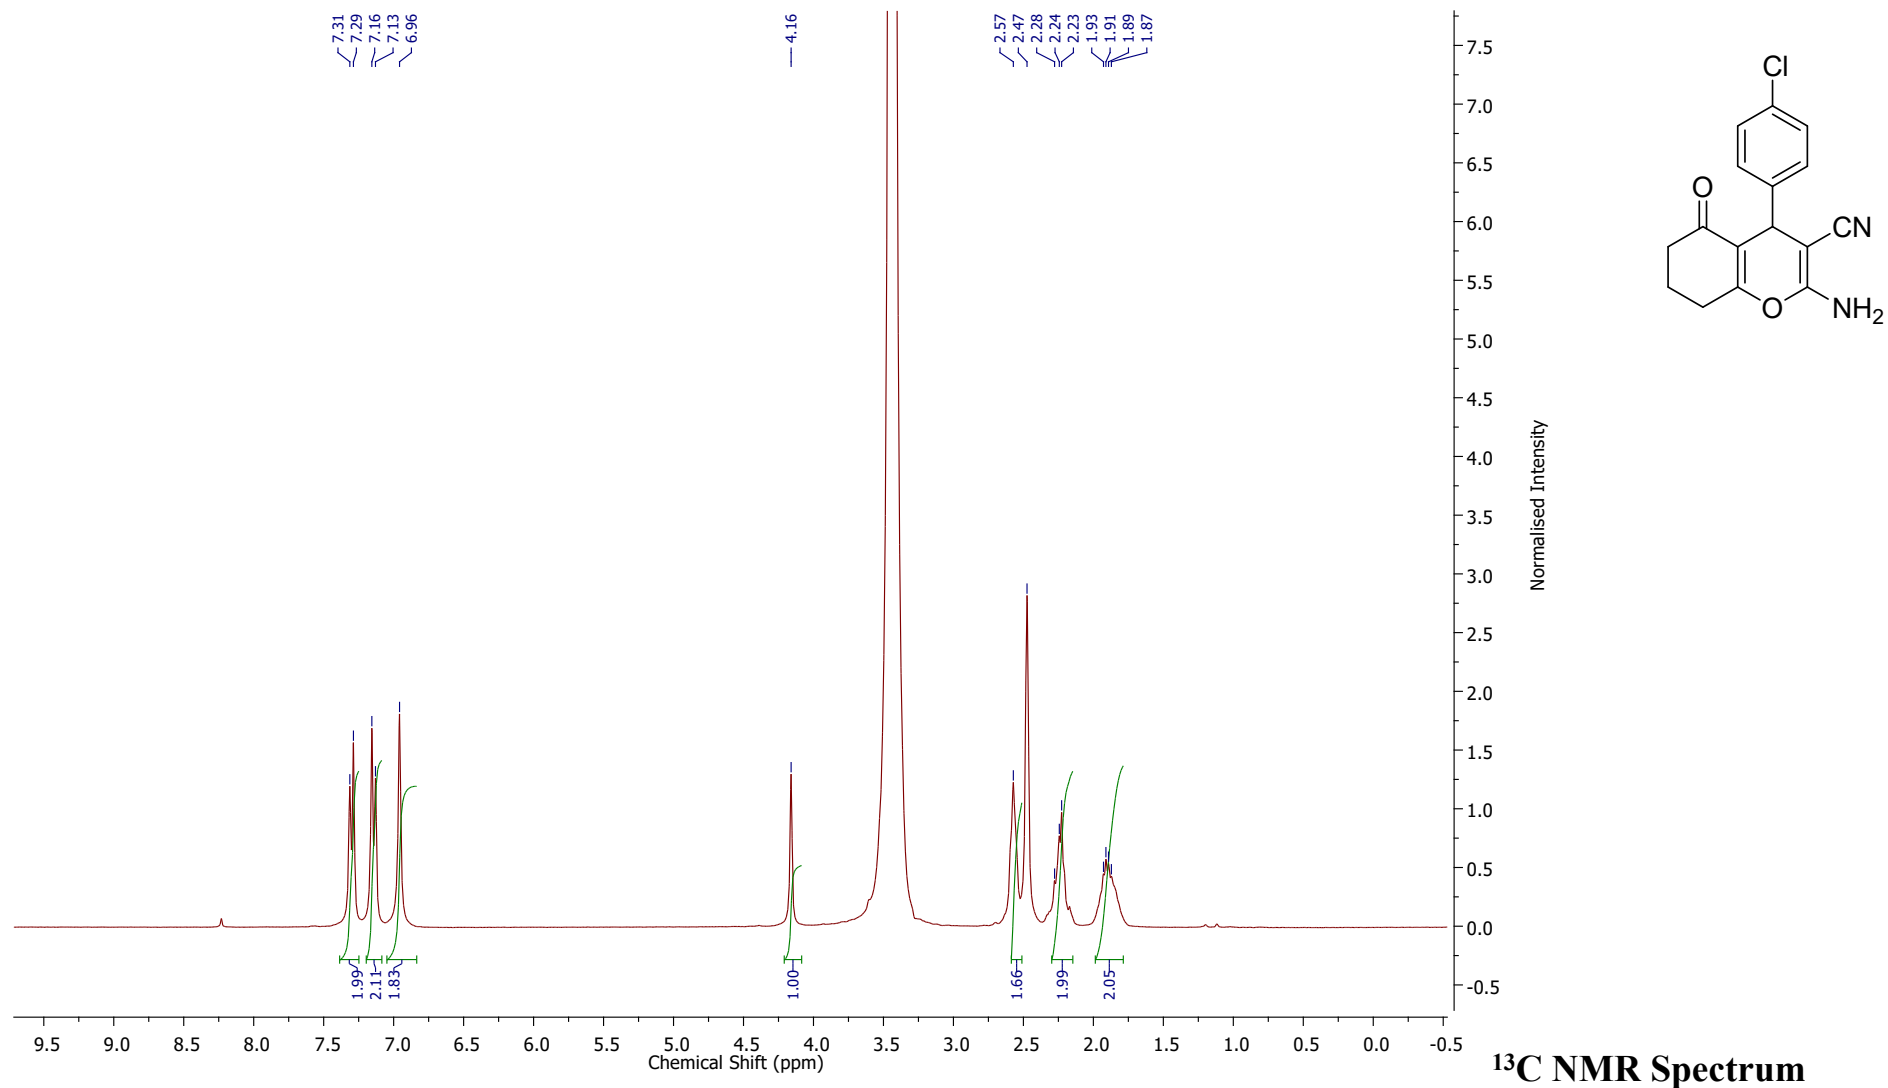

of 5f

**<sup>13</sup>C NMR Spectrum**

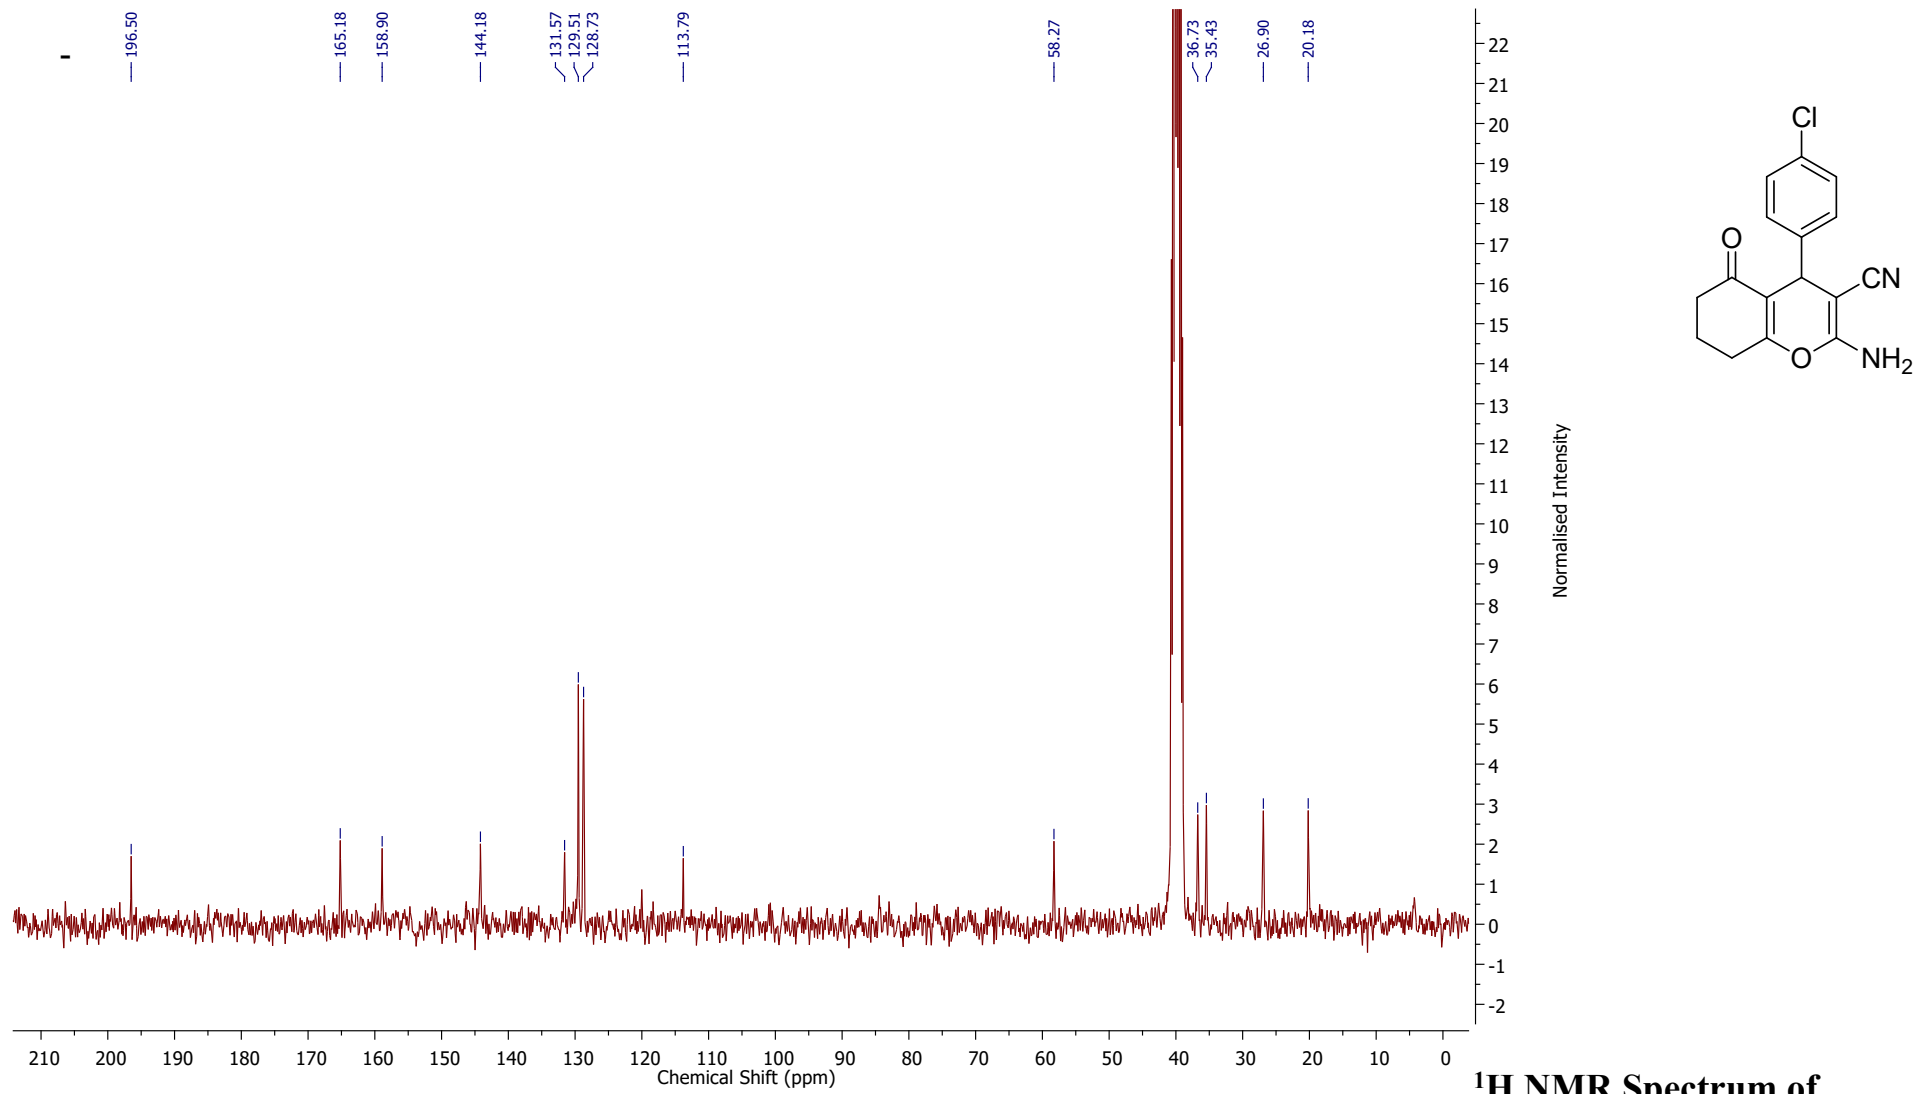

5g

 $^1\text{H}$  NMR Spectrum of

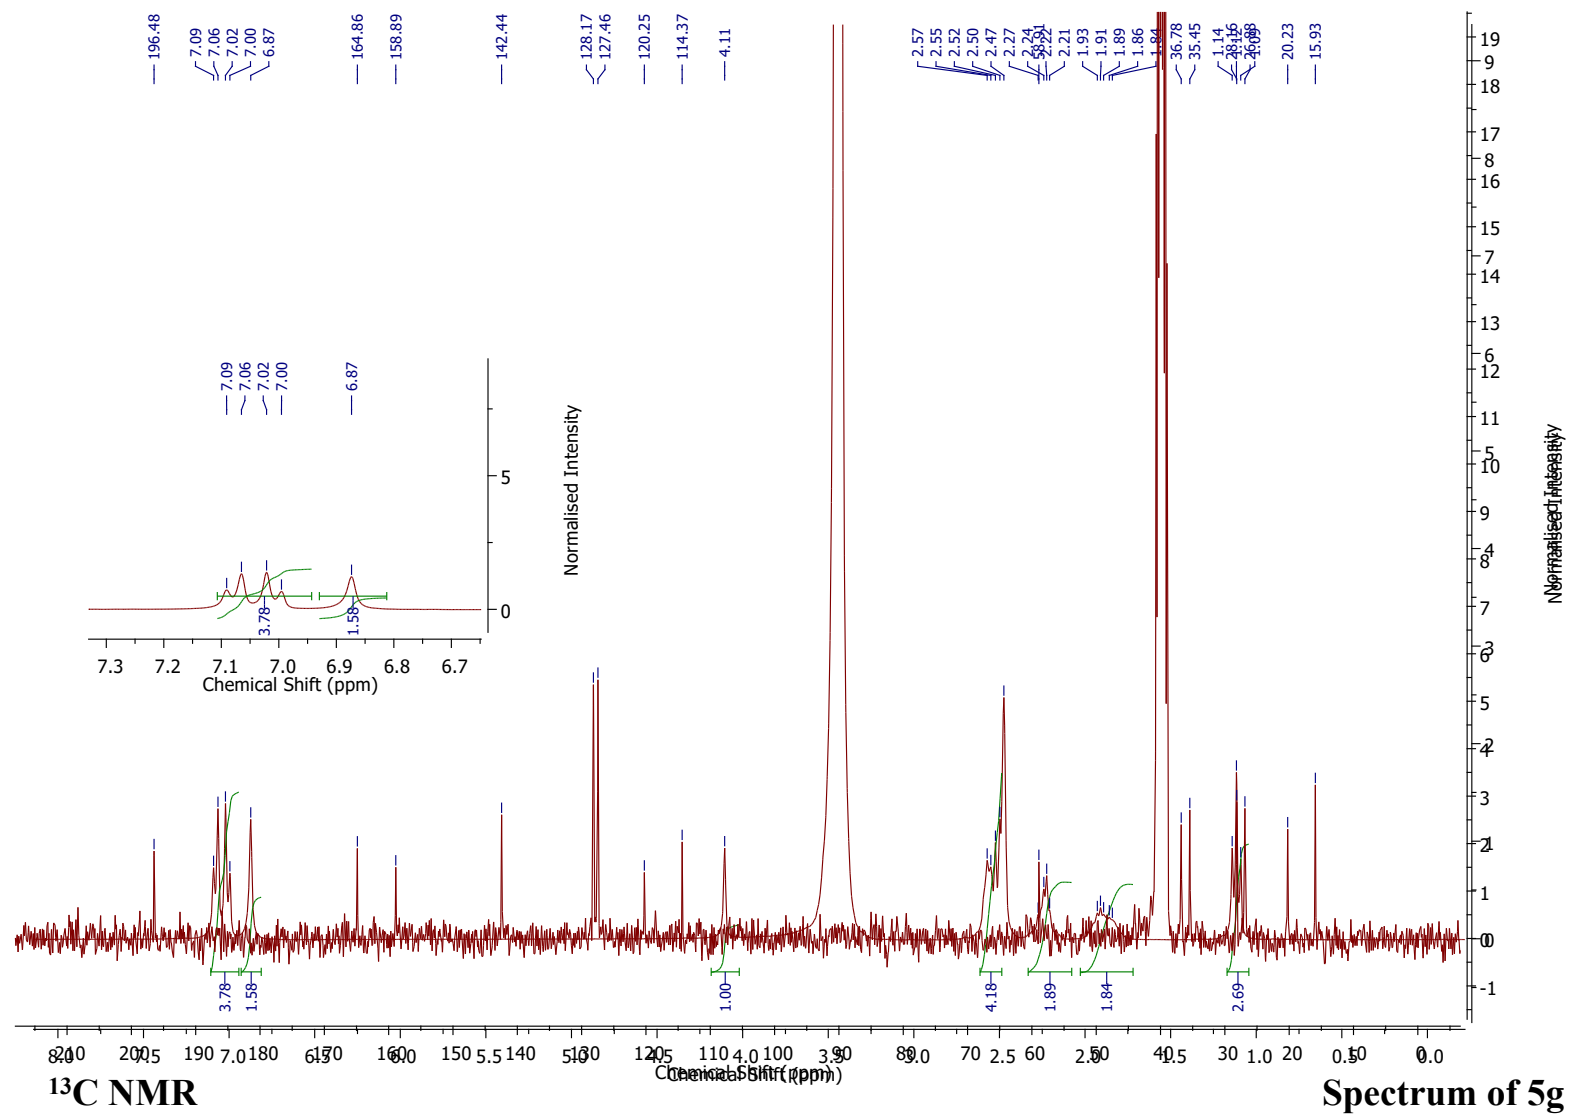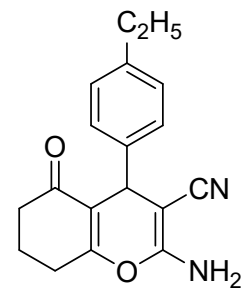

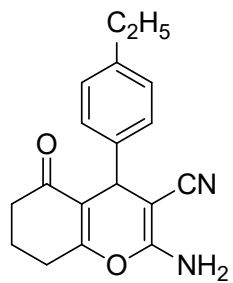

Supplement: d3nj01423a1.pdf [file d3nj01423a1.pdf]
